# Supplementary material for: Association of Antimicrobial Resistance in Campylobacter spp. in Broilers and Turkeys with Antimicrobial Use
Source: MDPI journal article supplement (doi:10.3390/antibiotics10060673), 2021-06-04
Supplement: s1 [file s1]

Table S5: Minimum inhibitory concentrations of 6 antimicrobials for isolats of *C. jejuni* and *C. coli* from poultry

| Year | Sample No. | Matrix_final          | Antimicrobial panel | GEN         | STR   | NAL    | CIP          | TET    | ERY   | Species          |
|------|------------|-----------------------|---------------------|-------------|-------|--------|--------------|--------|-------|------------------|
| 2010 | 10C00291   | Turkey_caecum_content | EUCAMP              | 0,25 <=1    | >64   | >4     | <=0,25       | <=0,5  |       | <i>C. jejuni</i> |
| 2010 | 10C00295   | Turkey_caecum_content | EUCAMP              | 0,25 <=1    |       | 32 >4  | >16          |        | 1     | <i>C. jejuni</i> |
| 2010 | 10C00299   | Turkey_caecum_content | EUCAMP              | 0,25 <=1    |       | 64 >4  | >16          |        | 1     | <i>C. jejuni</i> |
| 2010 | 10C00303   | Turkey_caecum_content | EUCAMP              | 0,5         | 2     | 64     | >4           | >16    | 1     | <i>C. coli</i>   |
| 2010 | 10C00305   | Turkey_caecum_content | EUCAMP              | 0,25 <=1    |       | 64 >4  | <=0,25       |        | 2     | <i>C. jejuni</i> |
| 2010 | 10C00307   | Turkey_caecum_content | EUCAMP              | 0,25 <=1    | <=2   | >4     | >16          | <=0,5  |       | <i>C. jejuni</i> |
| 2010 | 10C00309   | Turkey_caecum_content | EUCAMP              | 0,5         | 2     | >64    | >4           | <=0,25 | >32   | <i>C. coli</i>   |
| 2010 | 10C00310   | Turkey_caecum_content | EUCAMP              | 0,25        | 2     | 32 >4  | >16          | >32    |       | <i>C. jejuni</i> |
| 2010 | 10C00312   | Turkey_caecum_content | EUCAMP              | <=0,125 <=1 |       | 32 >4  | >16          | <=0,5  |       | <i>C. jejuni</i> |
| 2010 | 10C00313   | Turkey_caecum_content | EUCAMP              | 0,5         | 1     | 64     | >4           | >16    | >32   | <i>C. coli</i>   |
| 2010 | 10C00315   | Turkey_caecum_content | EUCAMP              | 0,5         | 2     | 64     | >4           | >16    | >32   | <i>C. coli</i>   |
| 2010 | 10C00317   | Turkey_caecum_content | EUCAMP              | 0,5         | 2     | 16     | >4           | 4      | 1     | <i>C. jejuni</i> |
| 2010 | 10C00318   | Turkey_caecum_content | EUCAMP              | 0,5         | 4     | >64    | >4           | >16    | <=0,5 | <i>C. coli</i>   |
| 2010 | 10C00319   | Turkey_caecum_content | EUCAMP              | 0,5         | 2     | 64     | >4           | >16    | <=0,5 | <i>C. coli</i>   |
| 2010 | 10C00321   | Turkey_caecum_content | EUCAMP              | 0,5         | >16   | 64     | >4           | >16    | >32   | <i>C. coli</i>   |
| 2010 | 10C00323   | Turkey_caecum_content | EUCAMP              | 1           | 4     | 64 >4  | >16          |        | 1     | <i>C. coli</i>   |
| 2010 | 10C00325   | Turkey_caecum_content | EUCAMP              | 0,5         | 2     | 64     | >4           | >16    | <=0,5 | <i>C. coli</i>   |
| 2010 | 10C00327   | Turkey_caecum_content | EUCAMP              | 0,25 <=1    | <=2   |        | 0,125 <=0,25 | <=0,5  |       | <i>C. jejuni</i> |
| 2010 | 10C00334   | Turkey_caecum_content | EUCAMP              | 0,5         | 1     | 64     | >4           | >16    | >32   | <i>C. coli</i>   |
| 2010 | 10C00335   | Turkey_caecum_content | EUCAMP              | 0,25 <=1    | >64   | >4     | >16          |        | 2     | <i>C. jejuni</i> |
| 2010 | 10C00337   | Turkey_caecum_content | EUCAMP              | 0,5         | <=1   | 4      | 0,25         | >16    | <=0,5 | <i>C. jejuni</i> |
| 2010 | 10C00339   | Turkey_caecum_content | EUCAMP              | 0,25 <=1    | <=2   | <=0,06 | <=0,25       | <=0,5  |       | <i>C. jejuni</i> |
| 2010 | 10C00341   | Turkey_caecum_content | EUCAMP              | 0,5         | 2     | >64    | >4           | >16    | 1     | <i>C. coli</i>   |
| 2010 | 10C00343   | Turkey_caecum_content | EUCAMP              | 0,25 <=1    | <=2   | <=0,06 | <=0,25       | <=0,5  |       | <i>C. jejuni</i> |
| 2010 | 10C00345   | Turkey_caecum_content | EUCAMP              | 0,5         | 4     | 4      | 0,125        | >16    | >32   | <i>C. coli</i>   |
| 2010 | 10C00452   | Turkey_caecum_content | EUCAMP              | 0,25 <=1    |       | 4      | 0,25 <=0,25  | <=0,5  |       | <i>C. jejuni</i> |
| 2010 | 10C00571   | Turkey_caecum_content | EUCAMP              | 1           | 2     | 16     | 1 <=0,25     |        | 2     | <i>C. jejuni</i> |
| 2010 | 10C00573   | Turkey_caecum_content | EUCAMP              | 0,25        | 1     | 32 >4  | >16          | >32    |       | <i>C. coli</i>   |
| 2010 | 10C00575   | Turkey_caecum_content | EUCAMP              | 0,25        | 1     | 32 >4  | >16          | >32    |       | <i>C. coli</i>   |
| 2010 | 10C00577   | Turkey_caecum_content | EUCAMP              | 0,25        | 1     | 64 >4  | >16          | >32    |       | <i>C. coli</i>   |
| 2010 | 10C00579   | Turkey_caecum_content | EUCAMP              | 0,25 <=1    |       | 32 >4  | <=0,25       | <=0,5  |       | <i>C. jejuni</i> |
| 2010 | 10C00581   | Turkey_caecum_content | EUCAMP              | 1           | 4 >64 | >4     | >16          | >32    |       | <i>C. coli</i>   |

Table S5: Minimum inhibitory concentrations of 6 antimicrobials for isolats of *C. jejuni* and *C. coli* from poultry

| Year | Sample No. | Matrix_final          | Antimicrobial panel | GEN  | STR | NAL | CIP   | TET    | ERY Species            |
|------|------------|-----------------------|---------------------|------|-----|-----|-------|--------|------------------------|
| 2010 | 10C00583   | Turkey_caecum_content | EUCAMP              | 0,5  | 1   | 64  | >4    | >16    | >32 <i>C. coli</i>     |
| 2010 | 10C00585   | Turkey_caecum_content | EUCAMP              | 1    | >16 | >64 | >4    | >16    | >32 <i>C. coli</i>     |
| 2010 | 10C00587   | Turkey_caecum_content | EUCAMP              | 0,25 | 1   | 32  | >4    | >16    | >32 <i>C. coli</i>     |
| 2010 | 10C00589   | Turkey_caecum_content | EUCAMP              | 0,5  | 2   | 64  | >4    | >16    | >32 <i>C. coli</i>     |
| 2010 | 10C00591   | Turkey_caecum_content | EUCAMP              | 0,5  | 2   | 64  | >4    | >16    | >32 <i>C. coli</i>     |
| 2010 | 10C00593   | Turkey_caecum_content | EUCAMP              | 0,5  | 4   | 64  | >4    | >16    | <=0,5 <i>C. jejuni</i> |
| 2010 | 10C00595   | Turkey_caecum_content | EUCAMP              | 0,5  | 2   | 64  | >4    | >16    | >32 <i>C. coli</i>     |
| 2010 | 10C00597   | Turkey_caecum_content | EUCAMP              | 0,25 | <=1 | 64  | >4    | >16    | 2 <i>C. jejuni</i>     |
| 2010 | 10C00599   | Turkey_caecum_content | EUCAMP              | 0,5  | 2   | 64  | >4    | >16    | <=0,5 <i>C. jejuni</i> |
| 2010 | 10C00601   | Turkey_caecum_content | EUCAMP              | 1    | 4   | 8   | 0,25  | <=0,25 | 2 <i>C. jejuni</i>     |
| 2010 | 10C00603   | Turkey_caecum_content | EUCAMP              | 0,5  | 4   | >64 | >4    | >16    | 1 <i>C. jejuni</i>     |
| 2010 | 10C00605   | Turkey_caecum_content | EUCAMP              | 0,5  | 2   | 4   | 0,125 | <=0,25 | 1 <i>C. jejuni</i>     |
| 2010 | 10C00608-1 | Turkey_caecum_content | EUCAMP              | 0,5  | 2   | 4   | 0,25  | <=0,25 | 1 <i>C. jejuni</i>     |
| 2010 | 10C00610   | Turkey_caecum_content | EUCAMP              | 0,5  | 2   | 64  | >4    | >16    | >32 <i>C. coli</i>     |
| 2010 | 10C00611   | Turkey_caecum_content | EUCAMP              | 1    | 2   | 64  | >4    | >16    | >32 <i>C. coli</i>     |
| 2010 | 10C00613   | Turkey_caecum_content | EUCAMP              | 0,5  | 2   | 8   | 0,5   | <=0,25 | <=0,5 <i>C. coli</i>   |
| 2010 | 10C00615   | Turkey_caecum_content | EUCAMP              | 0,5  | 2   | 64  | >4    | >16    | 1 <i>C. coli</i>       |
| 2010 | 10C00617   | Turkey_caecum_content | EUCAMP              | 0,5  | 2   | 64  | >4    | >16    | >32 <i>C. coli</i>     |
| 2010 | 10C00619   | Turkey_caecum_content | EUCAMP              | 0,5  | 2   | 64  | >4    | >16    | >32 <i>C. coli</i>     |
| 2010 | 10C00623   | Turkey_caecum_content | EUCAMP              | 1    | 2   | 64  | >4    | <=0,25 | <=0,5 <i>C. coli</i>   |
| 2010 | 10C00625   | Turkey_caecum_content | EUCAMP              | 0,5  | <=1 | 4   | 0,25  | <=0,25 | 1 <i>C. jejuni</i>     |
| 2010 | 10C00627   | Turkey_caecum_content | EUCAMP              | 0,5  | 2   | 64  | >4    | >16    | >32 <i>C. coli</i>     |
| 2010 | 10C00629   | Turkey_caecum_content | EUCAMP              | 0,5  | 4   | >64 | >4    | >16    | 2 <i>C. coli</i>       |
| 2010 | 10C00630   | Turkey_caecum_content | EUCAMP              | 0,5  | 4   | 64  | >4    | >16    | 1 <i>C. coli</i>       |
| 2010 | 10C00632   | Turkey_caecum_content | EUCAMP              | 0,5  | 2   | 4   | 0,125 | <=0,25 | <=0,5 <i>C. jejuni</i> |
| 2010 | 10C00634   | Turkey_caecum_content | EUCAMP              | 0,5  | 2   | 64  | >4    | >16    | >32 <i>C. coli</i>     |
| 2010 | 10C00636   | Turkey_caecum_content | EUCAMP              | 0,5  | 2   | 64  | >4    | >16    | >32 <i>C. coli</i>     |
| 2010 | 10C00640-1 | Turkey_caecum_content | EUCAMP              | 0,5  | <=1 | 4   | 0,125 | <=0,25 | >32 <i>C. jejuni</i>   |
| 2010 | 10C00642   | Turkey_caecum_content | EUCAMP              | 0,5  | <=1 | >64 | >4    | >16    | <=0,5 <i>C. jejuni</i> |
| 2010 | 10C00644   | Turkey_caecum_content | EUCAMP              | 0,5  | 2   | 64  | >4    | >16    | >32 <i>C. coli</i>     |
| 2010 | 10C00646-1 | Turkey_caecum_content | EUCAMP              | 0,25 | <=1 | 4   | 0,125 | >16    | <=0,5 <i>C. jejuni</i> |
| 2010 | 11C00008   | Turkey_caecum_content | EUCAMP              | 0,5  | 2   | 64  | >4    | >16    | >32 <i>C. coli</i>     |

Table S5: Minimum inhibitory concentrations of 6 antimicrobials for isolats of *C. jejuni* and *C. coli* from poultry

| Year | Sample No. | Matrix_final          | Antimicrobial panel | GEN     | STR | NAL | CIP   | TET    | ERY   | Species          |
|------|------------|-----------------------|---------------------|---------|-----|-----|-------|--------|-------|------------------|
| 2010 | 11C00010   | Turkey_caecum_content | EUCAMP              | 0,5     | 2   | 32  | >4    | >16    | >32   | <i>C. coli</i>   |
| 2010 | 11C00012   | Turkey_caecum_content | EUCAMP              | 0,5     | >16 | 64  | >4    | >16    | 2     | <i>C. jejuni</i> |
| 2010 | 11C00014   | Turkey_caecum_content | EUCAMP              | 0,25    | <=1 | 32  | >4    | >16    | <=0,5 | <i>C. jejuni</i> |
| 2010 | 11C00016   | Turkey_caecum_content | EUCAMP              | 0,5     | >16 | >64 | >4    | >16    | 1     | <i>C. coli</i>   |
| 2010 | 11C00018   | Turkey_caecum_content | EUCAMP              | 0,5     | 8   | >64 | >4    | >16    | 1     | <i>C. coli</i>   |
| 2010 | 11C00020   | Turkey_caecum_content | EUCAMP              | <=0,125 | <=1 | 4   | 0,25  | 4      | <=0,5 | <i>C. jejuni</i> |
| 2010 | 11C00022-1 | Turkey_caecum_content | EUCAMP              | 0,5     | 2   | 64  | >4    | <=0,25 | 1     | <i>C. jejuni</i> |
| 2010 | 11C00022-2 | Turkey_caecum_content | EUCAMP              | 2       | >16 | >64 | >4    | >16    | <=0,5 | <i>C. coli</i>   |
| 2010 | 11C00024   | Turkey_caecum_content | EUCAMP              | 0,25    | <=1 | 64  | >4    | >16    | <=0,5 | <i>C. jejuni</i> |
| 2010 | 11C00026   | Turkey_caecum_content | EUCAMP              | 0,5     | <=1 | 32  | >4    | >16    | <=0,5 | <i>C. jejuni</i> |
| 2010 | 11C00028   | Turkey_caecum_content | EUCAMP              | 0,5     | 1   | 64  | >4    | >16    | 1     | <i>C. coli</i>   |
| 2010 | 11C00030   | Turkey_caecum_content | EUCAMP              | 0,5     | >16 | 64  | >4    | >16    | >32   | <i>C. coli</i>   |
| 2010 | 11C00032-1 | Turkey_caecum_content | EUCAMP              | <=0,125 | <=1 | 64  | >4    | 16     | <=0,5 | <i>C. jejuni</i> |
| 2010 | 11C00032-2 | Turkey_caecum_content | EUCAMP              | <=0,125 | >16 | >64 | >4    | >16    | 1     | <i>C. coli</i>   |
| 2010 | 11C00034   | Turkey_caecum_content | EUCAMP              | 0,25    | <=1 | 64  | >4    | >16    | <=0,5 | <i>C. jejuni</i> |
| 2010 | 11C00036   | Turkey_caecum_content | EUCAMP              | 0,5     | 2   | 32  | >4    | >16    | >32   | <i>C. coli</i>   |
| 2010 | 11C00038   | Turkey_caecum_content | EUCAMP              | 0,5     | 2   | 64  | >4    | >16    | 1     | <i>C. coli</i>   |
| 2010 | 11C00040   | Turkey_caecum_content | EUCAMP              | 0,5     | 2   | 32  | >4    | >16    | >32   | <i>C. coli</i>   |
| 2010 | 11C00043   | Turkey_caecum_content | EUCAMP              | 0,5     | 1   | 4   | 0,125 | <=0,25 | <=0,5 | <i>C. coli</i>   |
| 2010 | 11C00045   | Turkey_caecum_content | EUCAMP              | 0,5     | 2   | >64 | >4    | >16    | 1     | <i>C. coli</i>   |
| 2010 | 11C00048   | Turkey_caecum_content | EUCAMP              | 0,25    | <=1 | 32  | >4    | >16    | <=0,5 | <i>C. jejuni</i> |
| 2010 | 11C00050   | Turkey_caecum_content | EUCAMP              | 0,5     | 2   | 64  | >4    | >16    | >32   | <i>C. coli</i>   |
| 2010 | 11C00054   | Turkey_caecum_content | EUCAMP              | 0,5     | <=1 | 32  | >4    | >16    | <=0,5 | <i>C. jejuni</i> |
| 2010 | 11C00057   | Turkey_caecum_content | EUCAMP              | 0,5     | 2   | 64  | >4    | >16    | >32   | <i>C. coli</i>   |
| 2010 | 11C00059   | Turkey_caecum_content | EUCAMP              | 0,5     | 1   | 8   | 0,25  | >16    | >32   | <i>C. coli</i>   |
| 2010 | 11C00061   | Turkey_caecum_content | EUCAMP              | <=0,125 | <=1 | 64  | >4    | <=0,25 | <=0,5 | <i>C. jejuni</i> |
| 2010 | 11C00063   | Turkey_caecum_content | EUCAMP              | 0,5     | 1   | 32  | >4    | >16    | >32   | <i>C. coli</i>   |
| 2010 | 11C00064   | Turkey_caecum_content | EUCAMP              | 0,25    | 1   | 16  | >4    | >16    | >32   | <i>C. coli</i>   |
| 2010 | 11C00070   | Turkey_caecum_content | EUCAMP              | 0,5     | 1   | 64  | >4    | >16    | 1     | <i>C. coli</i>   |
| 2010 | 11C00072   | Turkey_caecum_content | EUCAMP              | 0,5     | 1   | 64  | >4    | >16    | >32   | <i>C. coli</i>   |
| 2010 | 11C00074   | Turkey_caecum_content | EUCAMP              | 0,25    | <=1 | 64  | >4    | >16    | 1     | <i>C. jejuni</i> |
| 2010 | 11C00076   | Turkey_caecum_content | EUCAMP              | <=0,125 | <=1 | 16  | >4    | >16    | <=0,5 | <i>C. jejuni</i> |

Table S5: Minimum inhibitory concentrations of 6 antimicrobials for isolats of *C. jejuni* and *C. coli* from poultry

| Year | Sample No. | Matrix_final          | Antimicrobial panel | GEN     | STR | NAL | CIP   | TET    | ERY   | Species          |
|------|------------|-----------------------|---------------------|---------|-----|-----|-------|--------|-------|------------------|
| 2010 | 11C00077   | Turkey_caecum_content | EUCAMP              | 0,25    | <=1 | 64  | 4     | >16    | 1     | <i>C. jejuni</i> |
| 2010 | 11C00079   | Turkey_caecum_content | EUCAMP              | 0,5     | 1   | 64  | >4    | >16    | >32   | <i>C. coli</i>   |
| 2010 | 11C00081   | Turkey_caecum_content | EUCAMP              | 0,25    | <=1 | 64  | >4    | >16    | <=0,5 | <i>C. jejuni</i> |
| 2010 | 11C00083   | Turkey_caecum_content | EUCAMP              | 0,5     | 2   | 64  | >4    | >16    | >32   | <i>C. coli</i>   |
| 2010 | 11C00086   | Turkey_caecum_content | EUCAMP              | 0,5     | 4   | >64 | >4    | >16    | >32   | <i>C. coli</i>   |
| 2010 | 11C00088   | Turkey_caecum_content | EUCAMP              | 0,25    | <=1 | 32  | >4    | >16    | <=0,5 | <i>C. jejuni</i> |
| 2010 | 11C00090   | Turkey_caecum_content | EUCAMP              | 0,5     | 1   | 64  | >4    | >16    | >32   | <i>C. coli</i>   |
| 2010 | 11C00091   | Turkey_caecum_content | EUCAMP              | 1       | 1   | 64  | >4    | <=0,25 | <=0,5 | <i>C. coli</i>   |
| 2010 | 11C00092   | Turkey_caecum_content | EUCAMP              | 0,5     | <=1 | <=2 | 0,125 | >16    | <=0,5 | <i>C. jejuni</i> |
| 2010 | 11C00094   | Turkey_caecum_content | EUCAMP              | 0,5     | 1   | 64  | >4    | >16    | <=0,5 | <i>C. coli</i>   |
| 2010 | 11C00096   | Turkey_caecum_content | EUCAMP              | 0,25    | <=1 | 64  | >4    | <=0,25 | <=0,5 | <i>C. jejuni</i> |
| 2010 | 11C00098   | Turkey_caecum_content | EUCAMP              | 0,25    | <=1 | >64 | >4    | 0,5    | 2     | <i>C. jejuni</i> |
| 2010 | 11C00100-1 | Turkey_caecum_content | EUCAMP              | 0,5     | 2   | 64  | >4    | >16    | >32   | <i>C. coli</i>   |
| 2010 | 11C00100-2 | Turkey_caecum_content | EUCAMP              | 0,25    | 2   | 4   | 0,125 | <=0,25 | <=0,5 | <i>C. jejuni</i> |
| 2010 | 11C00101   | Turkey_caecum_content | EUCAMP              | 1       | 2   | >64 | >4    | <=0,25 | 2     | <i>C. coli</i>   |
| 2010 | 11C00103   | Turkey_caecum_content | EUCAMP              | 1       | 4   | 64  | >4    | >16    | >32   | <i>C. coli</i>   |
| 2010 | 11C00105   | Turkey_caecum_content | EUCAMP              | 0,5     | <=1 | 32  | >4    | >16    | <=0,5 | <i>C. jejuni</i> |
| 2010 | 11C00107   | Turkey_caecum_content | EUCAMP              | 0,5     | 2   | 64  | >4    | >16    | >32   | <i>C. coli</i>   |
| 2010 | 11C00109   | Turkey_caecum_content | EUCAMP              | 0,5     | 2   | 64  | >4    | >16    | >32   | <i>C. coli</i>   |
| 2010 | 11C00110   | Turkey_caecum_content | EUCAMP              | <=0,125 | <=1 | 32  | >4    | >16    | <=0,5 | <i>C. jejuni</i> |
| 2010 | 11C00112   | Turkey_caecum_content | EUCAMP              | 0,5     | 2   | 32  | >4    | >16    | >32   | <i>C. coli</i>   |
| 2010 | 11C00114   | Turkey_caecum_content | EUCAMP              | 1       | 2   | >64 | >4    | >16    | 2     | <i>C. coli</i>   |
| 2010 | 11C00116   | Turkey_caecum_content | EUCAMP              | <=0,125 | <=1 | 64  | >4    | >16    | <=0,5 | <i>C. jejuni</i> |
| 2010 | 11C00118   | Turkey_caecum_content | EUCAMP              | 0,25    | 2   | 64  | >4    | >16    | >32   | <i>C. coli</i>   |
| 2010 | 11C00120   | Turkey_caecum_content | EUCAMP              | 2       | 16  | >64 | >4    | >16    | 2     | <i>C. coli</i>   |
| 2010 | 11C00122   | Turkey_caecum_content | EUCAMP              | 0,5     | 2   | 64  | >4    | >16    | >32   | <i>C. coli</i>   |
| 2010 | 11C00124-1 | Turkey_caecum_content | EUCAMP              | 0,5     | 4   | 64  | >4    | >16    | >32   | <i>C. coli</i>   |
| 2010 | 11C00124-2 | Turkey_caecum_content | EUCAMP              | 0,25    | <=1 | <=2 | >4    | >16    | <=0,5 | <i>C. jejuni</i> |
| 2010 | 11C00126   | Turkey_caecum_content | EUCAMP              | 0,25    | <=1 | 64  | >4    | >16    | <=0,5 | <i>C. jejuni</i> |
| 2010 | 11C00131   | Turkey_caecum_content | EUCAMP              | 0,5     | 2   | 64  | >4    | >16    | >32   | <i>C. coli</i>   |
| 2010 | 11C00133   | Turkey_caecum_content | EUCAMP              | 0,5     | 2   | 4   | 0,25  | <=0,25 | <=0,5 | <i>C. jejuni</i> |
| 2010 | 11C00135   | Turkey_caecum_content | EUCAMP              | 0,25    | <=1 | >64 | >4    | >16    | 1     | <i>C. jejuni</i> |

Table S5: Minimum inhibitory concentrations of 6 antimicrobials for isolats of *C. jejuni* and *C. coli* from poultry

| Year | Sample No. | Matrix_final           | Antimicrobial panel | GEN      | STR   | NAL      | CIP          | TET    | ERY | Species          |
|------|------------|------------------------|---------------------|----------|-------|----------|--------------|--------|-----|------------------|
| 2010 | 11C00137   | Turkey_caecum_content  | EUCAMP              | 1        | 2 >64 | >4       | >16          | >32    |     | <i>C. coli</i>   |
| 2010 | 11C00139   | Turkey_caecum_content  | EUCAMP              | <=0,125  | <=1   | 8        | 1 >16        | <=0,5  |     | <i>C. jejuni</i> |
| 2010 | 11C00141   | Turkey_caecum_content  | EUCAMP              | 1        | 8 >64 | >4       | >16          |        | 2   | <i>C. coli</i>   |
| 2010 | 11C00228   | Turkey_caecum_content  | EUCAMP              | 1 >16    |       | 4        | 0,125 >16    |        | 2   | <i>C. coli</i>   |
| 2011 | 11C00375   | Broiler_caecum_content | EUCAMP              | 0,25 >16 |       | 4 <=0,06 | <=0,25       | <=0,5  |     | <i>C. jejuni</i> |
| 2011 | 11C00377   | Broiler_caecum_content | EUCAMP              | 0,25     | 1     | 32 >4    | >16          | <=0,5  |     | <i>C. jejuni</i> |
| 2011 | 11C00381   | Broiler_caecum_content | EUCAMP              | 0,5      | 2     | 8        | 0,5 <=0,25   |        | 2   | <i>C. jejuni</i> |
| 2011 | 11C00383   | Broiler_caecum_content | EUCAMP              | 0,25     | 1     | 64 >4    |              | 16 >32 |     | <i>C. jejuni</i> |
| 2011 | 11C00386   | Broiler_caecum_content | EUCAMP              | 0,5      | 1     | 4        | 0,25 <=0,25  |        | 1   | <i>C. jejuni</i> |
| 2011 | 11C00438   | Broiler_caecum_content | EUCAMP              | 1        | 2     | 4        | 0,125 <=0,25 |        | 1   | <i>C. jejuni</i> |
| 2011 | 11C00439   | Broiler_caecum_content | EUCAMP              | 0,5      | 2     | 4        | <=0,06 >16   | <=0,5  |     | <i>C. jejuni</i> |
| 2011 | 11C00460   | Broiler_caecum_content | EUCAMP              | 0,5      | 2     | 64       | >4 <=0,25    | <=0,5  |     | <i>C. coli</i>   |
| 2011 | 11C00470   | Broiler_caecum_content | EUCAMP              | 0,5      | 2     | 64       | >4 >16       | <=0,5  |     | <i>C. coli</i>   |
| 2011 | 11C00517   | Broiler_caecum_content | EUCAMP              | 0,5      | 1     | 64       | >4           | 1      |     | <i>C. jejuni</i> |
| 2011 | 11C00518   | Broiler_caecum_content | EUCAMP              | 0,25     | 1 >64 | >4       |              | 1      |     | <i>C. jejuni</i> |
| 2011 | 11C00544   | Broiler_caecum_content | EUCAMP              | 0,5      | 2     | 4        | 0,125 <=0,25 |        | 1   | <i>C. jejuni</i> |
| 2011 | 11C00569   | Broiler_caecum_content | EUCAMP              | 0,5      | >16   | 64       | >4 >16       | >32    |     | <i>C. coli</i>   |
| 2011 | 11C00596   | Broiler_caecum_content | EUCAMP              | 1 >16    | >64   | >4       | >16          |        | 2   | <i>C. coli</i>   |
| 2011 | 11C00597   | Broiler_caecum_content | EUCAMP              | 0,25 >16 |       | 32 >4    | >16          | <=0,5  |     | <i>C. jejuni</i> |
| 2011 | 11C00604   | Broiler_caecum_content | EUCAMP              | 0,25     | 1     | 4        | 0,125 >16    | <=0,5  |     | <i>C. jejuni</i> |
| 2011 | 11C00658   | Broiler_caecum_content | EUCAMP              | 0,5      | 1     | 64       | >4 >16       |        | 1   | <i>C. jejuni</i> |
| 2011 | 11C00766   | Broiler_caecum_content | EUCAMP              | <=0,125  | 8 <=2 | <=0,06   | <=0,25       | <=0,5  |     | <i>C. jejuni</i> |
| 2011 | 11C00768   | Broiler_caecum_content | EUCAMP              | 0,25     | 1     | 32 >4    | >16          | <=0,5  |     | <i>C. jejuni</i> |
| 2011 | 11C00772   | Broiler_caecum_content | EUCAMP              | 0,5      | 2     | 16       | 1            | 0,5    |     | <i>C. jejuni</i> |
| 2011 | 11C00774   | Broiler_caecum_content | EUCAMP              | 0,25     | 1     | 32 >4    |              | 16 >32 |     | <i>C. jejuni</i> |
| 2011 | 11C00776   | Broiler_caecum_content | EUCAMP              | 0,25     | 1     | 4        | 0,25 <=0,25  |        | 1   | <i>C. jejuni</i> |
| 2011 | 11C00777   | Broiler_caecum_content | EUCAMP              | 0,25     | 1     | 64 >4    | >16          | <=0,5  |     | <i>C. jejuni</i> |
| 2011 | 11C00779   | Broiler_caecum_content | EUCAMP              | 0,5      | 1     | 4        | 0,125 >16    | <=0,5  |     | <i>C. jejuni</i> |
| 2011 | 11C00780   | Broiler_caecum_content | EUCAMP              | 0,25     | 1     | 32 >4    | <=0,25       | <=0,5  |     | <i>C. jejuni</i> |
| 2011 | 11C00790   | Broiler_caecum_content | EUCAMP              | <=0,125  | 1     | 8 >4     | <=0,25       | <=0,5  |     | <i>C. coli</i>   |
| 2011 | 11C00792   | Broiler_caecum_content | EUCAMP              | 0,5      | 1     | 4        | 0,25 <=0,25  |        | 1   | <i>C. jejuni</i> |
| 2011 | 11C00793   | Broiler_caecum_content | EUCAMP              | 0,5      | 1     | 8        | 0,5 <=0,25   | >32    |     | <i>C. coli</i>   |

Table S5: Minimum inhibitory concentrations of 6 antimicrobials for isolats of *C. jejuni* and *C. coli* from poultry

| Year | Sample No. | Matrix_final           | Antimicrobial panel | GEN     | STR   | NAL   | CIP    | TET    | ERY   | Species          |
|------|------------|------------------------|---------------------|---------|-------|-------|--------|--------|-------|------------------|
| 2011 | 11C00794   | Broiler_caecum_content | EUCAMP              | 0,5     | 2     | 32    | >4     | >16    | >32   | <i>C. coli</i>   |
| 2011 | 11C00796   | Broiler_caecum_content | EUCAMP              | 0,5     | 2     | 64    | >4     | <=0,25 | <=0,5 | <i>C. jejuni</i> |
| 2011 | 11C00799   | Broiler_caecum_content | EUCAMP              | 0,25    | 1     | 64 >4 | >16    | <=0,5  |       | <i>C. jejuni</i> |
| 2011 | 11C00802   | Broiler_caecum_content | EUCAMP              | 0,5     | 2     | 4     | 0,5    | <=0,25 | <=0,5 | <i>C. jejuni</i> |
| 2011 | 11C00803   | Broiler_caecum_content | EUCAMP              | 0,5     | 1     | 32    | >4     | 16     | <=0,5 | <i>C. coli</i>   |
| 2011 | 11C00805   | Broiler_caecum_content | EUCAMP              | 0,25    | 1     | 32 >4 | >16    | <=0,5  |       | <i>C. jejuni</i> |
| 2011 | 11C00807   | Broiler_caecum_content | EUCAMP              | 0,25    | 1 <=2 | >4    | >16    | <=0,5  |       | <i>C. jejuni</i> |
| 2011 | 11C00809   | Broiler_caecum_content | EUCAMP              | 0,5     | 2     | >64   | >4     | >16    | <=0,5 | <i>C. jejuni</i> |
| 2011 | 11C00811   | Broiler_caecum_content | EUCAMP              | 0,25    | 1     | 32 >4 | <=0,25 | <=0,5  |       | <i>C. jejuni</i> |
| 2011 | 11C00812   | Broiler_caecum_content | EUCAMP              | 0,25    | 1     | 64 >4 | >16    |        | 1     | <i>C. jejuni</i> |
| 2011 | 11C00814   | Broiler_caecum_content | EUCAMP              | 0,5     | 2     | >64   | >4     | >16    | <=0,5 | <i>C. coli</i>   |
| 2011 | 11C00816   | Broiler_caecum_content | EUCAMP              | 0,5     | >16   | 64    | >4     | >16    | >32   | <i>C. coli</i>   |
| 2011 | 11C00818   | Broiler_caecum_content | EUCAMP              | <=0,125 | 1     | 64 >4 | <=0,25 |        | 1     | <i>C. jejuni</i> |
| 2011 | 11C00820   | Broiler_caecum_content | EUCAMP              | <=0,125 | 1     | 64 >4 | >16    |        | 4     | <i>C. jejuni</i> |
| 2011 | 11C00822   | Broiler_caecum_content | EUCAMP              | 0,5     | 1     | 64    | >4     | <=0,25 | <=0,5 | <i>C. coli</i>   |
| 2011 | 11C00824   | Broiler_caecum_content | EUCAMP              | 0,5     | 1     | 64    | >4     | <=0,25 | <=0,5 | <i>C. coli</i>   |
| 2011 | 11C00825   | Broiler_caecum_content | EUCAMP              | 0,5     | 4     | 64    | >4     | >16    | >32   | <i>C. coli</i>   |
| 2011 | 11C00825   | Broiler_caecum_content | EUCAMP              | 0,5     | 1     | <=2   | 0,125  | >16    | <=0,5 | <i>C. jejuni</i> |
| 2011 | 11C00827   | Broiler_caecum_content | EUCAMP              | 0,5     | 2     | 64    | >4     | >16    | 2     | <i>C. coli</i>   |
| 2011 | 11C00828   | Broiler_caecum_content | EUCAMP              | 0,5     | 1     | 64    | >4     | >16    | 2     | <i>C. coli</i>   |
| 2011 | 11C00830   | Broiler_caecum_content | EUCAMP              | 0,5     | 2     | 64    | >4     | >16    | 2     | <i>C. coli</i>   |
| 2011 | 11C00832   | Broiler_caecum_content | EUCAMP              | 0,5     | 1     | 64    | >4     | >16    | 1     | <i>C. coli</i>   |
| 2011 | 11C00834   | Broiler_caecum_content | EUCAMP              | 0,25    | 1     | 4     | 0,125  | >16    | <=0,5 | <i>C. jejuni</i> |
| 2011 | 11C00835   | Broiler_caecum_content | EUCAMP              | 0,25    | 1     | 16 >4 | >16    | <=0,5  |       | <i>C. jejuni</i> |
| 2011 | 11C00837   | Broiler_caecum_content | EUCAMP              | 0,5     | 2     | 64    | >4     | >16    | >32   | <i>C. coli</i>   |
| 2011 | 11C00839   | Broiler_caecum_content | EUCAMP              | 0,5     | 1     | 4     | 0,125  | >16    | 1     | <i>C. jejuni</i> |
| 2011 | 11C00841   | Broiler_caecum_content | EUCAMP              | 0,25    | 1     | 64 >4 | <=0,25 |        | 2     | <i>C. jejuni</i> |
| 2011 | 11C01012   | Broiler_caecum_content | EUCAMP              | 1       | 1     | 64 >4 | <=0,25 |        | 1     | <i>C. jejuni</i> |
| 2011 | 11C01013   | Broiler_caecum_content | EUCAMP              | 0,5     | 1     | >64   | >4     | <=0,25 | <=0,5 | <i>C. jejuni</i> |
| 2011 | 12C00025   | Broiler_caecum_content | EUCAMP              | 0,5     | 2     | >64   | >4     | <=0,25 | 2     | <i>C. jejuni</i> |
| 2011 | 12C00030   | Broiler_caecum_content | EUCAMP              | 0,5     | 1     | 64    | >4     | >16    | 2     | <i>C. coli</i>   |
| 2011 | 12C00032   | Broiler_caecum_content | EUCAMP              | 0,25    | 1     | 32    | 4      | 16     | <=0,5 | <i>C. jejuni</i> |

Table S5: Minimum inhibitory concentrations of 6 antimicrobials for isolats of *C. jejuni* and *C. coli* from poultry

| Year | Sample No. | Matrix_final           | Antimicrobial panel | GEN    | STR | NAL | CIP   | TET   | ERY  | Species          |
|------|------------|------------------------|---------------------|--------|-----|-----|-------|-------|------|------------------|
| 2011 | 12C00033   | Broiler_caecum_content | EUCAMP              | 0,5    | 2   | >64 | >4    | >16   | 2    | <i>C. coli</i>   |
| 2011 | 12C00035   | Broiler_caecum_content | EUCAMP              | ≤0,125 | 1   | 32  | 4     | ≤0,25 | ≤0,5 | <i>C. jejuni</i> |
| 2011 | 12C00037   | Broiler_caecum_content | EUCAMP              | 0,25   | 1   | 32  | >4    | >16   | 2    | <i>C. jejuni</i> |
| 2011 | 12C00038   | Broiler_caecum_content | EUCAMP              | ≤0,125 | 1   | 4   | 0,25  | ≤0,25 | ≤0,5 | <i>C. jejuni</i> |
| 2011 | 12C00041   | Broiler_caecum_content | EUCAMP              | 0,5    | 2   | ≤2  | 0,125 | ≤0,25 | ≤0,5 | <i>C. jejuni</i> |
| 2011 | 12C00043   | Broiler_caecum_content | EUCAMP              | 0,25   | 1   | 16  | 4     | ≤0,25 | ≤0,5 | <i>C. jejuni</i> |
| 2011 | 12C00044   | Broiler_caecum_content | EUCAMP              | 0,25   | 1   | 32  | >4    | >16   | ≤0,5 | <i>C. jejuni</i> |
| 2011 | 12C00046   | Broiler_caecum_content | EUCAMP              | ≤0,125 | 1   | 64  | >4    | ≤0,25 | 2    | <i>C. jejuni</i> |
| 2011 | 12C00048   | Broiler_caecum_content | EUCAMP              | 0,5    | 1   | 64  | >4    | >16   | ≤0,5 | <i>C. jejuni</i> |
| 2011 | 12C00050   | Broiler_caecum_content | EUCAMP              | 0,5    | 2   | >64 | >4    | >16   | 2    | <i>C. coli</i>   |
| 2011 | 12C00053   | Broiler_caecum_content | EUCAMP              | 0,5    | 2   | 64  | >4    | >16   | >32  | <i>C. coli</i>   |
| 2011 | 12C00055   | Broiler_caecum_content | EUCAMP              | ≤0,125 | 1   | 8   | 0,5   | ≤0,25 | 1    | <i>C. jejuni</i> |
| 2011 | 12C00057   | Broiler_caecum_content | EUCAMP              | 0,5    | 2   | 64  | >4    | >16   | >32  | <i>C. coli</i>   |
| 2011 | 12C00059   | Broiler_caecum_content | EUCAMP              | 0,25   | 1   | >64 | >4    | >16   | 2    | <i>C. jejuni</i> |
| 2011 | 12C00061   | Broiler_caecum_content | EUCAMP              | 0,25   | 1   | 32  | >4    | >16   | ≤0,5 | <i>C. jejuni</i> |
| 2011 | 12C00063   | Broiler_caecum_content | EUCAMP              | 0,25   | 1   | ≤2  | ≤0,06 | ≤0,25 | ≤0,5 | <i>C. jejuni</i> |
| 2011 | 12C00066   | Broiler_caecum_content | EUCAMP              | 0,25   | 1   | >64 | >4    | >16   | 2    | <i>C. jejuni</i> |
| 2011 | 12C00067   | Broiler_caecum_content | EUCAMP              | 0,5    | 2   | 64  | >4    | >16   | 2    | <i>C. coli</i>   |
| 2011 | 12C00069   | Broiler_caecum_content | EUCAMP              | 0,5    | 2   | >64 | >4    | ≤0,25 | ≤0,5 | <i>C. jejuni</i> |
| 2011 | 12C00070   | Broiler_caecum_content | EUCAMP              | ≤0,125 | 1   | 32  | >4    | ≤0,25 | ≤0,5 | <i>C. jejuni</i> |
| 2011 | 12C00072   | Broiler_caecum_content | EUCAMP              | 0,25   | 1   | 64  | >4    | >16   | 1    | <i>C. jejuni</i> |
| 2011 | 12C00075   | Broiler_caecum_content | EUCAMP              | ≤0,125 | 1   | 8   | 0,25  | >16   | ≤0,5 | <i>C. jejuni</i> |
| 2011 | 12C00077   | Broiler_caecum_content | EUCAMP              | ≤0,125 | 1   | 4   | ≤0,06 | 4     | ≤0,5 | <i>C. jejuni</i> |
| 2011 | 12C00078   | Broiler_caecum_content | EUCAMP              | 0,25   | 1   | 32  | 4     | ≤0,25 | ≤0,5 | <i>C. jejuni</i> |
| 2011 | 12C00308   | Broiler_caecum_content | EUCAMP              | 0,5    | 2   | 8   | 0,25  | >16   | ≤0,5 | <i>C. coli</i>   |
| 2012 | 12C00210   | Turkey_caecum_content  | EUCAMP              | 0,5    | 2   | 8   | 0,5   | ≤0,25 | 1    | <i>C. coli</i>   |
| 2012 | 12C00212   | Turkey_caecum_content  | EUCAMP              | 0,5    | 4   | >64 | >4    | >16   | 2    | <i>C. coli</i>   |
| 2012 | 12C00245   | Turkey_caecum_content  | EUCAMP              | 0,5    | 4   | 64  | >4    | >16   | ≤0,5 | <i>C. jejuni</i> |
| 2012 | 12C00247   | Turkey_caecum_content  | EUCAMP              | 0,5    | 2   | 64  | >4    | >16   | 1    | <i>C. coli</i>   |
| 2012 | 12C00248   | Turkey_caecum_content  | EUCAMP              | ≤0,125 | ≤1  | 4   | ≤0,06 | ≤0,25 | ≤0,5 | <i>C. jejuni</i> |
| 2012 | 12C00253   | Turkey_caecum_content  | EUCAMP              | 0,25   | 1   | >64 | >4    | >16   | 1    | <i>C. coli</i>   |
| 2012 | 12C00254   | Turkey_caecum_content  | EUCAMP              | 0,5    | ≤1  | >64 | >4    | >16   | ≤0,5 | <i>C. jejuni</i> |

Table S5: Minimum inhibitory concentrations of 6 antimicrobials for isolats of *C. jejuni* and *C. coli* from poultry

| Year | Sample No. | Matrix_final          | Antimicrobial panel | GEN     | STR | NAL   | CIP    | TET      | ERY   | Species          |
|------|------------|-----------------------|---------------------|---------|-----|-------|--------|----------|-------|------------------|
| 2012 | 12C00255   | Turkey_caecum_content | EUCAMP              | 0,25    | 1   | 64 >4 | >16    | >32      |       | <i>C. coli</i>   |
| 2012 | 12C00256   | Turkey_caecum_content | EUCAMP              | <=0,125 | <=1 | 16 >4 |        | 16 <=0,5 |       | <i>C. jejuni</i> |
| 2012 | 12C00258   | Turkey_caecum_content | EUCAMP              | 0,25    | 1   | 64 >4 | >16    |          | 1     | <i>C. coli</i>   |
| 2012 | 12C00259   | Turkey_caecum_content | EUCAMP              | 0,5     | 2   | 32    | >4     | >16      | >32   | <i>C. coli</i>   |
| 2012 | 12C00265   | Turkey_caecum_content | EUCAMP              | <=0,125 | 4   | 32 >4 | >16    | <=0,5    |       | <i>C. coli</i>   |
| 2012 | 12C00269   | Turkey_caecum_content | EUCAMP              | 0,5     | 2   | 64    | >4     | >16      | 2     | <i>C. jejuni</i> |
| 2012 | 12C00271   | Turkey_caecum_content | EUCAMP              | 0,5     | 1   | >64   | >4     | >16      | <=0,5 | <i>C. coli</i>   |
| 2012 | 12C00273   | Turkey_caecum_content | EUCAMP              | 0,5     | 1   | 32    | >4     | >16      | >32   | <i>C. coli</i>   |
| 2012 | 12C00284   | Turkey_caecum_content | EUCAMP              | 0,5     | 2   | >64   | >4     | <=0,25   | <=0,5 | <i>C. jejuni</i> |
| 2012 | 12C00288   | Turkey_caecum_content | EUCAMP              | <=0,125 | <=1 | 4     | 0,120  | 16       | <=0,5 | <i>C. jejuni</i> |
| 2012 | 12C00293   | Turkey_caecum_content | EUCAMP              | <=0,125 | <=1 | 4     | <=0,06 | <=0,25   | <=0,5 | <i>C. jejuni</i> |
| 2012 | 12C00302   | Turkey_caecum_content | EUCAMP              | 0,25    | 1   | 32 >4 | >16    | >32      |       | <i>C. coli</i>   |
| 2012 | 12C00320   | Turkey_caecum_content | EUCAMP              | 0,25    | <=1 | 64 >4 | <=0,25 | <=0,5    |       | <i>C. jejuni</i> |
| 2012 | 12C00322   | Turkey_caecum_content | EUCAMP              | 0,5     | <=1 | 64    | >4     | >16      | <=0,5 | <i>C. jejuni</i> |
| 2012 | 12C00326   | Turkey_caecum_content | EUCAMP              | <=0,125 | 16  | 64 >4 | >16    | <=0,5    |       | <i>C. jejuni</i> |
| 2012 | 12C00328   | Turkey_caecum_content | EUCAMP              | 1       | >16 | 64 >4 | >16    |          | 1     | <i>C. jejuni</i> |
| 2012 | 12C00358   | Turkey_caecum_content | EUCAMP              | 0,5     | 2   | 64    | >4     | >16      | 2     | <i>C. coli</i>   |
| 2012 | 12C00359   | Turkey_caecum_content | EUCAMP              | 0,5     | 1   | 64    | >4     | >16      | >32   | <i>C. coli</i>   |
| 2012 | 12C00360   | Turkey_caecum_content | EUCAMP              | 0,5     | 4   | 8     | 0,25   | <=0,25   | 1     | <i>C. coli</i>   |
| 2012 | 12C00361   | Turkey_caecum_content | EUCAMP              | 1       | 2   | 32 >4 | >16    | <=0,5    |       | <i>C. coli</i>   |
| 2012 | 12C00376   | Turkey_caecum_content | EUCAMP              | 0,25    | <=1 |       | 0,120  | <=0,25   | <=0,5 | <i>C. jejuni</i> |
| 2012 | 12C00379   | Turkey_caecum_content | EUCAMP              | 0,25    | <=1 | 8     | 0,120  | <=0,25   | <=0,5 | <i>C. jejuni</i> |
| 2012 | 12C00382   | Turkey_caecum_content | EUCAMP              | 1       | 8   | >64   | >4     | >16      | 2     | <i>C. coli</i>   |
| 2012 | 12C00410   | Turkey_caecum_content | EUCAMP              | 0,5     | 2   | 64    | >4     | >16      | <=0,5 | <i>C. jejuni</i> |
| 2012 | 12C00413   | Turkey_caecum_content | EUCAMP              | <=0,125 | 2   | 16    | 4      | >16      | <=0,5 | <i>C. coli</i>   |
| 2012 | 12C00414   | Turkey_caecum_content | EUCAMP              | 0,5     | 2   | 64    | >4     | <=0,25   | <=0,5 | <i>C. coli</i>   |
| 2012 | 12C00432   | Turkey_caecum_content | EUCAMP              | 0,5     | 2   | 64    | >4     | >16      | <=0,5 | <i>C. coli</i>   |
| 2012 | 12C00434   | Turkey_caecum_content | EUCAMP              | 0,5     | <=1 | 64    | >4     | >16      | <=0,5 | <i>C. jejuni</i> |
| 2012 | 12C00436   | Turkey_caecum_content | EUCAMP              | 0,25    | <=1 | 4     | 0,25   | <=0,25   | <=0,5 | <i>C. jejuni</i> |
| 2012 | 12C00485   | Turkey_caecum_content | EUCAMP              | 0,5     | 2   | 64    | >4     | >16      | 2     | <i>C. coli</i>   |
| 2012 | 12C00486   | Turkey_caecum_content | EUCAMP              | 0,25    | 2   | 64 >4 | >16    | >32      |       | <i>C. coli</i>   |
| 2012 | 12C00592   | Turkey_caecum_content | EUCAMP              | 0,25    | <=1 | <=2   | >4     | >16      | <=0,5 | <i>C. jejuni</i> |



Table S5: Minimum inhibitory concentrations of 6 antimicrobials for isolats of *C. jejuni* and *C. coli* from poultry

| Year | Sample No. | Matrix_final          | Antimicrobial panel | GEN     | STR | NAL | CIP   | TET    | ERY Species            |
|------|------------|-----------------------|---------------------|---------|-----|-----|-------|--------|------------------------|
| 2012 | 12C00599   | Turkey_caecum_content | EUCAMP              | 0,5     | 2   | 64  | >4    | >16    | 4 <i>C. coli</i>       |
| 2012 | 12C00600   | Turkey_caecum_content | EUCAMP              | 0,5     | 2   | 4   | 0,120 | <=0,25 | 1 <i>C. jejuni</i>     |
| 2012 | 12C00601   | Turkey_caecum_content | EUCAMP              | 0,5     | 2   | 64  | >4    | >16    | 2 <i>C. jejuni</i>     |
| 2012 | 12C00602   | Turkey_caecum_content | EUCAMP              | 0,25    | 2   | 32  | >4    | >16    | 1 <i>C. jejuni</i>     |
| 2012 | 12C00640   | Turkey_caecum_content | EUCAMP              | <=0,125 | 1   | 32  | 4     | 8      | <=0,5 <i>C. coli</i>   |
| 2012 | 12C00658   | Turkey_caecum_content | EUCAMP              | 0,5     | >16 | 64  | >4    | >16    | >32 <i>C. coli</i>     |
| 2012 | 12C00661   | Turkey_caecum_content | EUCAMP              | 1       | >16 | >64 | >4    | >16    | 2 <i>C. coli</i>       |
| 2012 | 12C00661   | Turkey_caecum_content | EUCAMP              | 1       | >16 | 64  | >4    | >16    | 2 <i>C. jejuni</i>     |
| 2012 | 12C00662   | Turkey_caecum_content | EUCAMP              | <=0,125 | <=1 | 32  | >4    | >16    | <=0,5 <i>C. jejuni</i> |
| 2012 | 12C00723   | Turkey_caecum_content | EUCAMP              | 1       | 4   | 64  | >4    | >16    | 2 <i>C. coli</i>       |
| 2012 | 12C00731   | Turkey_caecum_content | EUCAMP              | 0,5     | 1   | 32  | >4    | >16    | >32 <i>C. coli</i>     |
| 2012 | 12C00732   | Turkey_caecum_content | EUCAMP              | 0,5     | <=1 | 32  | >4    | >16    | 1 <i>C. jejuni</i>     |
| 2012 | 12C00769   | Turkey_caecum_content | EUCAMP              | <=0,125 | >16 | <=2 | >4    | >16    | <=0,5 <i>C. jejuni</i> |
| 2012 | 12C00771   | Turkey_caecum_content | EUCAMP              | 0,5     | 4   | 8   | 0,120 | >16    | 2 <i>C. coli</i>       |
| 2012 | 12C00772   | Turkey_caecum_content | EUCAMP              | 0,25    | 2   | 16  | >4    | 16     | 1 <i>C. coli</i>       |
| 2012 | 12C00775   | Turkey_caecum_content | EUCAMP              | 0,25    | >16 | 64  | >4    | >16    | 4 <i>C. coli</i>       |
| 2012 | 12C00781   | Turkey_caecum_content | EUCAMP              | 0,5     | >16 | 64  | >4    | >16    | 8 <i>C. coli</i>       |
| 2012 | 12C00783   | Turkey_caecum_content | EUCAMP              | 0,5     | 2   | 4   | 0,25  | <=0,25 | 1 <i>C. jejuni</i>     |
| 2012 | 12C00785   | Turkey_caecum_content | EUCAMP              | 0,25    | >16 | 16  | >4    | >16    | >32 <i>C. coli</i>     |
| 2012 | 12C00791   | Turkey_caecum_content | EUCAMP              | 0,5     | 2   | 64  | >4    | >16    | >32 <i>C. coli</i>     |
| 2012 | 12C00794   | Turkey_caecum_content | EUCAMP              | 0,5     | 4   | >64 | >4    | >16    | >32 <i>C. coli</i>     |
| 2012 | 12C00796   | Turkey_caecum_content | EUCAMP              | 0,5     | 2   | 64  | >4    | >16    | >32 <i>C. coli</i>     |
| 2012 | 12C00797   | Turkey_caecum_content | EUCAMP              | 0,25    | 1   | 64  | >4    | >16    | >32 <i>C. coli</i>     |
| 2012 | 12C00798   | Turkey_caecum_content | EUCAMP              | 0,25    | <=1 | 32  | 4     | 16     | 1 <i>C. jejuni</i>     |
| 2012 | 12C00800   | Turkey_caecum_content | EUCAMP              | 0,5     | 2   | >64 | >4    | >16    | 2 <i>C. coli</i>       |
| 2012 | 12C00801   | Turkey_caecum_content | EUCAMP              | 0,5     | 2   | <=2 | 0,120 | <=0,25 | 1 <i>C. jejuni</i>     |
| 2012 | 12C00804   | Turkey_caecum_content | EUCAMP              | 0,5     | 2   | 64  | >4    | >16    | >32 <i>C. coli</i>     |
| 2012 | 12C00806   | Turkey_caecum_content | EUCAMP              | 0,5     | <=1 | 4   | 0,120 | <=0,25 | 1 <i>C. jejuni</i>     |
| 2012 | 12C00808   | Turkey_caecum_content | EUCAMP              | 0,5     | 2   | >64 | >4    | >16    | >32 <i>C. coli</i>     |
| 2012 | 12C00809   | Turkey_caecum_content | EUCAMP              | 0,5     | 2   | >64 | >4    | >16    | 2 <i>C. coli</i>       |
| 2012 | 12C00810   | Turkey_caecum_content | EUCAMP              | 0,5     | 1   | 64  | >4    | >16    | <=0,5 <i>C. coli</i>   |
| 2012 | 12C00811   | Turkey_caecum_content | EUCAMP              | 0,5     | 1   | 64  | >4    | >16    | 2 <i>C. coli</i>       |

Table S5: Minimum inhibitory concentrations of 6 antimicrobials for isolats of *C. jejuni* and *C. coli* from poultry

| Year | Sample No. | Matrix_final          | Antimicrobial panel | GEN     | STR | NAL | CIP   | TET    | ERY   | Species            |
|------|------------|-----------------------|---------------------|---------|-----|-----|-------|--------|-------|--------------------|
| 2012 | 12C00812   | Turkey_caecum_content | EUCAMP              | 0,25    | >16 | 64  | >4    | >16    | >32   | <i>C. coli</i>     |
| 2012 | 12C00813   | Turkey_caecum_content | EUCAMP              | 0,25    | 2   | >64 | >4    | >16    |       | 2 <i>C. coli</i>   |
| 2012 | 12C00814   | Turkey_caecum_content | EUCAMP              | 0,5     | <=1 | 32  | >4    | >16    | <=0,5 | <i>C. jejuni</i>   |
| 2012 | 12C00816   | Turkey_caecum_content | EUCAMP              | 0,5     | 2   | 64  | >4    | >16    |       | 2 <i>C. jejuni</i> |
| 2012 | 12C00818   | Turkey_caecum_content | EUCAMP              | 0,5     | <=1 | 64  | >4    | >16    | <=0,5 | <i>C. jejuni</i>   |
| 2012 | 12C00820   | Turkey_caecum_content | EUCAMP              | 0,5     | 1   | 64  | >4    | >16    | >32   | <i>C. coli</i>     |
| 2012 | 12C00821   | Turkey_caecum_content | EUCAMP              | 0,5     | 4   | 8   | 0,25  | >16    | <=0,5 | <i>C. jejuni</i>   |
| 2012 | 12C00827   | Turkey_caecum_content | EUCAMP              | 0,5     | 2   | 64  | >4    | 0,5    |       | 2 <i>C. jejuni</i> |
| 2012 | 12C00834   | Turkey_caecum_content | EUCAMP              | 0,5     | 2   | 64  | >4    | >16    |       | 2 <i>C. coli</i>   |
| 2012 | 12C00836   | Turkey_caecum_content | EUCAMP              | 0,25    | <=1 | 4   | 0,25  | <=0,25 | <=0,5 | <i>C. jejuni</i>   |
| 2012 | 12C00838   | Turkey_caecum_content | EUCAMP              | <=0,125 | >16 | <=2 | >4    | >16    | <=0,5 | <i>C. jejuni</i>   |
| 2012 | 12C00840   | Turkey_caecum_content | EUCAMP              | 0,5     | 4   | 64  | >4    | >16    | >32   | <i>C. coli</i>     |
| 2012 | 12C00841   | Turkey_caecum_content | EUCAMP              | 0,5     | 2   | 64  | >4    | >16    | >32   | <i>C. coli</i>     |
| 2012 | 12C00847   | Turkey_caecum_content | EUCAMP              | 1       | 2   | 64  | >4    | >16    |       | 2 <i>C. coli</i>   |
| 2012 | 12C00848   | Turkey_caecum_content | EUCAMP              | 0,5     | 2   | 64  | >4    | >16    |       | 1 <i>C. jejuni</i> |
| 2012 | 12C00850   | Turkey_caecum_content | EUCAMP              | 0,5     | 2   | 64  | >4    | >16    | >32   | <i>C. coli</i>     |
| 2012 | 12C00851   | Turkey_caecum_content | EUCAMP              | 0,5     | 2   | <=2 | >4    | <=0,25 | <=0,5 | <i>C. jejuni</i>   |
| 2012 | 12C00853   | Turkey_caecum_content | EUCAMP              | 0,5     | 2   | 64  | >4    | >16    |       | 4 <i>C. coli</i>   |
| 2012 | 12C00856   | Turkey_caecum_content | EUCAMP              | 0,5     | <=1 | 64  | >4    | >16    |       | 2 <i>C. jejuni</i> |
| 2012 | 12C00857   | Turkey_caecum_content | EUCAMP              | 0,25    | 4   | >64 | >4    | >16    |       | 2 <i>C. coli</i>   |
| 2012 | 12C00859   | Turkey_caecum_content | EUCAMP              | 0,5     | 2   | 4   | 0,25  | <=0,25 |       | 2 <i>C. jejuni</i> |
| 2012 | 12C00861   | Turkey_caecum_content | EUCAMP              | 0,25    | <=1 | 8   | 0,25  | <=0,25 |       | 2 <i>C. jejuni</i> |
| 2012 | 12C00868   | Turkey_caecum_content | EUCAMP              | 0,5     | 2   | 8   | 0,5   | >16    |       | 4 <i>C. coli</i>   |
| 2012 | 12C00870   | Turkey_caecum_content | EUCAMP              | 0,5     | <=1 | 32  | >4    | <=0,25 | <=0,5 | <i>C. jejuni</i>   |
| 2012 | 12C00871   | Turkey_caecum_content | EUCAMP              | <=0,125 | 1   | 16  | >4    | >16    | >32   | <i>C. coli</i>     |
| 2012 | 12C00873   | Turkey_caecum_content | EUCAMP              | 0,25    | <=1 | <=2 | 0,120 | >16    | <=0,5 | <i>C. jejuni</i>   |
| 2012 | 12C00874   | Turkey_caecum_content | EUCAMP              | 0,25    | <=1 | 16  | >4    | >16    | <=0,5 | <i>C. jejuni</i>   |
| 2012 | 12C00875   | Turkey_caecum_content | EUCAMP              | 0,5     | 1   | >64 | >4    | >16    |       | 1 <i>C. coli</i>   |
| 2012 | 12C00891   | Turkey_caecum_content | EUCAMP              | <=0,125 | <=1 | 16  | >4    | >16    | <=0,5 | <i>C. jejuni</i>   |
| 2012 | 12C00892   | Turkey_caecum_content | EUCAMP              | 0,5     | <=1 | 8   | 0,5   | >16    | <=0,5 | <i>C. jejuni</i>   |
| 2012 | 12C00893   | Turkey_caecum_content | EUCAMP              | 0,5     | <=1 | 64  | >4    | >16    | <=0,5 | <i>C. jejuni</i>   |
| 2012 | 12C00902   | Turkey_caecum_content | EUCAMP              | 0,25    | <=1 | 4   | 0,120 | 0,5    | <=0,5 | <i>C. jejuni</i>   |

Table S5: Minimum inhibitory concentrations of 6 antimicrobials for isolats of *C. jejuni* and *C. coli* from poultry

| Year | Sample No. | Matrix_final          | Antimicrobial panel | GEN     | STR | NAL | CIP   | TET    | ERY   | Species          |
|------|------------|-----------------------|---------------------|---------|-----|-----|-------|--------|-------|------------------|
| 2012 | 12C00918   | Turkey_caecum_content | EUCAMP              | 0,25    | <=1 | 32  | >4    | >16    | <=0,5 | <i>C. jejuni</i> |
| 2012 | 12C00919   | Turkey_caecum_content | EUCAMP              | 0,5     | >16 | 32  | >4    | >16    | <=0,5 | <i>C. jejuni</i> |
| 2012 | 12C00920   | Turkey_caecum_content | EUCAMP              | 0,25    | >16 | 32  | >4    | >16    | <=0,5 | <i>C. jejuni</i> |
| 2012 | 12C00946   | Turkey_caecum_content | EUCAMP              | 0,5     | >16 | 32  | >4    | >16    | 1     | <i>C. coli</i>   |
| 2012 | 12C00947   | Turkey_caecum_content | EUCAMP              | 0,5     | 2   | >64 | >4    | >16    | 1     | <i>C. jejuni</i> |
| 2012 | 12C00966   | Turkey_caecum_content | EUCAMP              | 0,5     | 4   | 64  | >4    | >16    | 4     | <i>C. coli</i>   |
| 2012 | 12C00967   | Turkey_caecum_content | EUCAMP              | 0,25    | 2   | 64  | >4    | >16    | 2     | <i>C. coli</i>   |
| 2012 | 12C00968   | Turkey_caecum_content | EUCAMP              | 0,5     | <=1 | <=2 | >4    | <=0,25 | <=0,5 | <i>C. jejuni</i> |
| 2012 | 12-CA01022 | Turkey_caecum_content | EUCAMP              | 0,5     | 2   | 64  | >4    | 0,5    | 1     | <i>C. coli</i>   |
| 2012 | 12-CA01052 | Turkey_caecum_content | EUCAMP              | <=0,125 | <=1 | 32  | >4    | >16    | <=0,5 | <i>C. jejuni</i> |
| 2012 | 12-CA01053 | Turkey_caecum_content | EUCAMP              | 0,25    | <=1 | 32  | >4    | >16    | <=0,5 | <i>C. jejuni</i> |
| 2012 | 12-CA01066 | Turkey_caecum_content | EUCAMP              | <=0,125 | <=1 | 64  | >4    | >16    | 1     | <i>C. jejuni</i> |
| 2012 | 12-CA01067 | Turkey_caecum_content | EUCAMP              | 0,5     | 2   | 4   | 0,120 | >16    | 1     | <i>C. jejuni</i> |
| 2012 | 12-CA01072 | Turkey_caecum_content | EUCAMP              | 0,25    | >16 | 32  | >4    | >16    | >32   | <i>C. coli</i>   |
| 2012 | 12-CA01078 | Turkey_caecum_content | EUCAMP              | 0,5     | 2   | 64  | >4    | >16    | 2     | <i>C. coli</i>   |
| 2012 | 12-CA01079 | Turkey_caecum_content | EUCAMP              | 0,25    | 1   | 8   | 0,5   | >16    | <=0,5 | <i>C. coli</i>   |
| 2012 | 12-CA01081 | Turkey_caecum_content | EUCAMP              | 0,25    | <=1 | 4   | 0,120 | <=0,25 | <=0,5 | <i>C. jejuni</i> |
| 2012 | 12-CA01120 | Turkey_caecum_content | EUCAMP              | 0,25    | <=1 | 32  | >4    | <=0,25 | 1     | <i>C. jejuni</i> |
| 2012 | 12-CA01122 | Turkey_caecum_content | EUCAMP              | 0,5     | 2   | 64  | >4    | <=0,25 | <=0,5 | <i>C. jejuni</i> |
| 2012 | 12-CA01126 | Turkey_caecum_content | EUCAMP              | 0,5     | <=1 | <=2 | >4    | >16    | <=0,5 | <i>C. jejuni</i> |
| 2012 | 12-CA01142 | Turkey_caecum_content | EUCAMP              | 0,5     | >16 | 64  | >4    | >16    | >32   | <i>C. coli</i>   |
| 2012 | 12-CA01143 | Turkey_caecum_content | EUCAMP              | 0,25    | <=1 | 4   | 0,120 | >16    | <=0,5 | <i>C. jejuni</i> |
| 2012 | 12-CA01145 | Turkey_caecum_content | EUCAMP              | 0,25    | <=1 | 32  | >4    | >16    | 1     | <i>C. jejuni</i> |
| 2012 | 12-CA01146 | Turkey_caecum_content | EUCAMP              | <=0,125 | <=1 | 16  | >4    | >16    | 1     | <i>C. jejuni</i> |
| 2012 | 13-CA00049 | Turkey_caecum_content | EUCAMP              | 0,5     | 2   | 64  | >4    | >16    | 2     | <i>C. jejuni</i> |
| 2012 | 13-CA00051 | Turkey_caecum_content | EUCAMP              | 0,25    | 1   | 4   | 0,120 | <=0,25 | 1     | <i>C. coli</i>   |
| 2012 | 13-CA00053 | Turkey_caecum_content | EUCAMP              | 0,5     | 2   | >64 | >4    | >16    | >32   | <i>C. coli</i>   |
| 2012 | 13-CA00056 | Turkey_caecum_content | EUCAMP              | 0,5     | <=1 | >64 | >4    | >16    | <=0,5 | <i>C. jejuni</i> |
| 2012 | 13-CA00059 | Turkey_caecum_content | EUCAMP              | 0,5     | 1   | 32  | >4    | >16    | 1     | <i>C. coli</i>   |
| 2012 | 13-CA00067 | Turkey_caecum_content | EUCAMP              | 0,5     | <=1 | 64  | >4    | >16    | <=0,5 | <i>C. jejuni</i> |
| 2012 | 13-CA00072 | Turkey_caecum_content | EUCAMP              | 0,5     | >16 | 64  | >4    | 16     | >32   | <i>C. coli</i>   |
| 2012 | 13-CA00072 | Turkey_caecum_content | EUCAMP              | 1       | 2   | 8   | 1     | >16    | 4     | <i>C. jejuni</i> |

Table S5: Minimum inhibitory concentrations of 6 antimicrobials for isolats of *C. jejuni* and *C. coli* from poultry

| Year | Sample No. | Matrix_final           | Antimicrobial panel | GEN     | STR | NAL | CIP    | TET    | ERY   | Species          |
|------|------------|------------------------|---------------------|---------|-----|-----|--------|--------|-------|------------------|
| 2012 | 13-CA00078 | Turkey_caecum_content  | EUCAMP              | 0,5     | <=1 | <=2 | <=0,06 | >16    | 1     | <i>C. jejuni</i> |
| 2012 | 13-CA00080 | Turkey_caecum_content  | EUCAMP              | 0,25    | >16 | 64  | >4     | >16    | >32   | <i>C. coli</i>   |
| 2012 | 13-CA00082 | Turkey_caecum_content  | EUCAMP              | 0,5     | 2   | 4   | 0,120  | >16    | 1     | <i>C. jejuni</i> |
| 2012 | 13-CA00084 | Turkey_caecum_content  | EUCAMP              | 0,5     | 1   | 64  | >4     | >16    | 1     | <i>C. coli</i>   |
| 2012 | 13-CA00086 | Turkey_caecum_content  | EUCAMP              | 0,5     | 1   | 64  | >4     | >16    | 2     | <i>C. coli</i>   |
| 2012 | 13-CA00088 | Turkey_caecum_content  | EUCAMP              | 0,25    | <=1 | 64  | >4     | >16    | <=0,5 | <i>C. jejuni</i> |
| 2012 | 13-CA00090 | Turkey_caecum_content  | EUCAMP              | 0,5     | 1   | >64 | >4     | >16    | >32   | <i>C. coli</i>   |
| 2012 | 13-CA00092 | Turkey_caecum_content  | EUCAMP              | 0,5     | 2   | >64 | >4     | >16    | 2     | <i>C. coli</i>   |
| 2012 | 13-CA00094 | Turkey_caecum_content  | EUCAMP              | 0,5     | 1   | >64 | >4     | >16    | 2     | <i>C. coli</i>   |
| 2012 | 13-CA00095 | Turkey_caecum_content  | EUCAMP              | 1       | 2   | >64 | >4     | >16    | 2     | <i>C. coli</i>   |
| 2012 | 13-CA00097 | Turkey_caecum_content  | EUCAMP              | 0,25    | 2   | 32  | >4     | >16    | 2     | <i>C. coli</i>   |
| 2012 | 13-CA00098 | Turkey_caecum_content  | EUCAMP              | 0,5     | <=1 | 4   | 0,25   | <=0,25 | 1     | <i>C. jejuni</i> |
| 2012 | 13-CA00100 | Turkey_caecum_content  | EUCAMP              | 0,5     | 1   | 64  | >4     | >16    | 1     | <i>C. coli</i>   |
| 2012 | 13-CA00102 | Turkey_caecum_content  | EUCAMP              | 0,5     | 4   | 64  | >4     | >16    | 1     | <i>C. coli</i>   |
| 2012 | 13-CA00103 | Turkey_caecum_content  | EUCAMP              | 1       | 2   | 4   | 0,120  | 8      | <=0,5 | <i>C. jejuni</i> |
| 2012 | 13-CA00104 | Turkey_caecum_content  | EUCAMP              | <=0,125 | <=1 | 16  | 2      | 8      | <=0,5 | <i>C. jejuni</i> |
| 2012 | 13-CA00107 | Turkey_caecum_content  | EUCAMP              | 0,25    | >16 | 32  | >4     | >16    | >32   | <i>C. coli</i>   |
| 2012 | 13-CA00108 | Turkey_caecum_content  | EUCAMP              | 0,5     | 2   | >64 | >4     | 1      | 2     | <i>C. jejuni</i> |
| 2012 | 13-CA00151 | Turkey_caecum_content  | EUCAMP              | 0,5     | 2   | 64  | >4     | >16    | <=0,5 | <i>C. coli</i>   |
| 2013 | 13-CA00168 | Broiler_caecum_content | EUCAMP              | 0,5     | 2   | >64 | >4     | >16    | 2     | <i>C. coli</i>   |
| 2013 | 13-CA00246 | Broiler_caecum_content | EUCAMP              | 0,5     | 1   | 64  | >4     | <=0,25 | <=0,5 | <i>C. jejuni</i> |
| 2013 | 13-CA00288 | Broiler_caecum_content | EUCAMP              | 1       | 4   | 4   | 0,120  | <=0,25 | <=0,5 | <i>C. jejuni</i> |
| 2013 | 13-CA00289 | Broiler_caecum_content | EUCAMP              | 0,5     | 2   | 64  | >4     | 16     | <=0,5 | <i>C. coli</i>   |
| 2013 | 13-CA00297 | Broiler_caecum_content | EUCAMP              | 0,5     | 2   | 4   | 0,120  | <=0,25 | 1     | <i>C. jejuni</i> |
| 2013 | 13-CA00300 | Broiler_caecum_content | EUCAMP              | 0,25    | 1   | 64  | >4     | <=0,25 | 2     | <i>C. jejuni</i> |
| 2013 | 13-CA00303 | Broiler_caecum_content | EUCAMP              | 0,5     | 2   | 4   | 0,120  | <=0,25 | 2     | <i>C. jejuni</i> |
| 2013 | 13-CA00351 | Broiler_caecum_content | EUCAMP              | 0,25    | 1   | 4   | 0,120  | <=0,25 | <=0,5 | <i>C. jejuni</i> |
| 2013 | 13-CA00454 | Broiler_caecum_content | EUCAMP              | 0,25    | 1   | 32  | >4     | 16     | <=0,5 | <i>C. jejuni</i> |
| 2013 | 13-CA00477 | Broiler_caecum_content | EUCAMP              | 0,5     | 2   | >64 | >4     | >16    | 1     | <i>C. jejuni</i> |
| 2013 | 13-CA00483 | Broiler_caecum_content | EUCAMP              | 0,25    | 1   | 4   | 0,25   | <=0,25 | <=0,5 | <i>C. jejuni</i> |
| 2013 | 13-CA00531 | Broiler_caecum_content | EUCAMP              | 0,5     | 2   | 64  | >4     | >16    | 2     | <i>C. coli</i>   |
| 2013 | 13-CA00532 | Broiler_caecum_content | EUCAMP              | 0,25    | 1   | 32  | >4     | 16     | 4     | <i>C. coli</i>   |

Table S5: Minimum inhibitory concentrations of 6 antimicrobials for isolats of *C. jejuni* and *C. coli* from poultry

| Year | Sample No. | Matrix_final           | Antimicrobial panel | GEN     | STR   | NAL   | CIP    | TET    | ERY   | Species          |
|------|------------|------------------------|---------------------|---------|-------|-------|--------|--------|-------|------------------|
| 2013 | 13-CA00535 | Broiler_caecum_content | EUCAMP              | 1       | 4     | 8     | 0,25   | <=0,25 | 2     | <i>C. jejuni</i> |
| 2013 | 13-CA00537 | Broiler_caecum_content | EUCAMP              | 0,25    | 1     | 32 >4 | >16    | <=0,5  |       | <i>C. jejuni</i> |
| 2013 | 13-CA00574 | Broiler_caecum_content | EUCAMP              | 0,5     | 2     | 4     | 0,120  | <=0,25 | 1     | <i>C. jejuni</i> |
| 2013 | 13-CA00578 | Broiler_caecum_content | EUCAMP              | 0,25    | 1 >64 | >4    | >16    |        | 2     | <i>C. jejuni</i> |
| 2013 | 13-CA00581 | Broiler_caecum_content | EUCAMP              | 0,5     | 2     | >64   | >4     | >16    | 2     | <i>C. coli</i>   |
| 2013 | 13-CA00582 | Broiler_caecum_content | EUCAMP              | 0,5     | 2     | 8     | 0,5    | >16    | 2     | <i>C. coli</i>   |
| 2013 | 13-CA00626 | Broiler_caecum_content | EUCAMP              | 0,5     | 1     | 64    | >4     | >16    | <=0,5 | <i>C. jejuni</i> |
| 2013 | 13-CA00643 | Broiler_caecum_content | EUCAMP              | <=0,125 | 1     | 4     | 0,120  | <=0,25 | <=0,5 | <i>C. jejuni</i> |
| 2013 | 13-CA00718 | Broiler_caecum_content | EUCAMP              | 0,25    | 1     | 64 >4 | >16    |        | 1     | <i>C. coli</i>   |
| 2013 | 13-CA00719 | Broiler_caecum_content | EUCAMP              | 0,25    | 1     | 64 >4 | >16    |        | 2     | <i>C. coli</i>   |
| 2013 | 13-CA00721 | Broiler_caecum_content | EUCAMP              | 0,5     | 1     | 4     | 0,25   | <=0,25 | 1     | <i>C. coli</i>   |
| 2013 | 13-CA00722 | Broiler_caecum_content | EUCAMP              | 0,25    | 1     | 4     | 0,120  | <=0,25 | <=0,5 | <i>C. jejuni</i> |
| 2013 | 13-CA00723 | Broiler_caecum_content | EUCAMP              | 0,5     | 1     | >64   | >4     | <=0,25 | <=0,5 | <i>C. jejuni</i> |
| 2013 | 13-CA00734 | Broiler_caecum_content | EUCAMP              | <=0,125 | 1     | 64 >4 | >16    | <=0,5  |       | <i>C. jejuni</i> |
| 2013 | 13-CA00744 | Broiler_caecum_content | EUCAMP              | 0,5     | 2     | <=2   | 0,120  | <=0,25 | 1     | <i>C. jejuni</i> |
| 2013 | 13-CA00745 | Broiler_caecum_content | EUCAMP              | 0,5     | 2     | 64    | >4     | >16    | <=0,5 | <i>C. coli</i>   |
| 2013 | 13-CA00756 | Broiler_caecum_content | EUCAMP              | <=0,125 | 1     | 8     | <=0,06 | <=0,25 | <=0,5 | <i>C. jejuni</i> |
| 2013 | 13-CA00757 | Broiler_caecum_content | EUCAMP              | 0,5     | 1     | 64    | >4     | <=0,25 | 2     | <i>C. coli</i>   |
| 2013 | 13-CA00759 | Broiler_caecum_content | EUCAMP              | 0,5     | 1     | >64   | >4     | <=0,25 | 1     | <i>C. jejuni</i> |
| 2013 | 13-CA00760 | Broiler_caecum_content | EUCAMP              | 0,25    | 1     | 32 >4 | >16    | <=0,5  |       | <i>C. jejuni</i> |
| 2013 | 13-CA00773 | Broiler_caecum_content | EUCAMP              | 0,5     | 2     | 4     | 0,120  | <=0,25 | 2     | <i>C. jejuni</i> |
| 2013 | 13-CA00775 | Broiler_caecum_content | EUCAMP              | 0,5     | 1     | 4     | 0,120  | <=0,25 | <=0,5 | <i>C. jejuni</i> |
| 2013 | 13-CA00782 | Broiler_caecum_content | EUCAMP              | <=0,125 | 1     | 32 >4 | <=0,25 | <=0,5  |       | <i>C. jejuni</i> |
| 2013 | 13-CA00800 | Broiler_caecum_content | EUCAMP              | 0,5     | 2     | >64   | >4     | <=0,25 | 1     | <i>C. jejuni</i> |
| 2013 | 13-CA00805 | Broiler_caecum_content | EUCAMP              | <=0,125 | 1     | 4     | 0,120  | <=0,25 | <=0,5 | <i>C. jejuni</i> |
| 2013 | 13-CA00807 | Broiler_caecum_content | EUCAMP              | 0,5     | >16   | 64    | >4     | >16    | 2     | <i>C. coli</i>   |
| 2013 | 13-CA00851 | Broiler_caecum_content | EUCAMP              | 0,25    | 1     | 64 >4 | >16    |        | 2     | <i>C. jejuni</i> |
| 2013 | 13-CA00910 | Broiler_caecum_content | EUCAMP              | 0,5     | 1     | >64   | >4     | >16    | <=0,5 | <i>C. jejuni</i> |
| 2013 | 13-CA00912 | Broiler_caecum_content | EUCAMP              | <=0,125 | >16   | 4     | 0,5    | <=0,25 | <=0,5 | <i>C. jejuni</i> |
| 2013 | 13-CA00916 | Broiler_caecum_content | EUCAMP              | 0,25    | 1 <=2 |       | 0,120  | <=0,25 | 1     | <i>C. jejuni</i> |
| 2013 | 13-CA01047 | Broiler_caecum_content | EUCAMP              | 0,5     | 2     | <=2   | >4     | <=0,25 | 1     | <i>C. jejuni</i> |
| 2013 | 13-CA01049 | Broiler_caecum_content | EUCAMP              | 0,5     | 1     | <=2   | >4     | <=0,25 | <=0,5 | <i>C. jejuni</i> |

Table S5: Minimum inhibitory concentrations of 6 antimicrobials for isolats of *C. jejuni* and *C. coli* from poultry

| Year | Sample No. | Matrix_final           | Antimicrobial panel | GEN     | STR    | NAL    | CIP     | TET          | ERY Species     |
|------|------------|------------------------|---------------------|---------|--------|--------|---------|--------------|-----------------|
| 2013 | 13-CA01092 | Broiler_caecum_content | EUCAMP              | 0,5     | 2      | 64     | >4      | <=0,25       | <=0,5 C. coli   |
| 2013 | 13-CA01188 | Broiler_caecum_content | EUCAMP              | <=0,125 | 1      | 32 >4  |         | 16           | 1 C. jejuni     |
| 2013 | 13-CA01284 | Broiler_caecum_content | EUCAMP              | 0,5     | 2      | <=2    | 0,120   | >16          | 1 C. jejuni     |
| 2013 | 13-CA01285 | Broiler_caecum_content | EUCAMP              | 0,5     | 2      | 64     | >4      | <=0,25       | 2 C. coli       |
| 2013 | 13-CA01286 | Broiler_caecum_content | EUCAMP              | 0,5     | 2      | <=2    | 0,120   | >16          | 1 C. jejuni     |
| 2013 | 13-CA01287 | Broiler_caecum_content | EUCAMP              | 0,5     | 2      | 64     | >4      | >16          | 2 C. coli       |
| 2013 | 13-CA01288 | Broiler_caecum_content | EUCAMP              | 0,5     | 2      | 4      | 0,120   | <=0,25       | <=0,5 C. jejuni |
| 2013 | 13-CA01290 | Broiler_caecum_content | EUCAMP              | 0,5     | 2      | 4      | 0,120   | <=0,25       | 1 C. jejuni     |
| 2013 | 13-CA01294 | Broiler_caecum_content | EUCAMP              | 0,5     | 2      | 8      | 0,5     | <=0,25       | <=0,5 C. coli   |
| 2013 | 13-CA01295 | Broiler_caecum_content | EUCAMP              | 0,5     | 1      | 4      | 0,120   | >16          | <=0,5 C. jejuni |
| 2013 | 14-CA00200 | Broiler_caecum_content | EUCAMP              | 0,25    | 1      | 32 >4  |         | <=0,25 <=0,5 | C. jejuni       |
| 2014 | 14-CA00105 | Broiler_caecum_content | EUCAMP2             | 0,5     | 2      | 8      | 0,25    | <=0,5        | 2 C. coli       |
| 2014 | 14-CA00152 | Broiler_caecum_content | EUCAMP2             | <=0,125 | <=0,25 | 16     | 8       | <=0,5 <=1    | C. jejuni       |
| 2014 | 14-CA00154 | Broiler_caecum_content | EUCAMP2             | 0,5     | 1      | 4      | 0,25    | <=0,5        | 2 C. coli       |
| 2014 | 14-CA00238 | Broiler_caecum_content | EUCAMP2             | 0,5     | 2      | 8      | 0,25    | >64          | <=1 C. coli     |
| 2014 | 14-CA00245 | Broiler_caecum_content | EUCAMP2             | 0,5     | 1      | 32     | 16      | 64           | <=1 C. jejuni   |
| 2014 | 14-CA00246 | Broiler_caecum_content | EUCAMP2             | 0,5     | 1      | 64     | 8       | <=0,5        | <=1 C. coli     |
| 2014 | 14-CA00247 | Turkey_caecum_content  | EUCAMP2             | 0,25    | 2      | 64     | 8       | <=0,5 <=1    | C. coli         |
| 2014 | 14-CA00248 | Turkey_caecum_content  | EUCAMP2             | 0,25    | 2      | 64 >16 | >64     |              | 2 C. coli       |
| 2014 | 14-CA00248 | Turkey_caecum_content  | EUCAMP2             | 0,25    | 0,5    | 8      | 0,5     | >64 <=1      | C. jejuni       |
| 2014 | 14-CA00249 | Turkey_caecum_content  | EUCAMP2             | 0,5     | 2      | 4      | 0,25    | <=0,5        | <=1 C. coli     |
| 2014 | 14-CA00250 | Broiler_caecum_content | EUCAMP2             | 0,5     | 2      | 64     | 8       | <=0,5        | <=1 C. coli     |
| 2014 | 14-CA00259 | Turkey_caecum_content  | EUCAMP2             | <=0,125 | <=0,25 | 64     | 16      | 64           | 2 C. jejuni     |
| 2014 | 14-CA00271 | Turkey_caecum_content  | EUCAMP2             | 0,5     | 1      | 64     | 16      | <=0,5        | <=1 C. jejuni   |
| 2014 | 14-CA00272 | Turkey_caecum_content  | EUCAMP2             | 0,5     | 1      | 8      | 1       | 32           | <=1 C. jejuni   |
| 2014 | 14-CA00273 | Turkey_caecum_content  | EUCAMP2             | 0,5     | 1      | 8      | 0,5     | <=0,5        | <=1 C. jejuni   |
| 2014 | 14-CA00283 | Broiler_caecum_content | EUCAMP2             | <=0,125 | <=0,25 | 4      | <=0,125 | <=0,5 <=1    | C. jejuni       |
| 2014 | 14-CA00284 | Turkey_caecum_content  | EUCAMP2             | 0,25    | >16    | 16     | 8       | 32 <=1       | C. coli         |
| 2014 | 14-CA00285 | Turkey_caecum_content  | EUCAMP2             | 0,25    | 0,5    | 64 >16 | <=0,5   | <=1          | C. jejuni       |
| 2014 | 14-CA00286 | Turkey_caecum_content  | EUCAMP2             | 0,5     | 2      | 64     | >16     | >64          | 2 C. coli       |
| 2014 | 14-CA00287 | Broiler_caecum_content | EUCAMP2             | 0,5     | 0,5    | 2      | <=0,125 | <=0,5        | <=1 C. jejuni   |
| 2014 | 14-CA00297 | Turkey_caecum_content  | EUCAMP2             | 0,5     | 2      | 64     | >16     | >64          | <=1 C. coli     |

Table S5: Minimum inhibitory concentrations of 6 antimicrobials for isolats of *C. jejuni* and *C. coli* from poultry

| Year | Sample No. | Matrix_final           | Antimicrobial panel | GEN     | STR    | NAL | CIP     | TET   | ERY  | Species          |
|------|------------|------------------------|---------------------|---------|--------|-----|---------|-------|------|------------------|
| 2014 | 14-CA00302 | Turkey_caecum_content  | EUCAMP2             | 0,5     | 1      | 2   | <=0,125 | <=0,5 | <=1  | <i>C. jejuni</i> |
| 2014 | 14-CA00303 | Turkey_caecum_content  | EUCAMP2             | 0,25    | 0,5    | 8   | 0,5     | 64    | <=1  | <i>C. jejuni</i> |
| 2014 | 14-CA00304 | Turkey_caecum_content  | EUCAMP2             | <=0,125 | <=0,25 | 32  | 16      | 64    | <=1  | <i>C. jejuni</i> |
| 2014 | 14-CA00305 | Turkey_caecum_content  | EUCAMP2             | 0,5     | 1      | 64  | 16      | 64    | <=1  | <i>C. coli</i>   |
| 2014 | 14-CA00325 | Broiler_caecum_content | EUCAMP2             | 1       | 2      | >64 | 16      | <=0,5 | <=1  | <i>C. jejuni</i> |
| 2014 | 14-CA00326 | Broiler_caecum_content | EUCAMP2             | <=0,125 | <=0,25 | 4   | <=0,125 | <=0,5 | <=1  | <i>C. jejuni</i> |
| 2014 | 14-CA00333 | Broiler_caecum_content | EUCAMP2             | 0,5     | 2      | 64  | 16      | <=0,5 | <=1  | <i>C. coli</i>   |
| 2014 | 14-CA00334 | Broiler_caecum_content | EUCAMP2             | 0,5     | 1      | 64  | 16      | 64    | <=1  | <i>C. jejuni</i> |
| 2014 | 14-CA00335 | Broiler_caecum_content | EUCAMP2             | 1       | 4      | 64  | 16      | 64    | <=1  | <i>C. coli</i>   |
| 2014 | 14-CA00336 | Broiler_caecum_content | EUCAMP2             | <=0,125 | <=0,25 | 16  | 8       | <=0,5 | <=1  | <i>C. jejuni</i> |
| 2014 | 14-CA00337 | Broiler_caecum_content | EUCAMP2             | 0,25    | <=0,25 | 16  | 8       | <=0,5 | <=1  | <i>C. jejuni</i> |
| 2014 | 14-CA00338 | Broiler_caecum_content | EUCAMP2             | 0,5     | 1      | 64  | >16     | 32    | <=1  | <i>C. coli</i>   |
| 2014 | 14-CA00344 | Broiler_caecum_content | EUCAMP2             | 0,5     | 2      | >64 | 16      | 32    | <=1  | <i>C. coli</i>   |
| 2014 | 14-CA00352 | Turkey_caecum_content  | EUCAMP2             | 1       | 1      | 64  | >16     | >64   | >128 | <i>C. coli</i>   |
| 2014 | 14-CA00353 | Turkey_caecum_content  | EUCAMP2             | <=0,125 | <=0,25 | 32  | 16      | 64    | <=1  | <i>C. jejuni</i> |
| 2014 | 14-CA00354 | Turkey_caecum_content  | EUCAMP2             | 0,25    | 1      | 4   | <=0,125 | <=0,5 | <=1  | <i>C. jejuni</i> |
| 2014 | 14-CA00355 | Turkey_caecum_content  | EUCAMP2             | 0,25    | 0,5    | 32  | >16     | >64   | <=1  | <i>C. jejuni</i> |
| 2014 | 14-CA00356 | Turkey_caecum_content  | EUCAMP2             | 0,25    | 1      | >64 | >16     | >64   | 2    | <i>C. jejuni</i> |
| 2014 | 14-CA00357 | Turkey_caecum_content  | EUCAMP2             | 0,5     | >16    | >64 | >16     | >64   | >128 | <i>C. coli</i>   |
| 2014 | 14-CA00358 | Broiler_caecum_content | EUCAMP2             | 0,5     | 1      | 4   | 0,25    | <=0,5 | <=1  | <i>C. coli</i>   |
| 2014 | 14-CA00359 | Broiler_caecum_content | EUCAMP2             | 0,5     | 1      | 64  | 8       | 64    | <=1  | <i>C. jejuni</i> |
| 2014 | 14-CA00360 | Turkey_caecum_content  | EUCAMP2             | 0,5     | 2      | 64  | >16     | >64   | 2    | <i>C. coli</i>   |
| 2014 | 14-CA00361 | Turkey_caecum_content  | EUCAMP2             | 0,5     | 0,5    | 4   | 0,25    | <=0,5 | <=1  | <i>C. coli</i>   |
| 2014 | 14-CA00362 | Turkey_caecum_content  | EUCAMP2             | 0,5     | 1      | >64 | 16      | >64   | <=1  | <i>C. jejuni</i> |
| 2014 | 14-CA00363 | Broiler_caecum_content | EUCAMP2             | 0,5     | 2      | >64 | >16     | 64    | <=1  | <i>C. jejuni</i> |
| 2014 | 14-CA00364 | Broiler_caecum_content | EUCAMP2             | 0,5     | 1      | 64  | >16     | 64    | >128 | <i>C. coli</i>   |
| 2014 | 14-CA00365 | Broiler_caecum_content | EUCAMP2             | 0,25    | 0,5    | 64  | 16      | 32    | <=1  | <i>C. jejuni</i> |
| 2014 | 14-CA00366 | Turkey_caecum_content  | EUCAMP2             | 0,5     | 2      | 64  | 16      | <=0,5 | <=1  | <i>C. coli</i>   |
| 2014 | 14-CA00367 | Turkey_caecum_content  | EUCAMP2             | 0,5     | 2      | 64  | 8       | 32    | <=1  | <i>C. coli</i>   |
| 2014 | 14-CA00368 | Turkey_caecum_content  | EUCAMP2             | 0,5     | 2      | 64  | >16     | 64    | >128 | <i>C. coli</i>   |
| 2014 | 14-CA00369 | Turkey_caecum_content  | EUCAMP2             | 0,5     | 1      | 64  | 16      | >64   | <=1  | <i>C. coli</i>   |
| 2014 | 14-CA00370 | Turkey_caecum_content  | EUCAMP2             | 0,5     | 1      | >64 | >16     | >64   | >128 | <i>C. coli</i>   |

Table S5: Minimum inhibitory concentrations of 6 antimicrobials for isolats of *C. jejuni* and *C. coli* from poultry

| Year | Sample No. | Matrix_final           | Antimicrobial panel | GEN     | STR    | NAL | CIP     | TET   | ERY Species           |
|------|------------|------------------------|---------------------|---------|--------|-----|---------|-------|-----------------------|
| 2014 | 14-CA00371 | Turkey_caecum_content  | EUCAMP2             | 0,5     | 1      | 64  | 16      | 64    | <=1 <i>C. jejuni</i>  |
| 2014 | 14-CA00372 | Turkey_caecum_content  | EUCAMP2             | 0,5     | 2      | 64  | >16     | 64    | >128 <i>C. coli</i>   |
| 2014 | 14-CA00373 | Turkey_caecum_content  | EUCAMP2             | 0,5     | 2      | 64  | >16     | >64   | >128 <i>C. coli</i>   |
| 2014 | 14-CA00374 | Turkey_caecum_content  | EUCAMP2             | 0,5     | 2      | 8   | 0,5     | <=0,5 | 2 <i>C. jejuni</i>    |
| 2014 | 14-CA00375 | Turkey_caecum_content  | EUCAMP2             | 0,25    | 1      | 4   | <=0,125 | <=0,5 | <=1 <i>C. jejuni</i>  |
| 2014 | 14-CA00376 | Turkey_caecum_content  | EUCAMP2             | 0,5     | 2      | >64 | >16     | 64    | 2 <i>C. coli</i>      |
| 2014 | 14-CA00377 | Turkey_caecum_content  | EUCAMP2             | 0,25    | >16    | 32  | 16      | 32    | <=1 <i>C. coli</i>    |
| 2014 | 14-CA00378 | Turkey_caecum_content  | EUCAMP2             | <=0,125 | 0,5    | 4   | <=0,125 | <=0,5 | <=1 <i>C. coli</i>    |
| 2014 | 14-CA00379 | Turkey_caecum_content  | EUCAMP2             | 0,5     | 2      | 64  | 16      | <=0,5 | <=1 <i>C. jejuni</i>  |
| 2014 | 14-CA00380 | Turkey_caecum_content  | EUCAMP2             | 0,5     | 2      | >64 | >16     | >64   | >128 <i>C. coli</i>   |
| 2014 | 14-CA00381 | Broiler_caecum_content | EUCAMP2             | 0,5     | 1      | >64 | >16     | >64   | >128 <i>C. jejuni</i> |
| 2014 | 14-CA00382 | Turkey_caecum_content  | EUCAMP2             | <=0,125 | <=0,25 | 64  | 16      | 16    | <=1 <i>C. jejuni</i>  |
| 2014 | 14-CA00383 | Turkey_caecum_content  | EUCAMP2             | 1       | 2      | >64 | 16      | <=0,5 | <=1 <i>C. jejuni</i>  |
| 2014 | 14-CA00384 | Turkey_caecum_content  | EUCAMP2             | 0,5     | 1      | 4   | <=0,125 | <=0,5 | <=1 <i>C. jejuni</i>  |
| 2014 | 14-CA00385 | Turkey_caecum_content  | EUCAMP2             | 0,5     | 2      | 4   | <=0,125 | >64   | <=1 <i>C. jejuni</i>  |
| 2014 | 14-CA00386 | Turkey_caecum_content  | EUCAMP2             | 0,5     | 1      | 8   | 1       | >64   | 2 <i>C. jejuni</i>    |
| 2014 | 14-CA00387 | Turkey_caecum_content  | EUCAMP2             | 0,5     | 2      | 4   | 0,25    | <=0,5 | <=1 <i>C. jejuni</i>  |
| 2014 | 14-CA00388 | Turkey_caecum_content  | EUCAMP2             | 1       | 2      | 8   | 0,25    | 64    | <=1 <i>C. coli</i>    |
| 2014 | 14-CA00389 | Turkey_caecum_content  | EUCAMP2             | 0,5     | 1      | >64 | >16     | >64   | 2 <i>C. jejuni</i>    |
| 2014 | 14-CA00390 | Turkey_caecum_content  | EUCAMP2             | 1       | 1      | 4   | <=0,125 | 64    | <=1 <i>C. jejuni</i>  |
| 2014 | 14-CA00391 | Turkey_caecum_content  | EUCAMP2             | 0,5     | 1      | 64  | >16     | >64   | 2 <i>C. jejuni</i>    |
| 2014 | 14-CA00392 | Turkey_caecum_content  | EUCAMP2             | 0,25    | 2      | 64  | >16     | >64   | <=1 <i>C. coli</i>    |
| 2014 | 14-CA00392 | Turkey_caecum_content  | EUCAMP2             | 0,25    | 0,5    | 32  | 16      | 64    | <=1 <i>C. jejuni</i>  |
| 2014 | 14-CA00393 | Turkey_caecum_content  | EUCAMP2             | 1       | 2      | >64 | 16      | <=0,5 | <=1 <i>C. jejuni</i>  |
| 2014 | 14-CA00394 | Turkey_caecum_content  | EUCAMP2             | <=0,125 | 0,5    | 16  | 4       | 8     | <=1 <i>C. jejuni</i>  |
| 2014 | 14-CA00395 | Turkey_caecum_content  | EUCAMP2             | 0,5     | 2      | 64  | >16     | 64    | >128 <i>C. coli</i>   |
| 2014 | 14-CA00396 | Turkey_caecum_content  | EUCAMP2             | 0,5     | >16    | >64 | >16     | >64   | >128 <i>C. coli</i>   |
| 2014 | 14-CA00397 | Turkey_caecum_content  | EUCAMP2             | 0,25    | 1      | 4   | <=0,125 | <=0,5 | <=1 <i>C. jejuni</i>  |
| 2014 | 14-CA00398 | Turkey_caecum_content  | EUCAMP2             | 0,5     | 2      | 64  | 16      | 64    | <=1 <i>C. coli</i>    |
| 2014 | 14-CA00399 | Turkey_caecum_content  | EUCAMP2             | <=0,125 | 0,5    | 64  | >16     | >64   | <=1 <i>C. jejuni</i>  |
| 2014 | 14-CA00400 | Turkey_caecum_content  | EUCAMP2             | 0,5     | 2      | >64 | >16     | 64    | >128 <i>C. coli</i>   |
| 2014 | 14-CA00401 | Turkey_caecum_content  | EUCAMP2             | 0,5     | 2      | 64  | 16      | >64   | <=1 <i>C. coli</i>    |



Table S5: Minimum inhibitory concentrations of 6 antimicrobials for isolats of *C. jejuni* and *C. coli* from poultry

| Year | Sample No. | Matrix_final           | Antimicrobial panel | GEN    | STR   | NAL | CIP       | TET   | ERY Species           |
|------|------------|------------------------|---------------------|--------|-------|-----|-----------|-------|-----------------------|
| 2014 | 14-CA00402 | Turkey_caecum_content  | EUCAMP2             | 0,5    | 2     | 64  | >16       | >64   | 2 <i>C. coli</i>      |
| 2014 | 14-CA00403 | Turkey_caecum_content  | EUCAMP2             | 0,25   | 1     | 64  | 16        | 16 ≤1 | <i>C. jejuni</i>      |
| 2014 | 14-CA00404 | Broiler_caecum_content | EUCAMP2             | 0,25   | 0,5   | 4   | 0,25 ≤0,5 | ≤1    | <i>C. jejuni</i>      |
| 2014 | 14-CA00405 | Turkey_caecum_content  | EUCAMP2             | 0,5    | 2     | 64  | >16       | 64    | >128 <i>C. coli</i>   |
| 2014 | 14-CA00406 | Turkey_caecum_content  | EUCAMP2             | 0,5    | 1     | 64  | >16       | 32    | ≤1 <i>C. jejuni</i>   |
| 2014 | 14-CA00407 | Turkey_caecum_content  | EUCAMP2             | 0,25   | 0,5   | 64  | >16       | ≤0,5  | ≤1 <i>C. jejuni</i>   |
| 2014 | 14-CA00408 | Turkey_caecum_content  | EUCAMP2             | 0,5    | 1     | 64  | 8         | 64    | 128 <i>C. coli</i>    |
| 2014 | 14-CA00409 | Turkey_caecum_content  | EUCAMP2             | 1      | 4     | >64 | >16       | >64   | ≤1 <i>C. coli</i>     |
| 2014 | 14-CA00410 | Turkey_caecum_content  | EUCAMP2             | 0,5    | 1     | 4   | ≤0,125    | ≤0,5  | ≤1 <i>C. jejuni</i>   |
| 2014 | 14-CA00411 | Turkey_caecum_content  | EUCAMP2             | 0,5    | >16   | 4   | >16       | >64   | ≤1 <i>C. jejuni</i>   |
| 2014 | 14-CA00412 | Turkey_caecum_content  | EUCAMP2             | 2      | >16   | 16  | 0,25      | 64    | 2 <i>C. coli</i>      |
| 2014 | 14-CA00413 | Turkey_caecum_content  | EUCAMP2             | 0,5    | 1     | 8   | 0,5       | 16    | ≤1 <i>C. jejuni</i>   |
| 2014 | 14-CA00416 | Broiler_caecum_content | EUCAMP2             | 0,5    | 1     | >64 | >16       | >64   | 2 <i>C. jejuni</i>    |
| 2014 | 14-CA00418 | Broiler_caecum_content | EUCAMP2             | 0,25   | 0,5   | 16  | 8         | 32    | ≤1 <i>C. jejuni</i>   |
| 2014 | 14-CA00427 | Broiler_caecum_content | EUCAMP2             | 0,5    | 1     | 64  | 16        | 64    | ≤1 <i>C. coli</i>     |
| 2014 | 14-CA00429 | Turkey_caecum_content  | EUCAMP2             | 0,5    | >16   | >64 | >16       | 64    | ≤1 <i>C. coli</i>     |
| 2014 | 14-CA00430 | Broiler_caecum_content | EUCAMP2             | 0,25   | 0,5   | 64  | >16       | >64   | >128 <i>C. jejuni</i> |
| 2014 | 14-CA00431 | Broiler_caecum_content | EUCAMP2             | 0,25   | 0,5   | 64  | >16       | >64   | >128 <i>C. jejuni</i> |
| 2014 | 14-CA00432 | Turkey_caecum_content  | EUCAMP2             | 0,5    | 0,5   | 64  | 16        | ≤0,5  | ≤1 <i>C. jejuni</i>   |
| 2014 | 14-CA00438 | Broiler_caecum_content | EUCAMP2             | 0,25   | 1     | 32  | 16        | ≤0,5  | ≤1 <i>C. jejuni</i>   |
| 2014 | 14-CA00439 | Broiler_caecum_content | EUCAMP2             | 0,5    | 1     | >64 | 16        | 32    | ≤1 <i>C. coli</i>     |
| 2014 | 14-CA00440 | Turkey_caecum_content  | EUCAMP2             | 0,5    | 1     | >64 | >16       | >64   | ≤1 <i>C. jejuni</i>   |
| 2014 | 14-CA00441 | Turkey_caecum_content  | EUCAMP2             | ≤0,125 | ≤0,25 | 32  | 4         | 16    | ≤1 <i>C. jejuni</i>   |
| 2014 | 14-CA00442 | Turkey_caecum_content  | EUCAMP2             | 0,5    | 0,5   | 32  | 8         | 32    | ≤1 <i>C. jejuni</i>   |
| 2014 | 14-CA00444 | Broiler_caecum_content | EUCAMP2             | 0,25   | 0,5   | 16  | 4         | ≤0,5  | ≤1 <i>C. jejuni</i>   |
| 2014 | 14-CA00452 | Turkey_caecum_content  | EUCAMP2             | 0,5    | 1     | >64 | >16       | >64   | ≤1 <i>C. jejuni</i>   |
| 2014 | 14-CA00453 | Broiler_caecum_content | EUCAMP2             | 0,25   | 0,5   | 32  | 8         | ≤0,5  | ≤1 <i>C. jejuni</i>   |
| 2014 | 14-CA00456 | Turkey_caecum_content  | EUCAMP2             | 0,25   | 1     | 64  | >16       | >64   | ≤1 <i>C. jejuni</i>   |
| 2014 | 14-CA00457 | Turkey_caecum_content  | EUCAMP2             | 0,5    | 1     | >64 | >16       | >64   | ≤1 <i>C. coli</i>     |
| 2014 | 14-CA00458 | Turkey_caecum_content  | EUCAMP2             | ≤0,125 | 0,5   | 32  | 16        | 64    | ≤1 <i>C. jejuni</i>   |
| 2014 | 14-CA00459 | Turkey_caecum_content  | EUCAMP2             | 0,5    | 2     | 64  | >16       | 64    | >128 <i>C. coli</i>   |
| 2014 | 14-CA00460 | Turkey_caecum_content  | EUCAMP2             | 0,25   | 0,5   | 4   | ≤0,125    | ≤0,5  | ≤1 <i>C. jejuni</i>   |

Table S5: Minimum inhibitory concentrations of 6 antimicrobials for isolats of *C. jejuni* and *C. coli* from poultry

| Year | Sample No. | Matrix_final           | Antimicrobial panel | GEN  | STR    | NAL | CIP     | TET   | ERY  | Species          |
|------|------------|------------------------|---------------------|------|--------|-----|---------|-------|------|------------------|
| 2014 | 14-CA00461 | Turkey_caecum_content  | EUCAMP2             | 0,25 | 0,5    | 32  | 16      | 64    | <=1  | <i>C. jejuni</i> |
| 2014 | 14-CA00462 | Turkey_caecum_content  | EUCAMP2             | 0,5  | 2      | 64  | 16      | 4     | <=1  | <i>C. jejuni</i> |
| 2014 | 14-CA00463 | Turkey_caecum_content  | EUCAMP2             | 0,5  | 2      | >64 | >16     | >64   | >128 | <i>C. coli</i>   |
| 2014 | 14-CA00464 | Turkey_caecum_content  | EUCAMP2             | 0,5  | 2      | 8   | 0,5     | >64   | <=1  | <i>C. coli</i>   |
| 2014 | 14-CA00465 | Turkey_caecum_content  | EUCAMP2             | 0,5  | >16    | 64  | 16      | 64    | <=1  | <i>C. coli</i>   |
| 2014 | 14-CA00466 | Turkey_caecum_content  | EUCAMP2             | 0,5  | 2      | >64 | >16     | <=0,5 | 4    | <i>C. coli</i>   |
| 2014 | 14-CA00467 | Turkey_caecum_content  | EUCAMP2             | 0,5  | 2      | 64  | >16     | >64   | >128 | <i>C. coli</i>   |
| 2014 | 14-CA00468 | Turkey_caecum_content  | EUCAMP2             | 0,5  | 1      | 64  | 16      | >64   | >128 | <i>C. coli</i>   |
| 2014 | 14-CA00469 | Broiler_caecum_content | EUCAMP2             | 0,5  | 2      | >64 | >16     | 1     | <=1  | <i>C. jejuni</i> |
| 2014 | 14-CA00470 | Turkey_caecum_content  | EUCAMP2             | 1    | 4      | >64 | >16     | >64   | 2    | <i>C. coli</i>   |
| 2014 | 14-CA00471 | Turkey_caecum_content  | EUCAMP2             | 1    | 1      | 4   | 0,25    | <=0,5 | <=1  | <i>C. jejuni</i> |
| 2014 | 14-CA00472 | Turkey_caecum_content  | EUCAMP2             | 0,5  | 2      | 64  | >16     | 64    | >128 | <i>C. coli</i>   |
| 2014 | 14-CA00473 | Turkey_caecum_content  | EUCAMP2             | 0,25 | 0,5    | 32  | 8       | 32    | <=1  | <i>C. jejuni</i> |
| 2014 | 14-CA00474 | Turkey_caecum_content  | EUCAMP2             | 0,5  | 2      | 32  | 8       | 64    | 64   | <i>C. coli</i>   |
| 2014 | 14-CA00475 | Turkey_caecum_content  | EUCAMP2             | 0,25 | 0,5    | 8   | 0,5     | >64   | <=1  | <i>C. jejuni</i> |
| 2014 | 14-CA00476 | Turkey_caecum_content  | EUCAMP2             | 1    | >16    | >64 | >16     | 64    | 2    | <i>C. coli</i>   |
| 2014 | 14-CA00477 | Turkey_caecum_content  | EUCAMP2             | 0,25 | 0,5    | 64  | >16     | >64   | <=1  | <i>C. jejuni</i> |
| 2014 | 14-CA00478 | Turkey_caecum_content  | EUCAMP2             | 0,5  | 1      | 64  | 16      | 64    | <=1  | <i>C. jejuni</i> |
| 2014 | 14-CA00479 | Turkey_caecum_content  | EUCAMP2             | 0,25 | 1      | 64  | >16     | <=0,5 | 2    | <i>C. jejuni</i> |
| 2014 | 14-CA00480 | Turkey_caecum_content  | EUCAMP2             | 0,25 | 1      | 16  | 16      | 32    | <=1  | <i>C. jejuni</i> |
| 2014 | 14-CA00481 | Broiler_caecum_content | EUCAMP2             | 0,5  | 1      | 4   | 0,25    | <=0,5 | <=1  | <i>C. jejuni</i> |
| 2014 | 14-CA00482 | Broiler_caecum_content | EUCAMP2             | 0,25 | 0,5    | 4   | <=0,125 | <=0,5 | <=1  | <i>C. jejuni</i> |
| 2014 | 14-CA00483 | Turkey_caecum_content  | EUCAMP2             | 0,5  | >16    | 4   | <=0,125 | 64    | >128 | <i>C. coli</i>   |
| 2014 | 14-CA00484 | Turkey_caecum_content  | EUCAMP2             | 0,25 | >16    | 32  | 16      | 64    | <=1  | <i>C. jejuni</i> |
| 2014 | 14-CA00485 | Turkey_caecum_content  | EUCAMP2             | 0,5  | 1      | 64  | >16     | >64   | <=1  | <i>C. jejuni</i> |
| 2014 | 14-CA00486 | Turkey_caecum_content  | EUCAMP2             | 0,5  | 2      | 64  | >16     | 64    | 2    | <i>C. coli</i>   |
| 2014 | 14-CA00487 | Turkey_caecum_content  | EUCAMP2             | 1    | 4      | >64 | 16      | 64    | <=1  | <i>C. coli</i>   |
| 2014 | 14-CA00488 | Turkey_caecum_content  | EUCAMP2             | 0,25 | <=0,25 | 64  | 16      | <=0,5 | <=1  | <i>C. jejuni</i> |
| 2014 | 14-CA00489 | Turkey_caecum_content  | EUCAMP2             | 0,25 | 2      | 64  | 16      | 64    | >128 | <i>C. coli</i>   |
| 2014 | 14-CA00490 | Turkey_caecum_content  | EUCAMP2             | 0,5  | 2      | 64  | >16     | 64    | >128 | <i>C. coli</i>   |
| 2014 | 14-CA00491 | Turkey_caecum_content  | EUCAMP2             | 0,5  | 1      | 64  | >16     | 32    | 2    | <i>C. jejuni</i> |
| 2014 | 14-CA00492 | Turkey_caecum_content  | EUCAMP2             | 0,5  | 1      | 64  | 16      | <=0,5 | <=1  | <i>C. jejuni</i> |

Table S5: Minimum inhibitory concentrations of 6 antimicrobials for isolats of *C. jejuni* and *C. coli* from poultry

| Year | Sample No. | Matrix_final           | Antimicrobial panel | GEN     | STR    | NAL | CIP     | TET   | ERY  | Species          |
|------|------------|------------------------|---------------------|---------|--------|-----|---------|-------|------|------------------|
| 2014 | 14-CA00493 | Broiler_caecum_content | EUCAMP2             | 0,5     | 1      | 4   | <=0,125 | <=0,5 | <=1  | <i>C. jejuni</i> |
| 2014 | 14-CA00516 | Broiler_caecum_content | EUCAMP2             | 0,25    | 0,5    | 64  | 16      | <=0,5 | <=1  | <i>C. jejuni</i> |
| 2014 | 14-CA00517 | Broiler_caecum_content | EUCAMP2             | 1       | 2      | 4   | <=0,125 | 64    | <=1  | <i>C. coli</i>   |
| 2014 | 14-CA00518 | Broiler_caecum_content | EUCAMP2             | <=0,125 | 0,5    | 16  | 8       | 32    | <=1  | <i>C. jejuni</i> |
| 2014 | 14-CA00519 | Broiler_caecum_content | EUCAMP2             | 0,25    | 1      | 4   | <=0,125 | <=0,5 | <=1  | <i>C. jejuni</i> |
| 2014 | 14-CA00520 | Broiler_caecum_content | EUCAMP2             | 0,25    | 1      | 16  | 16      | <=0,5 | <=1  | <i>C. jejuni</i> |
| 2014 | 14-CA00521 | Broiler_caecum_content | EUCAMP2             | 0,5     | 0,5    | >64 | >16     | 1     | <=1  | <i>C. jejuni</i> |
| 2014 | 14-CA00522 | Broiler_caecum_content | EUCAMP2             | 1       | 2      | 4   | <=0,125 | 64    | <=1  | <i>C. coli</i>   |
| 2014 | 14-CA00523 | Turkey_caecum_content  | EUCAMP2             | 0,5     | 2      | >64 | 16      | <=0,5 | <=1  | <i>C. jejuni</i> |
| 2014 | 14-CA00524 | Broiler_caecum_content | EUCAMP2             | 0,5     | 2      | 64  | 16      | <=0,5 | <=1  | <i>C. jejuni</i> |
| 2014 | 14-CA00557 | Broiler_caecum_content | EUCAMP2             | 0,5     | 1      | 32  | 16      | <=0,5 | <=1  | <i>C. jejuni</i> |
| 2014 | 14-CA00567 | Broiler_caecum_content | EUCAMP2             | 0,25    | 1      | 4   | 0,25    | <=0,5 | <=1  | <i>C. jejuni</i> |
| 2014 | 14-CA00568 | Broiler_caecum_content | EUCAMP2             | 0,25    | 1      | 16  | 4       | 32    | 64   | <i>C. coli</i>   |
| 2014 | 14-CA00569 | Broiler_caecum_content | EUCAMP2             | <=0,125 | <=0,25 | 4   | 0,5     | 64    | <=1  | <i>C. jejuni</i> |
| 2014 | 14-CA00574 | Turkey_caecum_content  | EUCAMP2             | 0,5     | 1      | 32  | >16     | >64   | >128 | <i>C. coli</i>   |
| 2014 | 14-CA00575 | Turkey_caecum_content  | EUCAMP2             | 0,5     | 2      | >64 | >16     | >64   | <=1  | <i>C. coli</i>   |
| 2014 | 14-CA00577 | Turkey_caecum_content  | EUCAMP2             | 0,5     | 1      | 64  | >16     | >64   | <=1  | <i>C. jejuni</i> |
| 2014 | 14-CA00580 | Turkey_caecum_content  | EUCAMP2             | 0,5     | >16    | 4   | 0,25    | <=0,5 | 4    | <i>C. coli</i>   |
| 2014 | 14-CA00581 | Turkey_caecum_content  | EUCAMP2             | <=0,125 | 2      | >64 | >16     | >64   | 2    | <i>C. coli</i>   |
| 2014 | 14-CA00584 | Turkey_caecum_content  | EUCAMP2             | 0,5     | 2      | 64  | >16     | 64    | <=1  | <i>C. coli</i>   |
| 2014 | 14-CA00585 | Turkey_caecum_content  | EUCAMP2             | 0,25    | 1      | 4   | 0,25    | 64    | <=1  | <i>C. coli</i>   |
| 2014 | 14-CA00586 | Turkey_caecum_content  | EUCAMP2             | 0,5     | 1      | >64 | >16     | >64   | <=1  | <i>C. coli</i>   |
| 2014 | 14-CA00587 | Turkey_caecum_content  | EUCAMP2             | 0,5     | 1      | 4   | <=0,125 | <=0,5 | <=1  | <i>C. jejuni</i> |
| 2014 | 14-CA00588 | Turkey_caecum_content  | EUCAMP2             | 0,5     | 1      | >64 | >16     | >64   | <=1  | <i>C. coli</i>   |
| 2014 | 14-CA00590 | Turkey_caecum_content  | EUCAMP2             | 1       | 2      | >64 | 16      | >64   | <=1  | <i>C. jejuni</i> |
| 2014 | 14-CA00592 | Turkey_caecum_content  | EUCAMP2             | 0,5     | 2      | 64  | 16      | >64   | <=1  | <i>C. coli</i>   |
| 2014 | 14-CA00593 | Turkey_caecum_content  | EUCAMP2             | 1       | 2      | 8   | 0,25    | <=0,5 | <=1  | <i>C. jejuni</i> |
| 2014 | 14-CA00594 | Turkey_caecum_content  | EUCAMP2             | 0,5     | 2      | 4   | <=0,125 | <=0,5 | <=1  | <i>C. jejuni</i> |
| 2014 | 14-CA00595 | Turkey_caecum_content  | EUCAMP2             | 0,5     | 2      | 64  | >16     | 64    | >128 | <i>C. coli</i>   |
| 2014 | 14-CA00596 | Turkey_caecum_content  | EUCAMP2             | 1       | 2      | 8   | 0,25    | 64    | <=1  | <i>C. coli</i>   |
| 2014 | 14-CA00598 | Turkey_caecum_content  | EUCAMP2             | 0,5     | 2      | >64 | >16     | >64   | 2    | <i>C. coli</i>   |
| 2014 | 14-CA00607 | Turkey_caecum_content  | EUCAMP2             | 0,5     | 2      | >64 | >16     | >64   | 2    | <i>C. jejuni</i> |

Table S5: Minimum inhibitory concentrations of 6 antimicrobials for isolats of *C. jejuni* and *C. coli* from poultry

| Year | Sample No. | Matrix_final           | Antimicrobial panel | GEN     | STR    | NAL | CIP     | TET   | ERY  | Species          |
|------|------------|------------------------|---------------------|---------|--------|-----|---------|-------|------|------------------|
| 2014 | 14-CA00631 | Broiler_caecum_content | EUCAMP2             | 0,25    | 1      | 64  | 8       | <=0,5 | <=1  | <i>C. jejuni</i> |
| 2014 | 14-CA00632 | Broiler_caecum_content | EUCAMP2             | 0,25    | 2      | >64 | >16     | 64    | <=1  | <i>C. coli</i>   |
| 2014 | 14-CA00635 | Broiler_caecum_content | EUCAMP2             | 0,25    | 1      | 2   | 16      | <=0,5 | <=1  | <i>C. jejuni</i> |
| 2014 | 14-CA00636 | Broiler_caecum_content | EUCAMP2             | 0,5     | 1      | >64 | 16      | <=0,5 | <=1  | <i>C. jejuni</i> |
| 2014 | 14-CA00637 | Broiler_caecum_content | EUCAMP2             | 0,5     | 2      | 8   | 0,25    | >64   | <=1  | <i>C. coli</i>   |
| 2014 | 14-CA00683 | Broiler_caecum_content | EUCAMP2             | 0,5     | >16    | 64  | >16     | >64   | >128 | <i>C. coli</i>   |
| 2014 | 14-CA00684 | Broiler_caecum_content | EUCAMP2             | 0,5     | 2      | 8   | 0,25    | <=0,5 | <=1  | <i>C. jejuni</i> |
| 2014 | 14-CA00685 | Broiler_caecum_content | EUCAMP2             | <=0,125 | <=0,25 | 32  | 8       | 16    | <=1  | <i>C. jejuni</i> |
| 2014 | 14-CA00686 | Broiler_caecum_content | EUCAMP2             | 0,5     | 0,5    | 64  | 16      | <=0,5 | <=1  | <i>C. jejuni</i> |
| 2014 | 14-CA00696 | Broiler_caecum_content | EUCAMP2             | 0,5     | 1      | 64  | 16      | <=0,5 | <=1  | <i>C. jejuni</i> |
| 2014 | 14-CA00697 | Turkey_caecum_content  | EUCAMP2             | 0,5     | 2      | >64 | >16     | >64   | 4    | <i>C. coli</i>   |
| 2014 | 14-CA00698 | Turkey_caecum_content  | EUCAMP2             | <=0,125 | 0,5    | 32  | 16      | 32    | <=1  | <i>C. coli</i>   |
| 2014 | 14-CA00699 | Turkey_caecum_content  | EUCAMP2             | 0,5     | 2      | 64  | >16     | 64    | 2    | <i>C. coli</i>   |
| 2014 | 14-CA00700 | Broiler_caecum_content | EUCAMP2             | 0,5     | 2      | 64  | >16     | 2     | 4    | <i>C. jejuni</i> |
| 2014 | 14-CA00701 | Broiler_caecum_content | EUCAMP2             | 0,25    | 1      | >64 | >16     | >64   | <=1  | <i>C. jejuni</i> |
| 2014 | 14-CA00702 | Broiler_caecum_content | EUCAMP2             | 0,5     | 2      | >64 | >16     | 64    | 2    | <i>C. jejuni</i> |
| 2014 | 14-CA00709 | Broiler_caecum_content | EUCAMP2             | 0,5     | 1      | 64  | 16      | 64    | <=1  | <i>C. jejuni</i> |
| 2014 | 14-CA00710 | Broiler_caecum_content | EUCAMP2             | 0,5     | 2      | 4   | 0,25    | <=0,5 | <=1  | <i>C. jejuni</i> |
| 2014 | 14-CA00711 | Broiler_caecum_content | EUCAMP2             | 0,5     | 1      | >64 | 16      | <=0,5 | <=1  | <i>C. jejuni</i> |
| 2014 | 14-CA00712 | Broiler_caecum_content | EUCAMP2             | 0,5     | 1      | 4   | <=0,125 | <=0,5 | <=1  | <i>C. jejuni</i> |
| 2014 | 14-CA00713 | Turkey_caecum_content  | EUCAMP2             | 0,5     | 1      | >64 | >16     | >64   | 2    | <i>C. jejuni</i> |
| 2014 | 14-CA00714 | Turkey_caecum_content  | EUCAMP2             | 0,25    | 1      | >64 | >16     | >64   | <=1  | <i>C. jejuni</i> |
| 2014 | 14-CA00715 | Turkey_caecum_content  | EUCAMP2             | 0,5     | 2      | 8   | 0,25    | >64   | <=1  | <i>C. jejuni</i> |
| 2014 | 14-CA00716 | Turkey_caecum_content  | EUCAMP2             | 0,5     | 1      | 8   | 0,25    | >64   | <=1  | <i>C. jejuni</i> |
| 2014 | 14-CA00717 | Turkey_caecum_content  | EUCAMP2             | 0,5     | 1      | 4   | 0,25    | <=0,5 | <=1  | <i>C. jejuni</i> |
| 2014 | 14-CA00718 | Turkey_caecum_content  | EUCAMP2             | 0,5     | 1      | >64 | >16     | >64   | <=1  | <i>C. jejuni</i> |
| 2014 | 14-CA00719 | Broiler_caecum_content | EUCAMP2             | 0,25    | 1      | >64 | >16     | >64   | <=1  | <i>C. jejuni</i> |
| 2014 | 14-CA00720 | Broiler_caecum_content | EUCAMP2             | 0,5     | 1      | >64 | >16     | <=0,5 | <=1  | <i>C. jejuni</i> |
| 2014 | 14-CA00721 | Turkey_caecum_content  | EUCAMP2             | 0,25    | 0,5    | 64  | >16     | >64   | <=1  | <i>C. jejuni</i> |
| 2014 | 14-CA00722 | Broiler_caecum_content | EUCAMP2             | 0,5     | 1      | >64 | >16     | >64   | <=1  | <i>C. jejuni</i> |
| 2014 | 14-CA00723 | Turkey_caecum_content  | EUCAMP2             | 0,25    | 0,5    | 16  | 1       | <=0,5 | <=1  | <i>C. jejuni</i> |
| 2014 | 14-CA00724 | Turkey_caecum_content  | EUCAMP2             | 0,5     | 1      | 64  | 16      | 64    | >128 | <i>C. jejuni</i> |

Table S5: Minimum inhibitory concentrations of 6 antimicrobials for isolats of *C. jejuni* and *C. coli* from poultry

| Year | Sample No. | Matrix_final           | Antimicrobial panel | GEN     | STR    | NAL | CIP     | TET   | ERY  | Species          |
|------|------------|------------------------|---------------------|---------|--------|-----|---------|-------|------|------------------|
| 2014 | 14-CA00725 | Broiler_caecum_content | EUCAMP2             | 0,25    | 0,5    | 4   | <=0,125 | 32    | <=1  | <i>C. jejuni</i> |
| 2014 | 14-CA00726 | Broiler_caecum_content | EUCAMP2             | <=0,125 | 0,5    | 4   | 0,25    | <=0,5 | <=1  | <i>C. jejuni</i> |
| 2014 | 14-CA00727 | Broiler_caecum_content | EUCAMP2             | 0,25    | 1      | >64 | >16     | >64   | <=1  | <i>C. jejuni</i> |
| 2014 | 14-CA00728 | Broiler_caecum_content | EUCAMP2             | 1       | >16    | 32  | 16      | 64    | <=1  | <i>C. coli</i>   |
| 2014 | 14-CA00729 | Broiler_caecum_content | EUCAMP2             | 0,5     | 1      | 64  | 16      | <=0,5 | <=1  | <i>C. jejuni</i> |
| 2014 | 14-CA00730 | Turkey_caecum_content  | EUCAMP2             | 1       | 4      | 8   | 0,25    | 64    | <=1  | <i>C. coli</i>   |
| 2014 | 14-CA00731 | Turkey_caecum_content  | EUCAMP2             | 0,25    | 0,5    | <=1 | 16      | 64    | <=1  | <i>C. jejuni</i> |
| 2014 | 14-CA00732 | Broiler_caecum_content | EUCAMP2             | 0,25    | 0,5    | <=1 | 8       | 2     | <=1  | <i>C. jejuni</i> |
| 2014 | 14-CA00733 | Broiler_caecum_content | EUCAMP2             | 1       | 2      | 4   | <=0,125 | <=0,5 | <=1  | <i>C. jejuni</i> |
| 2014 | 14-CA00734 | Broiler_caecum_content | EUCAMP2             | 1       | 2      | >64 | 16      | 64    | <=1  | <i>C. jejuni</i> |
| 2014 | 14-CA00735 | Broiler_caecum_content | EUCAMP2             | 0,5     | 2      | 64  | >16     | 64    | >128 | <i>C. coli</i>   |
| 2014 | 14-CA00736 | Turkey_caecum_content  | EUCAMP2             | 0,5     | 2      | 8   | 0,25    | 64    | <=1  | <i>C. coli</i>   |
| 2014 | 14-CA00737 | Turkey_caecum_content  | EUCAMP2             | 0,5     | 1      | >64 | >16     | >64   | >128 | <i>C. coli</i>   |
| 2014 | 14-CA00738 | Turkey_caecum_content  | EUCAMP2             | 0,25    | 1      | 16  | 8       | <=0,5 | <=1  | <i>C. coli</i>   |
| 2014 | 14-CA00738 | Turkey_caecum_content  | EUCAMP2             | 0,5     | 2      | 64  | >16     | >64   | <=1  | <i>C. jejuni</i> |
| 2014 | 14-CA00739 | Turkey_caecum_content  | EUCAMP2             | 1       | >16    | >64 | 16      | 4     | 2    | <i>C. jejuni</i> |
| 2014 | 14-CA00740 | Turkey_caecum_content  | EUCAMP2             | 1       | >16    | >64 | 16      | 64    | <=1  | <i>C. jejuni</i> |
| 2014 | 14-CA00741 | Turkey_caecum_content  | EUCAMP2             | 0,5     | 1      | 32  | 16      | 16    | <=1  | <i>C. jejuni</i> |
| 2014 | 14-CA00742 | Turkey_caecum_content  | EUCAMP2             | >16     | >16    | >64 | >16     | >64   | >128 | <i>C. coli</i>   |
| 2014 | 14-CA00743 | Broiler_caecum_content | EUCAMP2             | 0,5     | 2      | >64 | >16     | >64   | 2    | <i>C. jejuni</i> |
| 2014 | 14-CA00744 | Broiler_caecum_content | EUCAMP2             | 1       | 4      | >64 | 16      | >64   | <=1  | <i>C. coli</i>   |
| 2014 | 14-CA00745 | Broiler_caecum_content | EUCAMP2             | <=0,125 | <=0,25 | 32  | 16      | >64   | <=1  | <i>C. jejuni</i> |
| 2014 | 14-CA00746 | Broiler_caecum_content | EUCAMP2             | 0,5     | 2      | >64 | >16     | >64   | <=1  | <i>C. coli</i>   |
| 2014 | 14-CA00747 | Broiler_caecum_content | EUCAMP2             | 0,5     | 2      | 4   | <=0,125 | <=0,5 | <=1  | <i>C. jejuni</i> |
| 2014 | 14-CA00748 | Broiler_caecum_content | EUCAMP2             | 0,5     | 2      | 64  | >16     | 64    | <=1  | <i>C. coli</i>   |
| 2014 | 14-CA00749 | Turkey_caecum_content  | EUCAMP2             | 1       | >16    | 64  | 16      | >64   | >128 | <i>C. coli</i>   |
| 2014 | 14-CA00750 | Turkey_caecum_content  | EUCAMP2             | 0,5     | 1      | 16  | 8       | 16    | <=1  | <i>C. jejuni</i> |
| 2014 | 14-CA00751 | Turkey_caecum_content  | EUCAMP2             | 0,5     | 1      | 4   | <=0,125 | <=0,5 | <=1  | <i>C. jejuni</i> |
| 2014 | 14-CA00752 | Turkey_caecum_content  | EUCAMP2             | 0,5     | 2      | 32  | 16      | >64   | >128 | <i>C. coli</i>   |
| 2014 | 14-CA00753 | Turkey_caecum_content  | EUCAMP2             | 0,5     | 2      | 32  | 16      | 16    | <=1  | <i>C. jejuni</i> |
| 2014 | 14-CA00754 | Turkey_caecum_content  | EUCAMP2             | 0,25    | 1      | 32  | 16      | >64   | <=1  | <i>C. coli</i>   |
| 2014 | 14-CA00755 | Turkey_caecum_content  | EUCAMP2             | 0,5     | 2      | 64  | >16     | >64   | 2    | <i>C. coli</i>   |

Table S5: Minimum inhibitory concentrations of 6 antimicrobials for isolats of *C. jejuni* and *C. coli* from poultry

| Year | Sample No. | Matrix_final           | Antimicrobial panel | GEN     | STR    | NAL | CIP     | TET   | ERY Species          |
|------|------------|------------------------|---------------------|---------|--------|-----|---------|-------|----------------------|
| 2014 | 14-CA00756 | Turkey_caecum_content  | EUCAMP2             | 0,5     | 1      | 4   | <=0,125 | <=0,5 | <=1 <i>C. jejuni</i> |
| 2014 | 14-CA00757 | Turkey_caecum_content  | EUCAMP2             | 0,5     | 2      | 32  | 16      | 32    | >128 <i>C. coli</i>  |
| 2014 | 14-CA00758 | Turkey_caecum_content  | EUCAMP2             | 0,5     | 1      | 4   | <=0,125 | <=0,5 | <=1 <i>C. jejuni</i> |
| 2014 | 14-CA00759 | Turkey_caecum_content  | EUCAMP2             | 0,5     | 0,5    | 8   | 0,25    | <=0,5 | <=1 <i>C. jejuni</i> |
| 2014 | 14-CA00760 | Broiler_caecum_content | EUCAMP2             | 1       | >16    | 64  | 16      | >64   | >128 <i>C. coli</i>  |
| 2014 | 14-CA00761 | Broiler_caecum_content | EUCAMP2             | 0,25    | <=0,25 | 8   | 0,25    | 32    | <=1 <i>C. jejuni</i> |
| 2014 | 14-CA00762 | Broiler_caecum_content | EUCAMP2             | <=0,125 | <=0,25 | 32  | 16      | 64    | <=1 <i>C. jejuni</i> |
| 2014 | 14-CA00763 | Broiler_caecum_content | EUCAMP2             | 0,25    | <=0,25 | 64  | 16      | 32    | <=1 <i>C. jejuni</i> |
| 2014 | 14-CA00764 | Broiler_caecum_content | EUCAMP2             | 0,25    | 0,5    | 64  | 16      | 32    | <=1 <i>C. coli</i>   |
| 2014 | 14-CA00765 | Broiler_caecum_content | EUCAMP2             | 0,5     | 1      | 64  | 16      | <=0,5 | <=1 <i>C. jejuni</i> |
| 2014 | 14-CA00766 | Broiler_caecum_content | EUCAMP2             | <=0,125 | 0,5    | 16  | 4       | <=0,5 | <=1 <i>C. jejuni</i> |
| 2014 | 14-CA00767 | Turkey_caecum_content  | EUCAMP2             | 0,25    | 1      | 32  | >16     | >64   | <=1 <i>C. jejuni</i> |
| 2014 | 14-CA00768 | Turkey_caecum_content  | EUCAMP2             | 0,5     | 2      | 64  | 16      | 16    | <=1 <i>C. jejuni</i> |
| 2014 | 14-CA00769 | Turkey_caecum_content  | EUCAMP2             | 0,5     | 0,5    | 2   | 0,5     | >64   | <=1 <i>C. jejuni</i> |
| 2014 | 14-CA00770 | Turkey_caecum_content  | EUCAMP2             | 0,5     | 2      | 64  | >16     | >64   | <=1 <i>C. coli</i>   |
| 2014 | 14-CA00771 | Turkey_caecum_content  | EUCAMP2             | 0,5     | 1      | 64  | 16      | <=0,5 | <=1 <i>C. jejuni</i> |
| 2014 | 14-CA00772 | Turkey_caecum_content  | EUCAMP2             | 0,5     | 2      | 64  | >16     | >64   | >128 <i>C. coli</i>  |
| 2014 | 14-CA00773 | Turkey_caecum_content  | EUCAMP2             | 0,5     | 1      | 4   | 0,25    | <=0,5 | <=1 <i>C. jejuni</i> |
| 2014 | 14-CA00774 | Turkey_caecum_content  | EUCAMP2             | <=0,125 | 1      | 2   | <=0,125 | 16    | <=1 <i>C. jejuni</i> |
| 2014 | 14-CA00775 | Turkey_caecum_content  | EUCAMP2             | 0,25    | 1      | 4   | <=0,125 | <=0,5 | <=1 <i>C. jejuni</i> |
| 2014 | 14-CA00776 | Broiler_caecum_content | EUCAMP2             | 0,5     | 1      | 64  | >16     | 64    | >128 <i>C. coli</i>  |
| 2014 | 14-CA00777 | Broiler_caecum_content | EUCAMP2             | 0,5     | 2      | >64 | >16     | <=0,5 | <=1 <i>C. coli</i>   |
| 2014 | 14-CA00778 | Broiler_caecum_content | EUCAMP2             | 0,25    | 1      | 32  | 16      | 64    | <=1 <i>C. coli</i>   |
| 2014 | 14-CA00779 | Broiler_caecum_content | EUCAMP2             | 1       | 1      | 8   | 0,25    | <=0,5 | <=1 <i>C. jejuni</i> |
| 2014 | 14-CA00780 | Broiler_caecum_content | EUCAMP2             | 0,25    | 1      | 64  | >16     | >64   | <=1 <i>C. jejuni</i> |
| 2014 | 14-CA00781 | Broiler_caecum_content | EUCAMP2             | 0,5     | 1      | 64  | >16     | 64    | >128 <i>C. coli</i>  |
| 2014 | 14-CA00782 | Broiler_caecum_content | EUCAMP2             | <=0,125 | 0,5    | 32  | >16     | >64   | <=1 <i>C. jejuni</i> |
| 2014 | 14-CA00783 | Broiler_caecum_content | EUCAMP2             | 0,5     | 1      | 32  | >16     | 64    | >128 <i>C. coli</i>  |
| 2014 | 14-CA00784 | Broiler_caecum_content | EUCAMP2             | 0,25    | 0,5    | 4   | 0,25    | 8     | <=1 <i>C. jejuni</i> |
| 2014 | 14-CA00785 | Turkey_caecum_content  | EUCAMP2             | 0,25    | 0,5    | 4   | 0,25    | 64    | <=1 <i>C. jejuni</i> |
| 2014 | 14-CA00786 | Turkey_caecum_content  | EUCAMP2             | 0,25    | 0,5    | 4   | <=0,125 | 64    | <=1 <i>C. jejuni</i> |
| 2014 | 14-CA00787 | Turkey_caecum_content  | EUCAMP2             | 0,25    | 1      | 16  | 0,5     | 1     | <=1 <i>C. jejuni</i> |

Table S5: Minimum inhibitory concentrations of 6 antimicrobials for isolats of *C. jejuni* and *C. coli* from poultry

| Year | Sample No. | Matrix_final           | Antimicrobial panel | GEN      | STR    | NAL    | CIP         | TET   | ERY  | Species          |
|------|------------|------------------------|---------------------|----------|--------|--------|-------------|-------|------|------------------|
| 2014 | 14-CA00788 | Turkey_caecum_content  | EUCAMP2             | <=0,125  | 0,5    | 4      | <=0,125     | <=0,5 | <=1  | <i>C. jejuni</i> |
| 2014 | 14-CA00789 | Broiler_caecum_content | EUCAMP2             | 1        | 2 >64  |        | 16          | 64    | <=1  | <i>C. jejuni</i> |
| 2014 | 14-CA00790 | Turkey_caecum_content  | EUCAMP2             | 0,25     | 0,5    | 32     | 8           | 64    | 128  | <i>C. coli</i>   |
| 2014 | 14-CA00791 | Turkey_caecum_content  | EUCAMP2             | 0,5      | 1      | >64    | >16         | >64   | <=1  | <i>C. coli</i>   |
| 2014 | 14-CA00792 | Turkey_caecum_content  | EUCAMP2             | 0,25     | 2      | 64 >16 | >64         | >128  |      | <i>C. coli</i>   |
| 2014 | 14-CA00793 | Turkey_caecum_content  | EUCAMP2             | 0,5      | 2      | 4      | 0,25        | <=0,5 | <=1  | <i>C. jejuni</i> |
| 2014 | 14-CA00794 | Turkey_caecum_content  | EUCAMP2             | 0,25 >16 | <=1    |        | 0,25        | 64    | <=1  | <i>C. jejuni</i> |
| 2014 | 14-CA00795 | Turkey_caecum_content  | EUCAMP2             | 0,5      | 2      | 64     | 16          | 32    | <=1  | <i>C. coli</i>   |
| 2014 | 14-CA00796 | Turkey_caecum_content  | EUCAMP2             | 0,5      | 2      | 64     | 16          | 64    | <=1  | <i>C. coli</i>   |
| 2014 | 14-CA00797 | Turkey_caecum_content  | EUCAMP2             | 0,5      | 2      | 64     | 8           | <=0,5 | <=1  | <i>C. coli</i>   |
| 2014 | 14-CA00798 | Broiler_caecum_content | EUCAMP2             | 0,5      | 1      | >64    | >16         | >64   | >128 | <i>C. coli</i>   |
| 2014 | 14-CA00799 | Broiler_caecum_content | EUCAMP2             | 0,5      | 2      | 4      | <=0,125     | <=0,5 | <=1  | <i>C. jejuni</i> |
| 2014 | 14-CA00800 | Broiler_caecum_content | EUCAMP2             | 0,25     | 0,5    | 64 >16 |             | 32    | <=1  | <i>C. jejuni</i> |
| 2014 | 14-CA00801 | Broiler_caecum_content | EUCAMP2             | 0,25     | 0,5    | 64     | 16          | 32    | <=1  | <i>C. coli</i>   |
| 2014 | 14-CA00802 | Broiler_caecum_content | EUCAMP2             | 0,5      | 2      | 64     | >16         | 64    | 2    | <i>C. coli</i>   |
| 2014 | 14-CA00803 | Turkey_caecum_content  | EUCAMP2             | 0,25     | 1      | 4      | 0,25        | 32    | <=1  | <i>C. coli</i>   |
| 2014 | 14-CA00804 | Turkey_caecum_content  | EUCAMP2             | 1        | 4      | 8      | <=0,125 >64 | <=1   |      | <i>C. coli</i>   |
| 2014 | 14-CA00805 | Turkey_caecum_content  | EUCAMP2             | 0,5      | 2      | >64    | >16         | >64   | >128 | <i>C. coli</i>   |
| 2014 | 14-CA00806 | Broiler_caecum_content | EUCAMP2             | 0,5      | 1      | 4      | 0,25        | >64   | <=1  | <i>C. jejuni</i> |
| 2014 | 14-CA00807 | Broiler_caecum_content | EUCAMP2             | 0,5      | 2      | 4      | 0,25        | 64    | <=1  | <i>C. jejuni</i> |
| 2014 | 14-CA00808 | Broiler_caecum_content | EUCAMP2             | 0,25     | 0,5    | 4      | 0,25        | 64    | <=1  | <i>C. jejuni</i> |
| 2014 | 14-CA00809 | Broiler_caecum_content | EUCAMP2             | 0,5      | 1      | 4      | 0,25        | >64   | <=1  | <i>C. jejuni</i> |
| 2014 | 14-CA00810 | Broiler_caecum_content | EUCAMP2             | 0,25     | 0,5    | 4      | 0,25        | 64    | <=1  | <i>C. jejuni</i> |
| 2014 | 14-CA00811 | Broiler_caecum_content | EUCAMP2             | 0,5      | 2      | 4      | <=0,125     | <=0,5 | <=1  | <i>C. jejuni</i> |
| 2014 | 14-CA00812 | Broiler_caecum_content | EUCAMP2             | 0,5      | 2      | >64    | >16         | >64   | <=1  | <i>C. coli</i>   |
| 2014 | 14-CA00814 | Turkey_caecum_content  | EUCAMP2             | 0,5      | >16    | 32     | 16          | >64   | >128 | <i>C. coli</i>   |
| 2014 | 14-CA00815 | Turkey_caecum_content  | EUCAMP2             | 1        | 2      | 4      | <=0,125     | <=0,5 | <=1  | <i>C. jejuni</i> |
| 2014 | 14-CA00816 | Turkey_caecum_content  | EUCAMP2             | 0,5      | 2      | <=1    | >16         | 64    | <=1  | <i>C. jejuni</i> |
| 2014 | 14-CA00817 | Turkey_caecum_content  | EUCAMP2             | 1        | 4 >64  |        | 16          | <=0,5 | 2    | <i>C. coli</i>   |
| 2014 | 14-CA00825 | Broiler_caecum_content | EUCAMP2             | 0,5      | 1      | 4      | <=0,125     | <=0,5 | 2    | <i>C. jejuni</i> |
| 2014 | 14-CA00826 | Broiler_caecum_content | EUCAMP2             | 0,5      | 1      | 4      | 0,25        | 16    | <=1  | <i>C. jejuni</i> |
| 2014 | 14-CA00845 | Broiler_caecum_content | EUCAMP2             | <=0,125  | <=0,25 | 8      | 0,25        | <=0,5 | <=1  | <i>C. jejuni</i> |

Table S5: Minimum inhibitory concentrations of 6 antimicrobials for isolats of *C. jejuni* and *C. coli* from poultry

| Year | Sample No. | Matrix_final           | Antimicrobial panel | GEN     | STR    | NAL | CIP     | TET   | ERY  | Species          |
|------|------------|------------------------|---------------------|---------|--------|-----|---------|-------|------|------------------|
| 2014 | 14-CA00846 | Broiler_caecum_content | EUCAMP2             | 0,5     | 2      | 64  | >16     | >64   | 2    | <i>C. coli</i>   |
| 2014 | 14-CA00882 | Broiler_caecum_content | EUCAMP2             | 1       | 2      | 8   | 0,25    | 64    | <=1  | <i>C. coli</i>   |
| 2014 | 14-CA00882 | Broiler_caecum_content | EUCAMP2             | 0,5     | 1      | 4   | 0,25    | <=0,5 | <=1  | <i>C. jejuni</i> |
| 2014 | 14-CA00883 | Broiler_caecum_content | EUCAMP2             | <=0,125 | <=0,25 | 32  | 8       | <=0,5 | <=1  | <i>C. jejuni</i> |
| 2014 | 14-CA00884 | Broiler_caecum_content | EUCAMP2             | 0,5     | 1      | 64  | 16      | <=0,5 | <=1  | <i>C. jejuni</i> |
| 2014 | 14-CA00885 | Broiler_caecum_content | EUCAMP2             | 0,5     | 0,5    | 8   | 0,25    | <=0,5 | <=1  | <i>C. jejuni</i> |
| 2014 | 14-CA00934 | Broiler_caecum_content | EUCAMP2             | 1       | 2      | 64  | 16      | 64    | <=1  | <i>C. coli</i>   |
| 2014 | 14-CA00935 | Broiler_caecum_content | EUCAMP2             | 1       | 4      | >64 | 16      | 64    | <=1  | <i>C. coli</i>   |
| 2014 | 14-CA00985 | Turkey_caecum_content  | EUCAMP2             | 0,5     | 1      | >64 | >16     | <=0,5 | <=1  | <i>C. jejuni</i> |
| 2014 | 14-CA00986 | Turkey_caecum_content  | EUCAMP2             | 0,5     | 2      | 64  | 16      | 64    | <=1  | <i>C. jejuni</i> |
| 2014 | 14-CA00987 | Turkey_caecum_content  | EUCAMP2             | 0,5     | 1      | 64  | >16     | 16    | <=1  | <i>C. jejuni</i> |
| 2014 | 14-CA00988 | Turkey_caecum_content  | EUCAMP2             | 0,5     | 1      | 64  | 16      | <=0,5 | <=1  | <i>C. jejuni</i> |
| 2014 | 14-CA00997 | Turkey_caecum_content  | EUCAMP2             | 0,25    | 0,5    | 64  | >16     | >64   | <=1  | <i>C. jejuni</i> |
| 2014 | 14-CA00998 | Broiler_caecum_content | EUCAMP2             | 0,25    | 0,5    | 32  | >16     | >64   | >128 | <i>C. jejuni</i> |
| 2014 | 14-CA00999 | Broiler_caecum_content | EUCAMP2             | 0,25    | 0,5    | 64  | >16     | >64   | >128 | <i>C. jejuni</i> |
| 2014 | 14-CA01000 | Broiler_caecum_content | EUCAMP2             | 0,5     | 2      | 2   | >16     | >64   | <=1  | <i>C. jejuni</i> |
| 2014 | 14-CA01001 | Broiler_caecum_content | EUCAMP2             | 0,25    | 1      | 32  | 16      | <=0,5 | <=1  | <i>C. jejuni</i> |
| 2014 | 14-CA01006 | Turkey_caecum_content  | EUCAMP2             | <=0,125 | 0,5    | 32  | 16      | 64    | >128 | <i>C. coli</i>   |
| 2014 | 14-CA01007 | Turkey_caecum_content  | EUCAMP2             | <=0,125 | 0,5    | 32  | 16      | 64    | 128  | <i>C. coli</i>   |
| 2014 | 14-CA01008 | Turkey_caecum_content  | EUCAMP2             | 0,5     | 2      | 4   | <=0,125 | <=0,5 | <=1  | <i>C. jejuni</i> |
| 2014 | 14-CA01009 | Turkey_caecum_content  | EUCAMP2             | 0,5     | 2      | 4   | 0,25    | <=0,5 | <=1  | <i>C. jejuni</i> |
| 2014 | 14-CA01010 | Turkey_caecum_content  | EUCAMP2             | 1       | 4      | 64  | 16      | 64    | <=1  | <i>C. coli</i>   |
| 2014 | 14-CA01011 | Turkey_caecum_content  | EUCAMP2             | 1       | 4      | >64 | 2       | <=0,5 | 16   | <i>C. jejuni</i> |
| 2014 | 14-CA01012 | Turkey_caecum_content  | EUCAMP2             | 0,5     | 2      | 64  | >16     | 64    | >128 | <i>C. coli</i>   |
| 2014 | 14-CA01013 | Turkey_caecum_content  | EUCAMP2             | 0,5     | 1      | 64  | 16      | <=0,5 | <=1  | <i>C. jejuni</i> |
| 2014 | 14-CA01014 | Turkey_caecum_content  | EUCAMP2             | 0,25    | 1      | 64  | 16      | 64    | <=1  | <i>C. jejuni</i> |
| 2014 | 14-CA01015 | Turkey_caecum_content  | EUCAMP2             | 0,5     | 2      | 64  | >16     | >64   | >128 | <i>C. coli</i>   |
| 2014 | 14-CA01016 | Turkey_caecum_content  | EUCAMP2             | 0,5     | >16    | >64 | >16     | <=0,5 | 2    | <i>C. coli</i>   |
| 2014 | 14-CA01017 | Turkey_caecum_content  | EUCAMP2             | 0,5     | >16    | 64  | 16      | 64    | <=1  | <i>C. coli</i>   |
| 2014 | 14-CA01018 | Broiler_caecum_content | EUCAMP2             | 0,5     | 1      | 8   | 0,5     | 32    | <=1  | <i>C. coli</i>   |
| 2014 | 14-CA01019 | Broiler_caecum_content | EUCAMP2             | 0,25    | 1      | 16  | 8       | 32    | 128  | <i>C. coli</i>   |
| 2014 | 14-CA01020 | Broiler_caecum_content | EUCAMP2             | <=0,125 | <=0,25 | 2   | <=0,125 | 32    | <=1  | <i>C. coli</i>   |



Table S5: Minimum inhibitory concentrations of 6 antimicrobials for isolats of *C. jejuni* and *C. coli* from poultry

| Year | Sample No. | Matrix_final           | Antimicrobial panel | GEN     | STR | NAL       | CIP        | TET    | ERY Species           |
|------|------------|------------------------|---------------------|---------|-----|-----------|------------|--------|-----------------------|
| 2014 | 14-CA01021 | Broiler_caecum_content | EUCAMP2             | 0,5     | 1   | 64        | 16         | 64     | <=1 <i>C. jejuni</i>  |
| 2014 | 14-CA01022 | Broiler_caecum_content | EUCAMP2             | 1       | 2   | 64 >16    | >64        | <=1    | <i>C. coli</i>        |
| 2014 | 14-CA01023 | Broiler_caecum_content | EUCAMP2             | 0,25    | 2   | 4         | 0,25 <=0,5 | <=1    | <i>C. jejuni</i>      |
| 2014 | 14-CA01024 | Broiler_caecum_content | EUCAMP2             | 0,25    | 1   | 64        | 16 >64     | <=1    | <i>C. coli</i>        |
| 2014 | 14-CA01025 | Broiler_caecum_content | EUCAMP2             | 0,25    | 2   | 64 >16    | >64        | <=1    | <i>C. coli</i>        |
| 2014 | 14-CA01026 | Turkey_caecum_content  | EUCAMP2             | 0,5     | 2   | >64       | >16        | <=0,5  | 2 <i>C. jejuni</i>    |
| 2014 | 14-CA01027 | Turkey_caecum_content  | EUCAMP2             | <=0,125 | 0,5 | 16        | 16         | 32 <=1 | <i>C. coli</i>        |
| 2014 | 14-CA01028 | Turkey_caecum_content  | EUCAMP2             | 0,5     | >16 | 4 <=0,125 | 64         | <=1    | <i>C. jejuni</i>      |
| 2014 | 14-CA01029 | Turkey_caecum_content  | EUCAMP2             | 0,5     | 2   | 64        | >16        | 64     | <=1 <i>C. jejuni</i>  |
| 2014 | 14-CA01030 | Turkey_caecum_content  | EUCAMP2             | 0,5     | 4   | 16        | 16         | <=0,5  | 32 <i>C. coli</i>     |
| 2014 | 14-CA01031 | Turkey_caecum_content  | EUCAMP2             | 0,25    | 0,5 | 32 >16    | >64        | <=1    | <i>C. jejuni</i>      |
| 2014 | 14-CA01032 | Turkey_caecum_content  | EUCAMP2             | 0,5     | 2   | 32        | >16        | 64     | >128 <i>C. jejuni</i> |
| 2014 | 14-CA01033 | Turkey_caecum_content  | EUCAMP2             | 0,25    | 1   | 32        | 16         | 64     | 128 <i>C. jejuni</i>  |
| 2014 | 14-CA01034 | Broiler_caecum_content | EUCAMP2             | <=0,125 | 2   | 16        | 8          | 32     | 4 <i>C. coli</i>      |
| 2014 | 14-CA01035 | Broiler_caecum_content | EUCAMP2             | 0,25    | 1   | 32 >16    | >64        | <=1    | <i>C. jejuni</i>      |
| 2014 | 14-CA01036 | Broiler_caecum_content | EUCAMP2             | 0,5     | 1   | 64        | >16        | >64    | <=1 <i>C. coli</i>    |
| 2014 | 14-CA01037 | Broiler_caecum_content | EUCAMP2             | 0,5     | 1   | >64       | >16        | >64    | <=1 <i>C. jejuni</i>  |
| 2014 | 14-CA01038 | Broiler_caecum_content | EUCAMP2             | 0,5     | 1   | 64        | 16         | >64    | 2 <i>C. jejuni</i>    |
| 2014 | 14-CA01039 | Broiler_caecum_content | EUCAMP2             | 0,25    | 0,5 | 32 >16    | >64        | >128   | <i>C. jejuni</i>      |
| 2014 | 14-CA01040 | Broiler_caecum_content | EUCAMP2             | 0,5     | 1   | >64       | >16        | >64    | <=1 <i>C. jejuni</i>  |
| 2014 | 14-CA01041 | Broiler_caecum_content | EUCAMP2             | 0,5     | 1   | >64       | >16        | >64    | 4 <i>C. coli</i>      |
| 2014 | 14-CA01042 | Broiler_caecum_content | EUCAMP2             | <=0,125 | 1   | 64 >16    |            | 64 <=1 | <i>C. jejuni</i>      |
| 2014 | 14-CA01043 | Turkey_caecum_content  | EUCAMP2             | 0,5     | 2   | 64        | >16        | >64    | >128 <i>C. coli</i>   |
| 2014 | 14-CA01044 | Turkey_caecum_content  | EUCAMP2             | 0,25    | 1   | 64 >16    | >64        | <=1    | <i>C. jejuni</i>      |
| 2014 | 14-CA01045 | Turkey_caecum_content  | EUCAMP2             | 0,25    | 1   | 64        | 16 <=0,5   | <=1    | <i>C. jejuni</i>      |
| 2014 | 14-CA01046 | Turkey_caecum_content  | EUCAMP2             | <=0,125 | 0,5 | 64        | 16         | 64 <=1 | <i>C. jejuni</i>      |
| 2014 | 14-CA01047 | Turkey_caecum_content  | EUCAMP2             | 2 >16   | >64 | >16       | >64        |        | 4 <i>C. coli</i>      |
| 2014 | 14-CA01048 | Turkey_caecum_content  | EUCAMP2             | 0,5     | 2   | 4         | 0,5        | <=0,5  | 2 <i>C. jejuni</i>    |
| 2014 | 14-CA01049 | Turkey_caecum_content  | EUCAMP2             | 0,25    | 1   | 32        | 16         | 32 <=1 | <i>C. jejuni</i>      |
| 2014 | 14-CA01050 | Turkey_caecum_content  | EUCAMP2             | 0,5     | 1   | 16        | 4          | 32     | 32 <i>C. coli</i>     |
| 2014 | 14-CA01051 | Turkey_caecum_content  | EUCAMP2             | 0,5     | 1   | 64        | 16         | 64     | <=1 <i>C. coli</i>    |
| 2014 | 14-CA01052 | Turkey_caecum_content  | EUCAMP2             | 0,5     | 2   | 4         | 0,25       | <=0,5  | <=1 <i>C. jejuni</i>  |

Table S5: Minimum inhibitory concentrations of 6 antimicrobials for isolats of *C. jejuni* and *C. coli* from poultry

| Year | Sample No. | Matrix_final           | Antimicrobial panel | GEN   | STR     | NAL       | CIP        | TET    | ERY  | Species          |
|------|------------|------------------------|---------------------|-------|---------|-----------|------------|--------|------|------------------|
| 2014 | 14-CA01053 | Broiler_caecum_content | EUCAMP2             | 0,25  | 0,5 >64 | >16       |            | 64 <=1 |      | <i>C. jejuni</i> |
| 2014 | 14-CA01054 | Broiler_caecum_content | EUCAMP2             | 0,25  | 2       | 64        | 16         | 64 <=1 |      | <i>C. coli</i>   |
| 2014 | 14-CA01055 | Broiler_caecum_content | EUCAMP2             | 0,5   | 2       | 4         | 0,25       | <=0,5  | <=1  | <i>C. jejuni</i> |
| 2014 | 14-CA01056 | Broiler_caecum_content | EUCAMP2             | 0,5   | 2       | 64        | >16        | 64     | >128 | <i>C. coli</i>   |
| 2014 | 14-CA01057 | Broiler_caecum_content | EUCAMP2             | 1     | 2 >64   |           | 16         | 64 <=1 |      | <i>C. coli</i>   |
| 2014 | 14-CA01058 | Broiler_caecum_content | EUCAMP2             | 0,5   | 2       | 64        | >16        | >64    | >128 | <i>C. coli</i>   |
| 2014 | 14-CA01059 | Broiler_caecum_content | EUCAMP2             | 1     | 4       | 64 >16    | >64        | <=1    |      | <i>C. coli</i>   |
| 2014 | 14-CA01060 | Broiler_caecum_content | EUCAMP2             | 0,5   | >16     | 64        | >16        | >64    | >128 | <i>C. coli</i>   |
| 2014 | 14-CA01061 | Broiler_caecum_content | EUCAMP2             | 0,5   | >16     | 32        | 16         | >64    | >128 | <i>C. coli</i>   |
| 2014 | 14-CA01062 | Broiler_caecum_content | EUCAMP2             | 0,25  | 0,5 <=1 |           | 16         | 64 <=1 |      | <i>C. jejuni</i> |
| 2014 | 14-CA01063 | Broiler_caecum_content | EUCAMP2             | 1 >16 |         | 4         | 0,25       | 64     | 2    | <i>C. coli</i>   |
| 2014 | 14-CA01064 | Broiler_caecum_content | EUCAMP2             | 0,5   | 2       | >64       | 8          | <=0,5  | 2    | <i>C. jejuni</i> |
| 2014 | 14-CA01065 | Turkey_caecum_content  | EUCAMP2             | 0,25  | 1       | 4 <=0,125 | <=0,5      | <=1    |      | <i>C. jejuni</i> |
| 2014 | 14-CA01066 | Turkey_caecum_content  | EUCAMP2             | 0,5   | >16     | 64        | >16        | >64    | >128 | <i>C. coli</i>   |
| 2014 | 14-CA01067 | Turkey_caecum_content  | EUCAMP2             | 0,5   | >16     | 64        | >16        | >64    | >128 | <i>C. coli</i>   |
| 2014 | 14-CA01068 | Turkey_caecum_content  | EUCAMP2             | 0,5   | 2       | 4 <=0,125 |            | 64     | <=1  | <i>C. jejuni</i> |
| 2014 | 14-CA01069 | Turkey_caecum_content  | EUCAMP2             | 0,5   | 2       | 64        | 16         | 64     | <=1  | <i>C. coli</i>   |
| 2014 | 14-CA01070 | Turkey_caecum_content  | EUCAMP2             | 0,5   | 2       | 2 <=0,125 |            | 64     | <=1  | <i>C. jejuni</i> |
| 2014 | 14-CA01071 | Broiler_caecum_content | EUCAMP2             | 0,5   | 1       | 4 <=0,125 | <=0,5      | <=1    |      | <i>C. jejuni</i> |
| 2014 | 14-CA01072 | Broiler_caecum_content | EUCAMP2             | 0,5   | 1       | 4 <=0,125 | >64        | <=1    |      | <i>C. jejuni</i> |
| 2014 | 14-CA01073 | Broiler_caecum_content | EUCAMP2             | 0,5   | 1       | 2 <=0,125 | >64        | <=1    |      | <i>C. jejuni</i> |
| 2014 | 14-CA01074 | Broiler_caecum_content | EUCAMP2             | 0,5   | 2       | 64        | 16         | >64    | <=1  | <i>C. jejuni</i> |
| 2014 | 14-CA01075 | Turkey_caecum_content  | EUCAMP2             | 1     | 4 >64   | >16       | >64        | <=1    |      | <i>C. jejuni</i> |
| 2014 | 14-CA01076 | Turkey_caecum_content  | EUCAMP2             | 1     | 4 >64   |           | 8 <=0,5    | <=1    |      | <i>C. coli</i>   |
| 2014 | 14-CA01077 | Turkey_caecum_content  | EUCAMP2             | 0,25  | 0,5     | 4         | 0,25 >64   | <=1    |      | <i>C. jejuni</i> |
| 2014 | 14-CA01078 | Turkey_caecum_content  | EUCAMP2             | 0,5   | 2       | 64        | 16         | >64    | <=1  | <i>C. jejuni</i> |
| 2014 | 14-CA01079 | Broiler_caecum_content | EUCAMP2             | 0,5   | 1       | 64        | >16        | >64    | <=1  | <i>C. jejuni</i> |
| 2014 | 14-CA01080 | Broiler_caecum_content | EUCAMP2             | 1     | 2       | 4         | 0,25 <=0,5 | <=1    |      | <i>C. jejuni</i> |
| 2014 | 14-CA01081 | Broiler_caecum_content | EUCAMP2             | 0,5   | 4       | 4 <=0,125 |            | 16     | <=1  | <i>C. jejuni</i> |
| 2014 | 14-CA01082 | Broiler_caecum_content | EUCAMP2             | 0,25  | 1       | 64 >16    | >64        | <=1    |      | <i>C. jejuni</i> |
| 2014 | 14-CA01083 | Turkey_caecum_content  | EUCAMP2             | 0,25  | 1       | 64 >16    | >64        | <=1    |      | <i>C. jejuni</i> |
| 2014 | 14-CA01084 | Turkey_caecum_content  | EUCAMP2             | 0,5   | 2       | 4 <=0,125 | <=0,5      | <=1    |      | <i>C. jejuni</i> |

Table S5: Minimum inhibitory concentrations of 6 antimicrobials for isolats of *C. jejuni* and *C. coli* from poultry

| Year | Sample No. | Matrix_final           | Antimicrobial panel | GEN     | STR    | NAL | CIP     | TET   | ERY Species          |
|------|------------|------------------------|---------------------|---------|--------|-----|---------|-------|----------------------|
| 2014 | 14-CA01085 | Turkey_caecum_content  | EUCAMP2             | 0,5     | 2      | 4   | <=0,125 | <=0,5 | <=1 <i>C. jejuni</i> |
| 2014 | 14-CA01086 | Turkey_caecum_content  | EUCAMP2             | 0,5     | 1      | 64  | 16      | >64   | <=1 <i>C. jejuni</i> |
| 2014 | 14-CA01087 | Turkey_caecum_content  | EUCAMP2             | 0,5     | 2      | >64 | 16      | >64   | 2 <i>C. jejuni</i>   |
| 2014 | 14-CA01088 | Turkey_caecum_content  | EUCAMP2             | 0,5     | 1      | 4   | <=0,125 | <=0,5 | <=1 <i>C. jejuni</i> |
| 2014 | 14-CA01089 | Turkey_caecum_content  | EUCAMP2             | 0,5     | 1      | 64  | 16      | <=0,5 | <=1 <i>C. jejuni</i> |
| 2014 | 14-CA01090 | Turkey_caecum_content  | EUCAMP2             | 0,5     | 1      | 64  | 16      | <=0,5 | <=1 <i>C. jejuni</i> |
| 2014 | 14-CA01091 | Broiler_caecum_content | EUCAMP2             | 0,5     | 1      | 64  | 16      | <=0,5 | <=1 <i>C. jejuni</i> |
| 2014 | 14-CA01092 | Broiler_caecum_content | EUCAMP2             | 0,5     | 1      | >64 | 16      | <=0,5 | <=1 <i>C. jejuni</i> |
| 2014 | 14-CA01093 | Broiler_caecum_content | EUCAMP2             | 0,5     | 1      | 16  | 0,5     | >64   | <=1 <i>C. jejuni</i> |
| 2014 | 14-CA01094 | Broiler_caecum_content | EUCAMP2             | 0,5     | 2      | 64  | 16      | <=0,5 | <=1 <i>C. jejuni</i> |
| 2014 | 14-CA01095 | Broiler_caecum_content | EUCAMP2             | 0,5     | 1      | 16  | 0,5     | >64   | <=1 <i>C. jejuni</i> |
| 2014 | 14-CA01096 | Broiler_caecum_content | EUCAMP2             | 0,25    | 1      | 64  | 8       | 64    | <=1 <i>C. jejuni</i> |
| 2014 | 14-CA01097 | Broiler_caecum_content | EUCAMP2             | 0,5     | >16    | 64  | >16     | >64   | >128 <i>C. coli</i>  |
| 2014 | 14-CA01098 | Broiler_caecum_content | EUCAMP2             | 0,5     | >16    | 64  | >16     | >64   | >128 <i>C. coli</i>  |
| 2014 | 14-CA01099 | Broiler_caecum_content | EUCAMP2             | 0,5     | >16    | 64  | >16     | 64    | >128 <i>C. coli</i>  |
| 2014 | 14-CA01100 | Broiler_caecum_content | EUCAMP2             | 0,5     | >16    | 64  | >16     | >64   | >128 <i>C. coli</i>  |
| 2014 | 14-CA01101 | Broiler_caecum_content | EUCAMP2             | 0,5     | >16    | 64  | >16     | >64   | >128 <i>C. coli</i>  |
| 2014 | 14-CA01108 | Broiler_caecum_content | EUCAMP2             | 0,5     | 1      | 8   | 0,25    | <=0,5 | <=1 <i>C. jejuni</i> |
| 2014 | 14-CA01109 | Broiler_caecum_content | EUCAMP2             | 0,5     | 2      | 4   | <=0,125 | <=0,5 | <=1 <i>C. coli</i>   |
| 2014 | 14-CA01119 | Broiler_caecum_content | EUCAMP2             | 0,5     | 1      | 64  | 16      | >64   | <=1 <i>C. jejuni</i> |
| 2014 | 14-CA01120 | Broiler_caecum_content | EUCAMP2             | 0,5     | 2      | 4   | 0,25    | <=0,5 | <=1 <i>C. jejuni</i> |
| 2014 | 14-CA01121 | Broiler_caecum_content | EUCAMP2             | <=0,125 | <=0,25 | 32  | 16      | <=0,5 | <=1 <i>C. jejuni</i> |
| 2014 | 14-CA01122 | Broiler_caecum_content | EUCAMP2             | 1       | 2      | 4   | <=0,125 | >64   | <=1 <i>C. coli</i>   |
| 2014 | 14-CA01123 | Broiler_caecum_content | EUCAMP2             | 0,5     | 2      | 8   | 0,25    | <=0,5 | <=1 <i>C. jejuni</i> |
| 2014 | 14-CA01124 | Broiler_caecum_content | EUCAMP2             | 0,25    | 2      | 64  | >16     | >64   | <=1 <i>C. coli</i>   |
| 2014 | 14-CA01159 | Broiler_caecum_content | EUCAMP2             | 0,5     | 1      | 4   | 16      | <=0,5 | <=1 <i>C. jejuni</i> |
| 2014 | 14-CA01160 | Broiler_caecum_content | EUCAMP2             | 0,5     | 1      | 64  | 16      | <=0,5 | <=1 <i>C. jejuni</i> |
| 2014 | 14-CA01161 | Broiler_caecum_content | EUCAMP2             | 1       | 2      | 4   | <=0,125 | >64   | <=1 <i>C. coli</i>   |
| 2014 | 14-CA01162 | Broiler_caecum_content | EUCAMP2             | 0,5     | 1      | 32  | 16      | 64    | <=1 <i>C. jejuni</i> |
| 2014 | 14-CA01163 | Broiler_caecum_content | EUCAMP2             | 0,5     | 2      | 64  | 16      | 64    | <=1 <i>C. jejuni</i> |
| 2014 | 14-CA01164 | Broiler_caecum_content | EUCAMP2             | 0,5     | 2      | 64  | 16      | 64    | 2 <i>C. coli</i>     |
| 2014 | 14-CA01165 | Turkey_caecum_content  | EUCAMP2             | 0,5     | 2      | >64 | >16     | <=0,5 | 2 <i>C. jejuni</i>   |

Table S5: Minimum inhibitory concentrations of 6 antimicrobials for isolats of *C. jejuni* and *C. coli* from poultry

| Year | Sample No. | Matrix_final           | Antimicrobial panel | GEN     | STR    | NAL | CIP     | TET   | ERY Species          |
|------|------------|------------------------|---------------------|---------|--------|-----|---------|-------|----------------------|
| 2014 | 14-CA01166 | Turkey_caecum_content  | EUCAMP2             | 0,5     | 2      | >64 | >16     | >64   | 2 <i>C. coli</i>     |
| 2014 | 14-CA01167 | Turkey_caecum_content  | EUCAMP2             | 0,5     | 1      | 64  | 16      | <=0,5 | <=1 <i>C. jejuni</i> |
| 2014 | 14-CA01207 | Broiler_caecum_content | EUCAMP2             | 0,5     | 1      | >64 | >16     | >64   | <=1 <i>C. coli</i>   |
| 2014 | 14-CA01209 | Turkey_caecum_content  | EUCAMP2             | 0,25    | 2      | 4   | <=0,125 | <=0,5 | <=1 <i>C. jejuni</i> |
| 2014 | 14-CA01212 | Turkey_caecum_content  | EUCAMP2             | 1       | 4      | >64 | >16     | >64   | 2 <i>C. coli</i>     |
| 2014 | 14-CA01213 | Broiler_caecum_content | EUCAMP2             | 0,25    | 1      | 32  | 16      | >64   | <=1 <i>C. coli</i>   |
| 2014 | 14-CA01214 | Broiler_caecum_content | EUCAMP2             | 0,5     | 2      | 64  | 16      | 64    | <=1 <i>C. coli</i>   |
| 2014 | 14-CA01216 | Turkey_caecum_content  | EUCAMP2             | 0,5     | >16    | >64 | >16     | 64    | >128 <i>C. coli</i>  |
| 2014 | 14-CA01220 | Turkey_caecum_content  | EUCAMP2             | 0,25    | 0,5    | 32  | 16      | 32    | <=1 <i>C. jejuni</i> |
| 2014 | 14-CA01221 | Turkey_caecum_content  | EUCAMP2             | 0,5     | 2      | 4   | 0,25    | <=0,5 | <=1 <i>C. jejuni</i> |
| 2014 | 14-CA01227 | Turkey_caecum_content  | EUCAMP2             | 0,5     | 2      | 64  | 16      | <=0,5 | <=1 <i>C. jejuni</i> |
| 2014 | 14-CA01232 | Broiler_caecum_content | EUCAMP2             | 0,5     | 2      | 4   | <=0,125 | <=0,5 | <=1 <i>C. coli</i>   |
| 2014 | 14-CA01236 | Turkey_caecum_content  | EUCAMP2             | 0,5     | >16    | 64  | 16      | 64    | <=1 <i>C. coli</i>   |
| 2014 | 14-CA01246 | Turkey_caecum_content  | EUCAMP2             | 0,5     | >16    | 64  | >16     | 64    | <=1 <i>C. coli</i>   |
| 2014 | 14-CA01248 | Broiler_caecum_content | EUCAMP2             | 0,5     | 1      | 64  | 16      | <=0,5 | <=1 <i>C. coli</i>   |
| 2014 | 14-CA01249 | Broiler_caecum_content | EUCAMP2             | 0,5     | 2      | >64 | 16      | 64    | <=1 <i>C. coli</i>   |
| 2014 | 14-CA01250 | Turkey_caecum_content  | EUCAMP2             | 0,5     | 2      | 64  | 8       | <=0,5 | <=1 <i>C. coli</i>   |
| 2014 | 14-CA01251 | Turkey_caecum_content  | EUCAMP2             | 0,25    | 0,5    | 32  | 16      | <=0,5 | <=1 <i>C. coli</i>   |
| 2014 | 14-CA01252 | Turkey_caecum_content  | EUCAMP2             | 0,5     | 2      | 4   | <=0,125 | <=0,5 | <=1 <i>C. jejuni</i> |
| 2014 | 14-CA01259 | Turkey_caecum_content  | EUCAMP2             | 0,25    | 1      | 32  | 8       | 32    | <=1 <i>C. coli</i>   |
| 2014 | 14-CA01278 | Turkey_caecum_content  | EUCAMP2             | 0,5     | 1      | >64 | 16      | <=0,5 | <=1 <i>C. jejuni</i> |
| 2014 | 14-CA01279 | Broiler_caecum_content | EUCAMP2             | 0,5     | 2      | 64  | >16     | <=0,5 | <=1 <i>C. coli</i>   |
| 2014 | 14-CA01280 | Turkey_caecum_content  | EUCAMP2             | 0,25    | 1      | 4   | <=0,125 | <=0,5 | <=1 <i>C. jejuni</i> |
| 2014 | 14-CA01281 | Broiler_caecum_content | EUCAMP2             | 0,25    | 1      | 64  | 16      | <=0,5 | <=1 <i>C. coli</i>   |
| 2014 | 14-CA01310 | Broiler_caecum_content | EUCAMP2             | 0,5     | 4      | 64  | 16      | 64    | <=1 <i>C. coli</i>   |
| 2014 | 14-CA01311 | Turkey_caecum_content  | EUCAMP2             | 0,25    | 0,5    | 64  | >16     | 8     | <=1 <i>C. jejuni</i> |
| 2014 | 14-CA01312 | Turkey_caecum_content  | EUCAMP2             | 0,5     | 1      | 8   | 0,25    | <=0,5 | <=1 <i>C. jejuni</i> |
| 2014 | 14-CA01319 | Turkey_caecum_content  | EUCAMP2             | 0,5     | 2      | 64  | >16     | <=0,5 | <=1 <i>C. coli</i>   |
| 2014 | 14-CA01320 | Turkey_caecum_content  | EUCAMP2             | <=0,125 | <=0,25 | 4   | <=0,125 | <=0,5 | <=1 <i>C. jejuni</i> |
| 2014 | 14-CA01321 | Turkey_caecum_content  | EUCAMP2             | 0,5     | 2      | 8   | 0,5     | 64    | 2 <i>C. coli</i>     |
| 2014 | 14-CA01323 | Turkey_caecum_content  | EUCAMP2             | <=0,125 | 1      | 4   | <=0,125 | <=0,5 | <=1 <i>C. jejuni</i> |
| 2014 | 14-CA01324 | Turkey_caecum_content  | EUCAMP2             | 0,5     | 1      | 64  | >16     | 64    | >128 <i>C. coli</i>  |

Table S5: Minimum inhibitory concentrations of 6 antimicrobials for isolats of *C. jejuni* and *C. coli* from poultry

| Year | Sample No. | Matrix_final           | Antimicrobial panel | GEN        | STR   | NAL      | CIP     | TET     | ERY Species         |
|------|------------|------------------------|---------------------|------------|-------|----------|---------|---------|---------------------|
| 2014 | 14-CA01325 | Turkey_caecum_content  | EUCAMP2             | 0,5        | >16   | 64       | >16     | 64      | 4 <i>C. coli</i>    |
| 2014 | 14-CA01326 | Turkey_caecum_content  | EUCAMP2             | 0,5        | >16   | 64       | >16     | 64      | 4 <i>C. coli</i>    |
| 2014 | 14-CA01327 | Turkey_caecum_content  | EUCAMP2             | 0,25       | 2     | 64 >16   |         | 64 ≤1   | <i>C. coli</i>      |
| 2014 | 14-CA01328 | Turkey_caecum_content  | EUCAMP2             | 0,25       | 0,5   | 32       | 16      | 32 ≤1   | <i>C. jejuni</i>    |
| 2014 | 14-CA01329 | Turkey_caecum_content  | EUCAMP2             | 0,5        | 1     | >64      | >16     | >64     | ≤1 <i>C. jejuni</i> |
| 2014 | 14-CA01330 | Broiler_caecum_content | EUCAMP2             | 0,25       | 1     | 64       | 16 ≤0,5 | ≤1      | <i>C. jejuni</i>    |
| 2014 | 14-CA01331 | Turkey_caecum_content  | EUCAMP2             | 0,5        | 1     | >64      | >16     | ≤0,5    | 2 <i>C. coli</i>    |
| 2014 | 14-CA01332 | Turkey_caecum_content  | EUCAMP2             | 0,5        | 1     | 64       | 16      | 64      | ≤1 <i>C. coli</i>   |
| 2014 | 14-CA01333 | Turkey_caecum_content  | EUCAMP2             | ≤0,125     | 0,5   | 8        | 8       | 32 >128 | <i>C. coli</i>      |
| 2014 | 14-CA01334 | Turkey_caecum_content  | EUCAMP2             | 0,25 >16   | >64   | >16      | >64     | >128    | <i>C. coli</i>      |
| 2014 | 14-CA01335 | Turkey_caecum_content  | EUCAMP2             | 0,25       | 1     | 64 >16   |         | 64      | 2 <i>C. coli</i>    |
| 2014 | 14-CA01336 | Turkey_caecum_content  | EUCAMP2             | 0,25       | 1     | 2 ≤0,125 | ≤0,5    | ≤1      | <i>C. jejuni</i>    |
| 2014 | 14-CA01337 | Turkey_caecum_content  | EUCAMP2             | 0,25 ≤0,25 |       | 32       | 16      | 32 ≤1   | <i>C. jejuni</i>    |
| 2014 | 14-CA01338 | Turkey_caecum_content  | EUCAMP2             | 0,5        | 2     | 64       | 16      | 64      | ≤1 <i>C. coli</i>   |
| 2014 | 14-CA01339 | Turkey_caecum_content  | EUCAMP2             | 0,5        | 2     | >64      | >16     | 64      | ≤1 <i>C. coli</i>   |
| 2014 | 14-CA01340 | Turkey_caecum_content  | EUCAMP2             | 0,5        | 2     | 64       | 16      | 64      | ≤1 <i>C. coli</i>   |
| 2014 | 14-CA01341 | Turkey_caecum_content  | EUCAMP2             | 0,5        | 1     | 4 ≤0,125 |         | ≤0,5    | ≤1 <i>C. jejuni</i> |
| 2014 | 14-CA01342 | Turkey_caecum_content  | EUCAMP2             | 0,25       | 1     | 64 >16   |         | 64 >128 | <i>C. coli</i>      |
| 2014 | 14-CA01343 | Broiler_caecum_content | EUCAMP2             | 0,5        | 2     | 64       | >16     | >64     | ≤1 <i>C. coli</i>   |
| 2014 | 14-CA01344 | Turkey_caecum_content  | EUCAMP2             | 0,25       | 1     | 64 >16   | >64     | ≤1      | <i>C. coli</i>      |
| 2014 | 14-CA01345 | Turkey_caecum_content  | EUCAMP2             | 0,5        | 2     | 32       | 8       | 32      | ≤1 <i>C. coli</i>   |
| 2014 | 14-CA01346 | Turkey_caecum_content  | EUCAMP2             | 0,5        | 2     | 64       | >16     | >64     | ≤1 <i>C. coli</i>   |
| 2014 | 14-CA01347 | Turkey_caecum_content  | EUCAMP2             | 0,25       | 1     | 64 >16   |         | 64 >128 | <i>C. coli</i>      |
| 2014 | 14-CA01348 | Turkey_caecum_content  | EUCAMP2             | 0,5        | 2     | 64       | 16      | 32      | ≤1 <i>C. coli</i>   |
| 2014 | 14-CA01349 | Turkey_caecum_content  | EUCAMP2             | 0,5        | 1     | 64       | 16      | >64     | >128 <i>C. coli</i> |
| 2014 | 14-CA01350 | Broiler_caecum_content | EUCAMP2             | 0,5        | 1     | 64       | 16      | >64     | ≤1 <i>C. jejuni</i> |
| 2014 | 14-CA01351 | Broiler_caecum_content | EUCAMP2             | 0,5        | 1     | 8        | 0,25    | ≤0,5    | ≤1 <i>C. jejuni</i> |
| 2014 | 14-CA01352 | Broiler_caecum_content | EUCAMP2             | 0,25       | 1     | 64       | 16 ≤0,5 | ≤1      | <i>C. jejuni</i>    |
| 2014 | 14-CA01353 | Broiler_caecum_content | EUCAMP2             | 0,5        | 2     | 64       | 16      | ≤0,5    | ≤1 <i>C. jejuni</i> |
| 2014 | 14-CA01354 | Broiler_caecum_content | EUCAMP2             | ≤0,125     | ≤0,25 | 64       | 16 >64  | ≤1      | <i>C. jejuni</i>    |
| 2014 | 14-CA01355 | Turkey_caecum_content  | EUCAMP2             | 1          | 2     | 64       | 16      | 64 ≤1   | <i>C. coli</i>      |
| 2014 | 14-CA01375 | Turkey_caecum_content  | EUCAMP2             | 0,5        | 1     | 4 ≤0,125 |         | ≤0,5    | ≤1 <i>C. jejuni</i> |

Table S5: Minimum inhibitory concentrations of 6 antimicrobials for isolats of *C. jejuni* and *C. coli* from poultry

| Year | Sample No. | Matrix_final           | Antimicrobial panel | GEN     | STR    | NAL | CIP     | TET   | ERY  | Species          |
|------|------------|------------------------|---------------------|---------|--------|-----|---------|-------|------|------------------|
| 2014 | 14-CA01383 | Broiler_caecum_content | EUCAMP2             | 0,5     | 1      | 64  | 16      | >64   | <=1  | <i>C. jejuni</i> |
| 2014 | 14-CA01394 | Broiler_caecum_content | EUCAMP2             | 0,25    | <=0,25 | 4   | <=0,125 | <=0,5 | <=1  | <i>C. jejuni</i> |
| 2014 | 14-CA01395 | Broiler_caecum_content | EUCAMP2             | <=0,125 | <=0,25 | 4   | <=0,125 | <=0,5 | <=1  | <i>C. jejuni</i> |
| 2014 | 14-CA01411 | Broiler_caecum_content | EUCAMP2             | 0,5     | 2      | 2   | 0,25    | >64   | <=1  | <i>C. jejuni</i> |
| 2014 | 14-CA01423 | Turkey_caecum_content  | EUCAMP2             | 0,5     | 2      | >64 | 16      | 4     | <=1  | <i>C. jejuni</i> |
| 2014 | 14-CA01424 | Turkey_caecum_content  | EUCAMP2             | 0,25    | >16    | >64 | >16     | <=0,5 | <=1  | <i>C. jejuni</i> |
| 2014 | 14-CA01425 | Turkey_caecum_content  | EUCAMP2             | 0,5     | 2      | 64  | >16     | 64    | >128 | <i>C. coli</i>   |
| 2014 | 14-CA01426 | Turkey_caecum_content  | EUCAMP2             | 1       | 2      | >64 | >16     | >64   | <=1  | <i>C. coli</i>   |
| 2014 | 14-CA01427 | Broiler_caecum_content | EUCAMP2             | 0,25    | 2      | 2   | <=0,125 | <=0,5 | <=1  | <i>C. jejuni</i> |
| 2014 | 14-CA01428 | Broiler_caecum_content | EUCAMP2             | <=0,125 | <=0,25 | 32  | 8       | 32    | <=1  | <i>C. jejuni</i> |
| 2014 | 14-CA01429 | Broiler_caecum_content | EUCAMP2             | 0,5     | 2      | 32  | >16     | >64   | <=1  | <i>C. jejuni</i> |
| 2014 | 14-CA01430 | Turkey_caecum_content  | EUCAMP2             | 1       | 2      | 4   | 0,25    | <=0,5 | <=1  | <i>C. jejuni</i> |
| 2014 | 14-CA01431 | Turkey_caecum_content  | EUCAMP2             | 0,5     | 2      | 8   | 0,5     | <=0,5 | <=1  | <i>C. coli</i>   |
| 2014 | 14-CA01432 | Broiler_caecum_content | EUCAMP2             | 0,5     | 2      | >64 | >16     | >64   | <=1  | <i>C. coli</i>   |
| 2014 | 14-CA01433 | Broiler_caecum_content | EUCAMP2             | 0,5     | 1      | 64  | 16      | 32    | <=1  | <i>C. jejuni</i> |
| 2014 | 14-CA01434 | Broiler_caecum_content | EUCAMP2             | 0,25    | 1      | 2   | <=0,125 | <=0,5 | <=1  | <i>C. jejuni</i> |
| 2014 | 14-CA01435 | Broiler_caecum_content | EUCAMP2             | 0,25    | 1      | 32  | 16      | 32    | <=1  | <i>C. jejuni</i> |
| 2014 | 14-CA01436 | Turkey_caecum_content  | EUCAMP2             | 1       | 4      | >64 | >16     | <=0,5 | <=1  | <i>C. coli</i>   |
| 2014 | 14-CA01437 | Turkey_caecum_content  | EUCAMP2             | 0,5     | 2      | >64 | >16     | >64   | <=1  | <i>C. coli</i>   |
| 2014 | 14-CA01438 | Turkey_caecum_content  | EUCAMP2             | 0,5     | 2      | >64 | >16     | >64   | <=1  | <i>C. coli</i>   |
| 2014 | 14-CA01439 | Turkey_caecum_content  | EUCAMP2             | 0,5     | 2      | 64  | >16     | 64    | >128 | <i>C. coli</i>   |
| 2014 | 14-CA01440 | Turkey_caecum_content  | EUCAMP2             | 1       | >16    | 4   | 0,25    | 16    | >128 | <i>C. coli</i>   |
| 2014 | 14-CA01441 | Turkey_caecum_content  | EUCAMP2             | 0,5     | 1      | 4   | <=0,125 | <=0,5 | <=1  | <i>C. jejuni</i> |
| 2014 | 14-CA01442 | Turkey_caecum_content  | EUCAMP2             | 1       | 1      | 4   | <=0,125 | <=0,5 | <=1  | <i>C. jejuni</i> |
| 2014 | 14-CA01443 | Turkey_caecum_content  | EUCAMP2             | 0,5     | 2      | 64  | >16     | >64   | <=1  | <i>C. jejuni</i> |
| 2014 | 14-CA01444 | Turkey_caecum_content  | EUCAMP2             | 0,5     | 1      | >64 | >16     | <=0,5 | <=1  | <i>C. jejuni</i> |
| 2014 | 14-CA01445 | Broiler_caecum_content | EUCAMP2             | 1       | 2      | 64  | >16     | >64   | <=1  | <i>C. coli</i>   |
| 2014 | 14-CA01446 | Broiler_caecum_content | EUCAMP2             | <=0,125 | 0,5    | 32  | >16     | >64   | <=1  | <i>C. jejuni</i> |
| 2014 | 14-CA01447 | Broiler_caecum_content | EUCAMP2             | 0,25    | 1      | 2   | 16      | <=0,5 | <=1  | <i>C. jejuni</i> |
| 2014 | 14-CA01448 | Broiler_caecum_content | EUCAMP2             | 0,5     | 1      | 4   | <=0,125 | <=0,5 | <=1  | <i>C. jejuni</i> |
| 2014 | 14-CA01449 | Broiler_caecum_content | EUCAMP2             | 0,25    | 1      | 32  | 16      | 32    | <=1  | <i>C. jejuni</i> |
| 2014 | 14-CA01450 | Broiler_caecum_content | EUCAMP2             | 0,25    | 1      | 2   | <=0,125 | <=0,5 | <=1  | <i>C. jejuni</i> |

Table S5: Minimum inhibitory concentrations of 6 antimicrobials for isolats of *C. jejuni* and *C. coli* from poultry

| Year | Sample No. | Matrix_final           | Antimicrobial panel | GEN     | STR    | NAL | CIP     | TET   | ERY  | Species          |
|------|------------|------------------------|---------------------|---------|--------|-----|---------|-------|------|------------------|
| 2014 | 14-CA01451 | Broiler_caecum_content | EUCAMP2             | 0,5     | 0,5    | 64  | >16     | >64   | >128 | <i>C. coli</i>   |
| 2014 | 14-CA01452 | Broiler_caecum_content | EUCAMP2             | 0,5     | 1      | 4   | <=0,125 | 64    | <=1  | <i>C. jejuni</i> |
| 2014 | 14-CA01453 | Broiler_caecum_content | EUCAMP2             | 0,25    | 0,5    | 64  | >16     | >64   | <=1  | <i>C. jejuni</i> |
| 2014 | 14-CA01454 | Turkey_caecum_content  | EUCAMP2             | 0,5     | 2      | >64 | >16     | 64    | >128 | <i>C. coli</i>   |
| 2014 | 14-CA01455 | Turkey_caecum_content  | EUCAMP2             | <=0,125 | <=0,25 | 32  | 16      | 64    | <=1  | <i>C. jejuni</i> |
| 2014 | 14-CA01456 | Turkey_caecum_content  | EUCAMP2             | 0,25    | >16    | 32  | 16      | 32    | 2    | <i>C. coli</i>   |
| 2014 | 14-CA01457 | Turkey_caecum_content  | EUCAMP2             | 0,5     | 2      | 64  | >16     | >64   | 2    | <i>C. coli</i>   |
| 2014 | 14-CA01458 | Broiler_caecum_content | EUCAMP2             | 0,25    | 1      | 64  | >16     | >64   | <=1  | <i>C. jejuni</i> |
| 2014 | 14-CA01459 | Broiler_caecum_content | EUCAMP2             | 0,5     | 0,5    | 64  | 16      | <=0,5 | <=1  | <i>C. jejuni</i> |
| 2014 | 14-CA01460 | Broiler_caecum_content | EUCAMP2             | 0,5     | 2      | >64 | >16     | >64   | 2    | <i>C. coli</i>   |
| 2014 | 14-CA01461 | Broiler_caecum_content | EUCAMP2             | 0,5     | 2      | 64  | 8       | <=0,5 | <=1  | <i>C. jejuni</i> |
| 2014 | 14-CA01462 | Broiler_caecum_content | EUCAMP2             | 1       | 2      | >64 | 16      | <=0,5 | <=1  | <i>C. jejuni</i> |
| 2014 | 14-CA01463 | Broiler_caecum_content | EUCAMP2             | 0,5     | 2      | 2   | >16     | 8     | <=1  | <i>C. jejuni</i> |
| 2014 | 14-CA01464 | Broiler_caecum_content | EUCAMP2             | 0,25    | 1      | 4   | <=0,125 | <=0,5 | <=1  | <i>C. jejuni</i> |
| 2014 | 14-CA01465 | Turkey_caecum_content  | EUCAMP2             | 0,5     | 1      | 64  | 16      | 64    | <=1  | <i>C. coli</i>   |
| 2014 | 14-CA01466 | Turkey_caecum_content  | EUCAMP2             | 0,25    | 1      | 64  | >16     | >64   | <=1  | <i>C. coli</i>   |
| 2014 | 14-CA01467 | Turkey_caecum_content  | EUCAMP2             | 0,5     | 2      | 64  | 16      | 64    | <=1  | <i>C. coli</i>   |
| 2014 | 14-CA01468 | Turkey_caecum_content  | EUCAMP2             | 0,5     | 1      | 32  | >16     | 8     | <=1  | <i>C. jejuni</i> |
| 2014 | 14-CA01469 | Turkey_caecum_content  | EUCAMP2             | 0,5     | 2      | 64  | >16     | 64    | >128 | <i>C. coli</i>   |
| 2014 | 14-CA01470 | Turkey_caecum_content  | EUCAMP2             | 0,5     | 1      | 32  | 16      | 64    | <=1  | <i>C. jejuni</i> |
| 2014 | 14-CA01471 | Turkey_caecum_content  | EUCAMP2             | 0,5     | 1      | >64 | >16     | 64    | <=1  | <i>C. coli</i>   |
| 2014 | 14-CA01472 | Turkey_caecum_content  | EUCAMP2             | 0,5     | 2      | 64  | >16     | 64    | >128 | <i>C. coli</i>   |
| 2014 | 14-CA01473 | Broiler_caecum_content | EUCAMP2             | 0,25    | 1      | 4   | <=0,125 | <=0,5 | <=1  | <i>C. jejuni</i> |
| 2014 | 14-CA01474 | Broiler_caecum_content | EUCAMP2             | 0,25    | 1      | 4   | <=0,125 | <=0,5 | <=1  | <i>C. jejuni</i> |
| 2014 | 14-CA01475 | Broiler_caecum_content | EUCAMP2             | 0,25    | 1      | 2   | 16      | 4     | <=1  | <i>C. jejuni</i> |
| 2014 | 14-CA01476 | Broiler_caecum_content | EUCAMP2             | <=0,125 | <=0,25 | 32  | 16      | 32    | <=1  | <i>C. jejuni</i> |
| 2014 | 14-CA01477 | Broiler_caecum_content | EUCAMP2             | 0,5     | 2      | 4   | <=0,125 | <=0,5 | <=1  | <i>C. coli</i>   |
| 2014 | 14-CA01478 | Broiler_caecum_content | EUCAMP2             | <=0,125 | <=0,25 | 32  | >16     | >64   | >128 | <i>C. jejuni</i> |
| 2014 | 14-CA01479 | Turkey_caecum_content  | EUCAMP2             | 0,25    | 0,5    | 2   | <=0,125 | 64    | <=1  | <i>C. jejuni</i> |
| 2014 | 14-CA01480 | Turkey_caecum_content  | EUCAMP2             | 0,25    | 1      | 32  | 16      | 64    | >128 | <i>C. coli</i>   |
| 2014 | 14-CA01481 | Turkey_caecum_content  | EUCAMP2             | 1       | 4      | 64  | 16      | 64    | <=1  | <i>C. coli</i>   |
| 2014 | 14-CA01482 | Turkey_caecum_content  | EUCAMP2             | 0,5     | 2      | >64 | >16     | >64   | <=1  | <i>C. coli</i>   |

Table S5: Minimum inhibitory concentrations of 6 antimicrobials for isolats of *C. jejuni* and *C. coli* from poultry

| Year | Sample No. | Matrix_final           | Antimicrobial panel | GEN     | STR | NAL | CIP     | TET   | ERY  | Species          |
|------|------------|------------------------|---------------------|---------|-----|-----|---------|-------|------|------------------|
| 2014 | 14-CA01483 | Turkey_caecum_content  | EUCAMP2             | 0,5     | 1   | 64  | 16      | 64    | <=1  | <i>C. coli</i>   |
| 2014 | 14-CA01484 | Turkey_caecum_content  | EUCAMP2             | 0,5     | 2   | >64 | >16     | 64    | <=1  | <i>C. coli</i>   |
| 2014 | 14-CA01485 | Turkey_caecum_content  | EUCAMP2             | 0,5     | 2   | 4   | <=0,125 | <=0,5 | <=1  | <i>C. jejuni</i> |
| 2014 | 14-CA01486 | Turkey_caecum_content  | EUCAMP2             | 0,5     | >16 | 64  | >16     | 64    | >128 | <i>C. coli</i>   |
| 2014 | 14-CA01487 | Turkey_caecum_content  | EUCAMP2             | <=0,125 | 1   | 16  | 8       | 32    | >128 | <i>C. coli</i>   |
| 2014 | 14-CA01488 | Turkey_caecum_content  | EUCAMP2             | 0,5     | 1   | 64  | >16     | >64   | >128 | <i>C. coli</i>   |
| 2014 | 14-CA01489 | Turkey_caecum_content  | EUCAMP2             | 0,25    | 0,5 | 4   | <=0,125 | <=0,5 | <=1  | <i>C. jejuni</i> |
| 2014 | 14-CA01490 | Turkey_caecum_content  | EUCAMP2             | 0,5     | 1   | 64  | >16     | 64    | >128 | <i>C. coli</i>   |
| 2014 | 14-CA01491 | Turkey_caecum_content  | EUCAMP2             | 0,25    | 2   | 64  | >16     | 64    | >128 | <i>C. coli</i>   |
| 2014 | 14-CA01492 | Broiler_caecum_content | EUCAMP2             | 0,5     | 1   | 4   | <=0,125 | <=0,5 | <=1  | <i>C. jejuni</i> |
| 2014 | 14-CA01493 | Broiler_caecum_content | EUCAMP2             | 0,25    | 0,5 | 64  | 16      | 64    | <=1  | <i>C. jejuni</i> |
| 2014 | 14-CA01494 | Broiler_caecum_content | EUCAMP2             | 0,5     | >16 | >64 | >16     | >64   | >128 | <i>C. coli</i>   |
| 2014 | 14-CA01495 | Broiler_caecum_content | EUCAMP2             | 1       | 2   | 64  | >16     | >64   | <=1  | <i>C. coli</i>   |
| 2014 | 14-CA01496 | Broiler_caecum_content | EUCAMP2             | 1       | 2   | 64  | 16      | >64   | <=1  | <i>C. jejuni</i> |
| 2014 | 14-CA01497 | Broiler_caecum_content | EUCAMP2             | 0,5     | 2   | 8   | 0,25    | <=0,5 | <=1  | <i>C. jejuni</i> |
| 2014 | 14-CA01498 | Broiler_caecum_content | EUCAMP2             | 0,5     | 0,5 | >64 | >16     | <=0,5 | <=1  | <i>C. jejuni</i> |
| 2014 | 14-CA01499 | Broiler_caecum_content | EUCAMP2             | 0,5     | 0,5 | 64  | 16      | >64   | >128 | <i>C. coli</i>   |
| 2014 | 14-CA01500 | Broiler_caecum_content | EUCAMP2             | 0,25    | 0,5 | 64  | >16     | >64   | 4    | <i>C. jejuni</i> |
| 2014 | 14-CA01501 | Turkey_caecum_content  | EUCAMP2             | 0,5     | >16 | 64  | >16     | 64    | >128 | <i>C. coli</i>   |
| 2014 | 14-CA01502 | Turkey_caecum_content  | EUCAMP2             | 0,25    | 0,5 | 64  | 16      | 32    | <=1  | <i>C. jejuni</i> |
| 2014 | 14-CA01503 | Turkey_caecum_content  | EUCAMP2             | 0,5     | 1   | >64 | >16     | <=0,5 | 2    | <i>C. jejuni</i> |
| 2014 | 14-CA01504 | Turkey_caecum_content  | EUCAMP2             | 1       | 2   | 32  | 8       | >64   | <=1  | <i>C. coli</i>   |
| 2014 | 14-CA01505 | Turkey_caecum_content  | EUCAMP2             | 0,5     | 2   | 64  | >16     | >64   | 2    | <i>C. coli</i>   |
| 2014 | 14-CA01506 | Turkey_caecum_content  | EUCAMP2             | 1       | 4   | >64 | >16     | >64   | 4    | <i>C. coli</i>   |
| 2014 | 14-CA01507 | Broiler_caecum_content | EUCAMP2             | 0,5     | >16 | 64  | >16     | 64    | >128 | <i>C. coli</i>   |
| 2014 | 14-CA01508 | Turkey_caecum_content  | EUCAMP2             | 0,25    | >16 | 16  | 16      | 32    | <=1  | <i>C. coli</i>   |
| 2014 | 14-CA01509 | Turkey_caecum_content  | EUCAMP2             | 0,5     | 2   | 8   | 0,25    | <=0,5 | <=1  | <i>C. jejuni</i> |
| 2014 | 14-CA01510 | Turkey_caecum_content  | EUCAMP2             | 0,5     | >16 | 64  | >16     | 64    | >128 | <i>C. coli</i>   |
| 2014 | 14-CA01511 | Turkey_caecum_content  | EUCAMP2             | 0,25    | 0,5 | 16  | 8       | 32    | <=1  | <i>C. coli</i>   |
| 2014 | 14-CA01512 | Turkey_caecum_content  | EUCAMP2             | 0,5     | 2   | 64  | >16     | 64    | >128 | <i>C. coli</i>   |
| 2014 | 14-CA01513 | Broiler_caecum_content | EUCAMP2             | 0,5     | 1   | <=1 | 16      | 8     | <=1  | <i>C. jejuni</i> |
| 2014 | 14-CA01514 | Broiler_caecum_content | EUCAMP2             | 0,5     | 1   | 64  | >16     | 32    | >128 | <i>C. coli</i>   |



Table S5: Minimum inhibitory concentrations of 6 antimicrobials for isolats of *C. jejuni* and *C. coli* from poultry

| Year | Sample No. | Matrix_final           | Antimicrobial panel | GEN      | STR     | NAL    | CIP     | TET     | ERY Species          |
|------|------------|------------------------|---------------------|----------|---------|--------|---------|---------|----------------------|
| 2014 | 14-CA01515 | Broiler_caecum_content | EUCAMP2             | 0,5      | 2       | 4      | 0,25    | <=0,5   | <=1 <i>C. jejuni</i> |
| 2014 | 14-CA01516 | Broiler_caecum_content | EUCAMP2             | 1        | 2 >64   | >16    | >64     |         | 2 <i>C. coli</i>     |
| 2014 | 14-CA01517 | Broiler_caecum_content | EUCAMP2             | 0,5      | 2       | >64    | >16     | >64     | 2 <i>C. coli</i>     |
| 2014 | 14-CA01518 | Broiler_caecum_content | EUCAMP2             | 0,5      | 2       | 64     | 16      | 64      | <=1 <i>C. coli</i>   |
| 2014 | 14-CA01519 | Turkey_caecum_content  | EUCAMP2             | 0,25     | 1       | 8      | 0,5     | 32 <=1  | <i>C. jejuni</i>     |
| 2014 | 14-CA01520 | Turkey_caecum_content  | EUCAMP2             | 0,5      | 1       | 64     | >16     | 64      | <=1 <i>C. coli</i>   |
| 2014 | 14-CA01521 | Turkey_caecum_content  | EUCAMP2             | 1        | 4 >64   |        | 16 >64  | <=1     | <i>C. coli</i>       |
| 2014 | 14-CA01522 | Turkey_caecum_content  | EUCAMP2             | 0,5      | 2       | 8      | 0,25    | 64      | <=1 <i>C. coli</i>   |
| 2014 | 14-CA01523 | Turkey_caecum_content  | EUCAMP2             | 0,5      | 2       | 64     | >16     | 64      | >128 <i>C. coli</i>  |
| 2014 | 14-CA01524 | Turkey_caecum_content  | EUCAMP2             | 0,25 >16 |         | 64     | 16      | 64 >128 | <i>C. coli</i>       |
| 2014 | 14-CA01525 | Turkey_caecum_content  | EUCAMP2             | 0,5      | 1       | >64    | 16      | >64     | <=1 <i>C. jejuni</i> |
| 2014 | 14-CA01526 | Turkey_caecum_content  | EUCAMP2             | 0,5      | 1       | 64     | 16      | 64      | <=1 <i>C. jejuni</i> |
| 2014 | 14-CA01527 | Turkey_caecum_content  | EUCAMP2             | 0,5      | >16     | 64     | 16      | 64      | >128 <i>C. coli</i>  |
| 2014 | 14-CA01528 | Turkey_caecum_content  | EUCAMP2             | 0,5      | 2       | 64     | 16      | 64      | <=1 <i>C. coli</i>   |
| 2014 | 14-CA01529 | Turkey_caecum_content  | EUCAMP2             | 0,5      | 2       | 32     | 8       | 64      | 128 <i>C. coli</i>   |
| 2014 | 14-CA01530 | Turkey_caecum_content  | EUCAMP2             | 0,5      | 1       | 64     | 8       | <=0,5   | <=1 <i>C. coli</i>   |
| 2014 | 14-CA01531 | Turkey_caecum_content  | EUCAMP2             | 0,5      | 1       | 64     | >16     | 64      | >128 <i>C. coli</i>  |
| 2014 | 14-CA01532 | Broiler_caecum_content | EUCAMP2             | 0,5      | 1       | 4      | <=0,125 | <=0,5   | <=1 <i>C. jejuni</i> |
| 2014 | 14-CA01533 | Broiler_caecum_content | EUCAMP2             | 0,5      | 2       | 64     | 8       | <=0,5   | <=1 <i>C. jejuni</i> |
| 2014 | 14-CA01534 | Turkey_caecum_content  | EUCAMP2             | 0,5      | 1       | 64     | >16     | 64      | <=1 <i>C. coli</i>   |
| 2014 | 14-CA01535 | Broiler_caecum_content | EUCAMP2             | 1        | 4       | 64     | 16      | 64 <=1  | <i>C. coli</i>       |
| 2014 | 14-CA01536 | Broiler_caecum_content | EUCAMP2             | 0,5      | 2       | 64     | >16     | 64      | >128 <i>C. coli</i>  |
| 2014 | 14-CA01541 | Turkey_caecum_content  | EUCAMP2             | 0,5      | 2       | 64     | 16      | <=0,5   | <=1 <i>C. jejuni</i> |
| 2014 | 14-CA01542 | Broiler_caecum_content | EUCAMP2             | 0,25     | 0,5     | 64 >16 | >64     | <=1     | <i>C. coli</i>       |
| 2014 | 14-CA01555 | Turkey_caecum_content  | EUCAMP2             | 0,5      | 2       | >64    | >16     | 64      | <=1 <i>C. coli</i>   |
| 2014 | 14-CA01556 | Turkey_caecum_content  | EUCAMP2             | <=0,125  | 0,5     | 64 >16 | >64     | <=1     | <i>C. jejuni</i>     |
| 2014 | 14-CA01557 | Turkey_caecum_content  | EUCAMP2             | 0,5      | 1       | 16     | 8       | 16      | <=1 <i>C. coli</i>   |
| 2014 | 14-CA01559 | Broiler_caecum_content | EUCAMP2             | 0,5      | 1       | 32     | 1       | <=0,5   | <=1 <i>C. jejuni</i> |
| 2014 | 14-CA01560 | Broiler_caecum_content | EUCAMP2             | 0,5      | 1       | 64     | 16      | <=0,5   | <=1 <i>C. jejuni</i> |
| 2014 | 14-CA01561 | Broiler_caecum_content | EUCAMP2             | 0,25     | 0,5     | 64     | 16      | 64 <=1  | <i>C. jejuni</i>     |
| 2014 | 14-CA01562 | Broiler_caecum_content | EUCAMP2             | 0,5      | 2       | 64     | 16      | <=0,5   | <=1 <i>C. coli</i>   |
| 2014 | 14-CA01563 | Broiler_caecum_content | EUCAMP2             | 0,25     | 0,5 >64 | >16    | >64     | <=1     | <i>C. jejuni</i>     |

Table S5: Minimum inhibitory concentrations of 6 antimicrobials for isolats of *C. jejuni* and *C. coli* from poultry

| Year | Sample No. | Matrix_final           | Antimicrobial panel | GEN     | STR    | NAL | CIP     | TET   | ERY  | Species          |
|------|------------|------------------------|---------------------|---------|--------|-----|---------|-------|------|------------------|
| 2014 | 14-CA01564 | Broiler_caecum_content | EUCAMP2             | 0,5     | 1      | 64  | 16      | 32    | <=1  | <i>C. jejuni</i> |
| 2014 | 14-CA01565 | Broiler_caecum_content | EUCAMP2             | 0,25    | 1      | 32  | >16     | 64    | <=1  | <i>C. jejuni</i> |
| 2014 | 14-CA01566 | Broiler_caecum_content | EUCAMP2             | 0,25    | 0,5    | 64  | >16     | >64   | <=1  | <i>C. jejuni</i> |
| 2014 | 14-CA01567 | Broiler_caecum_content | EUCAMP2             | 0,5     | 1      | 64  | 16      | <=0,5 | <=1  | <i>C. coli</i>   |
| 2014 | 14-CA01594 | Broiler_caecum_content | EUCAMP2             | 1       | 2      | 4   | <=0,125 | <=0,5 | <=1  | <i>C. coli</i>   |
| 2014 | 14-CA01610 | Broiler_caecum_content | EUCAMP2             | 0,25    | 1      | 32  | 16      | 32    | <=1  | <i>C. jejuni</i> |
| 2014 | 14-CA01622 | Broiler_caecum_content | EUCAMP2             | 1       | 2      | 64  | 16      | <=0,5 | <=1  | <i>C. jejuni</i> |
| 2014 | 14-CA01623 | Turkey_caecum_content  | EUCAMP2             | 0,5     | 1      | 64  | 16      | <=0,5 | <=1  | <i>C. jejuni</i> |
| 2014 | 14-CA01624 | Turkey_caecum_content  | EUCAMP2             | 0,5     | 2      | 64  | >16     | 64    | >128 | <i>C. coli</i>   |
| 2014 | 14-CA01625 | Turkey_caecum_content  | EUCAMP2             | 1       | 2      | 64  | 16      | >64   | <=1  | <i>C. coli</i>   |
| 2014 | 14-CA01626 | Turkey_caecum_content  | EUCAMP2             | 0,5     | 1      | >64 | >16     | >64   | <=1  | <i>C. coli</i>   |
| 2014 | 14-CA01628 | Turkey_caecum_content  | EUCAMP2             | 1       | 2      | >64 | >16     | <=0,5 | 4    | <i>C. coli</i>   |
| 2014 | 14-CA01629 | Turkey_caecum_content  | EUCAMP2             | 0,5     | 1      | 64  | 8       | <=0,5 | <=1  | <i>C. jejuni</i> |
| 2014 | 14-CA01630 | Turkey_caecum_content  | EUCAMP2             | 1       | 2      | 64  | 16      | 64    | <=1  | <i>C. coli</i>   |
| 2014 | 14-CA01631 | Broiler_caecum_content | EUCAMP2             | 0,5     | 1      | 4   | <=0,125 | 64    | <=1  | <i>C. jejuni</i> |
| 2014 | 14-CA01632 | Broiler_caecum_content | EUCAMP2             | 1       | >16    | 4   | 0,25    | <=0,5 | <=1  | <i>C. coli</i>   |
| 2014 | 14-CA01633 | Broiler_caecum_content | EUCAMP2             | 0,25    | 1      | 64  | >16     | >64   | <=1  | <i>C. jejuni</i> |
| 2014 | 14-CA01634 | Broiler_caecum_content | EUCAMP2             | 0,5     | 2      | >64 | >16     | >64   | <=1  | <i>C. coli</i>   |
| 2014 | 14-CA01635 | Broiler_caecum_content | EUCAMP2             | 0,5     | 2      | 4   | <=0,125 | <=0,5 | <=1  | <i>C. jejuni</i> |
| 2014 | 14-CA01636 | Broiler_caecum_content | EUCAMP2             | 1       | 2      | 4   | 0,25    | <=0,5 | <=1  | <i>C. jejuni</i> |
| 2014 | 14-CA01637 | Broiler_caecum_content | EUCAMP2             | <=0,125 | <=0,25 | 16  | 4       | 16    | <=1  | <i>C. jejuni</i> |
| 2014 | 14-CA01638 | Broiler_caecum_content | EUCAMP2             | 1       | 2      | >64 | 16      | <=0,5 | <=1  | <i>C. coli</i>   |
| 2014 | 14-CA01639 | Broiler_caecum_content | EUCAMP2             | 0,5     | 1      | 64  | 16      | 64    | <=1  | <i>C. jejuni</i> |
| 2014 | 14-CA01640 | Broiler_caecum_content | EUCAMP2             | <=0,125 | <=0,25 | 8   | 8       | 16    | <=1  | <i>C. jejuni</i> |
| 2014 | 14-CA01641 | Turkey_caecum_content  | EUCAMP2             | 1       | 2      | >64 | 16      | <=0,5 | <=1  | <i>C. coli</i>   |
| 2014 | 14-CA01642 | Turkey_caecum_content  | EUCAMP2             | 1       | 2      | >64 | 16      | <=0,5 | <=1  | <i>C. jejuni</i> |
| 2014 | 14-CA01643 | Turkey_caecum_content  | EUCAMP2             | 0,5     | >16    | >64 | >16     | >64   | 2    | <i>C. coli</i>   |
| 2014 | 14-CA01644 | Broiler_caecum_content | EUCAMP2             | 1       | 2      | 4   | <=0,125 | <=0,5 | <=1  | <i>C. jejuni</i> |
| 2014 | 14-CA01645 | Broiler_caecum_content | EUCAMP2             | 0,5     | 1      | 4   | <=0,125 | <=0,5 | <=1  | <i>C. jejuni</i> |
| 2014 | 14-CA01646 | Broiler_caecum_content | EUCAMP2             | 0,5     | 1      | >64 | >16     | >64   | <=1  | <i>C. jejuni</i> |
| 2014 | 14-CA01647 | Broiler_caecum_content | EUCAMP2             | 0,5     | 1      | 64  | 4       | <=0,5 | <=1  | <i>C. coli</i>   |
| 2014 | 14-CA01648 | Turkey_caecum_content  | EUCAMP2             | 0,5     | >16    | 64  | >16     | 64    | >128 | <i>C. coli</i>   |

Table S5: Minimum inhibitory concentrations of 6 antimicrobials for isolats of *C. jejuni* and *C. coli* from poultry

| Year | Sample No. | Matrix_final           | Antimicrobial panel | GEN  | STR   | NAL    | CIP     | TET   | ERY Species          |
|------|------------|------------------------|---------------------|------|-------|--------|---------|-------|----------------------|
| 2014 | 14-CA01649 | Turkey_caecum_content  | EUCAMP2             | 0,5  | 2     | <=1    | <=0,125 | 16    | <=1 <i>C. jejuni</i> |
| 2014 | 14-CA01650 | Turkey_caecum_content  | EUCAMP2             | 0,5  | 2     | >64    | >16     | >64   | 2 <i>C. coli</i>     |
| 2014 | 14-CA01651 | Turkey_caecum_content  | EUCAMP2             | 0,5  | 2     | 64     | 16      | 64    | <=1 <i>C. coli</i>   |
| 2014 | 14-CA01652 | Turkey_caecum_content  | EUCAMP2             | 0,5  | 2     | 64     | 8       | <=0,5 | <=1 <i>C. coli</i>   |
| 2014 | 14-CA01653 | Turkey_caecum_content  | EUCAMP2             | 0,5  | 1     | 64     | 16      | 64    | >128 <i>C. coli</i>  |
| 2014 | 14-CA01654 | Turkey_caecum_content  | EUCAMP2             | 0,5  | 4     | 32     | 8       | 64    | <=1 <i>C. coli</i>   |
| 2014 | 14-CA01655 | Turkey_caecum_content  | EUCAMP2             | 1    | 2     | 64 >16 | >64     | >128  | <i>C. coli</i>       |
| 2014 | 14-CA01656 | Turkey_caecum_content  | EUCAMP2             | 1    | 4     | 64     | 16      | 64    | <=1 <i>C. coli</i>   |
| 2014 | 14-CA01657 | Turkey_caecum_content  | EUCAMP2             | 0,5  | 1     | 32     | 8       | <=0,5 | <=1 <i>C. coli</i>   |
| 2014 | 14-CA01658 | Turkey_caecum_content  | EUCAMP2             | 0,5  | 1     | 32     | 8       | <=0,5 | <=1 <i>C. coli</i>   |
| 2014 | 14-CA01659 | Turkey_caecum_content  | EUCAMP2             | 1    | 4     | 64     | 16      | 64    | <=1 <i>C. coli</i>   |
| 2014 | 14-CA01660 | Turkey_caecum_content  | EUCAMP2             | 0,5  | 1     | 64     | 16      | 64    | <=1 <i>C. coli</i>   |
| 2014 | 14-CA01661 | Turkey_caecum_content  | EUCAMP2             | 0,5  | 1     | >64    | 16      | 64    | <=1 <i>C. coli</i>   |
| 2014 | 14-CA01662 | Turkey_caecum_content  | EUCAMP2             | 0,5  | 0,5   | 4      | <=0,125 | <=0,5 | <=1 <i>C. jejuni</i> |
| 2014 | 14-CA01663 | Turkey_caecum_content  | EUCAMP2             | 0,5  | 1     | 64     | 16      | >64   | >128 <i>C. coli</i>  |
| 2014 | 14-CA01664 | Turkey_caecum_content  | EUCAMP2             | 1    | 2 >64 | >16    | >64     |       | 2 <i>C. coli</i>     |
| 2014 | 14-CA01665 | Turkey_caecum_content  | EUCAMP2             | 0,5  | 1     | 64     | >16     | 32    | <=1 <i>C. jejuni</i> |
| 2014 | 14-CA01666 | Turkey_caecum_content  | EUCAMP2             | 1    | 2 >64 | >16    | >64     |       | 2 <i>C. coli</i>     |
| 2014 | 14-CA01667 | Turkey_caecum_content  | EUCAMP2             | 0,5  | 2     | 64     | >16     | >64   | >128 <i>C. coli</i>  |
| 2014 | 14-CA01668 | Turkey_caecum_content  | EUCAMP2             | 0,25 | 1     | 64 >16 | >64     | <=1   | <i>C. coli</i>       |
| 2014 | 14-CA01669 | Broiler_caecum_content | EUCAMP2             | 1    | 2     | 64     | 8       | <=0,5 | <=1 <i>C. coli</i>   |
| 2014 | 14-CA01670 | Broiler_caecum_content | EUCAMP2             | 0,5  | 1     | 4      | <=0,125 | <=0,5 | <=1 <i>C. jejuni</i> |
| 2014 | 14-CA01671 | Broiler_caecum_content | EUCAMP2             | 0,5  | 1     | 64     | 16      | 32    | <=1 <i>C. coli</i>   |
| 2014 | 14-CA01672 | Broiler_caecum_content | EUCAMP2             | 0,5  | 2     | 64     | 16      | 64    | <=1 <i>C. coli</i>   |
| 2014 | 14-CA01673 | Broiler_caecum_content | EUCAMP2             | 0,5  | 1     | 64     | 16      | 32    | <=1 <i>C. coli</i>   |
| 2014 | 14-CA01674 | Broiler_caecum_content | EUCAMP2             | 0,25 | 1     | 64     | 16      | 64    | <=1 <i>C. coli</i>   |
| 2014 | 14-CA01675 | Turkey_caecum_content  | EUCAMP2             | 0,25 | 0,5   | 64 >16 | >64     | <=1   | <i>C. coli</i>       |
| 2014 | 14-CA01677 | Turkey_caecum_content  | EUCAMP2             | 0,25 | 1     | 32     | 16      | 64    | >128 <i>C. coli</i>  |
| 2014 | 14-CA01678 | Turkey_caecum_content  | EUCAMP2             | 0,5  | 1     | 32     | 16      | 64    | >128 <i>C. coli</i>  |
| 2014 | 14-CA01679 | Turkey_caecum_content  | EUCAMP2             | 0,5  | 1     | 64     | >16     | >64   | >128 <i>C. coli</i>  |
| 2014 | 14-CA01680 | Broiler_caecum_content | EUCAMP2             | 0,5  | 2     | 64     | 16      | >64   | 2 <i>C. coli</i>     |
| 2014 | 14-CA01681 | Broiler_caecum_content | EUCAMP2             | 0,5  | 1     | 64     | 16      | >64   | <=1 <i>C. coli</i>   |

Table S5: Minimum inhibitory concentrations of 6 antimicrobials for isolats of *C. jejuni* and *C. coli* from poultry

| Year | Sample No. | Matrix_final           | Antimicrobial panel | GEN     | STR    | NAL | CIP     | TET   | ERY  | Species          |
|------|------------|------------------------|---------------------|---------|--------|-----|---------|-------|------|------------------|
| 2014 | 14-CA01682 | Broiler_caecum_content | EUCAMP2             | 1       | 4 >64  |     | 16      | <=0,5 | <=1  | <i>C. jejuni</i> |
| 2014 | 14-CA01683 | Turkey_caecum_content  | EUCAMP2             | 0,25    | 1      | 64  | 16      | 64    | <=1  | <i>C. coli</i>   |
| 2014 | 14-CA01684 | Turkey_caecum_content  | EUCAMP2             | 0,5     | 1      | 64  | 16      | 64    | <=1  | <i>C. coli</i>   |
| 2014 | 14-CA01685 | Turkey_caecum_content  | EUCAMP2             | 0,5     | 2      | 64  | 8       | 32    | <=1  | <i>C. coli</i>   |
| 2014 | 14-CA01686 | Turkey_caecum_content  | EUCAMP2             | 0,5     | 1      | 64  | 16      | >64   | <=1  | <i>C. coli</i>   |
| 2014 | 14-CA01687 | Broiler_caecum_content | EUCAMP2             | 0,5     | 2      | <=1 | 16      | 64    | <=1  | <i>C. jejuni</i> |
| 2014 | 14-CA01688 | Broiler_caecum_content | EUCAMP2             | 0,5     | 2      | <=1 | 16      | >64   | <=1  | <i>C. jejuni</i> |
| 2014 | 14-CA01689 | Turkey_caecum_content  | EUCAMP2             | 0,5     | 1      | 4   | 0,25    | >64   | <=1  | <i>C. jejuni</i> |
| 2014 | 14-CA01690 | Broiler_caecum_content | EUCAMP2             | 0,5     | 1      | >64 | 16      | <=0,5 | <=1  | <i>C. jejuni</i> |
| 2014 | 14-CA01691 | Broiler_caecum_content | EUCAMP2             | 0,5     | 2      | 4   | <=0,125 | 64    | <=1  | <i>C. coli</i>   |
| 2014 | 14-CA01695 | Turkey_caecum_content  | EUCAMP2             | 0,5     | 2      | 2   | >16     | >64   | <=1  | <i>C. jejuni</i> |
| 2014 | 14-CA01696 | Turkey_caecum_content  | EUCAMP2             | 0,5     | 4      | >64 | 16      | >64   | <=1  | <i>C. coli</i>   |
| 2014 | 14-CA01697 | Turkey_caecum_content  | EUCAMP2             | 0,5     | 1      | >64 | 16      | 64    | <=1  | <i>C. coli</i>   |
| 2014 | 14-CA01698 | Turkey_caecum_content  | EUCAMP2             | 0,5     | 1      | 64  | 16      | <=0,5 | <=1  | <i>C. coli</i>   |
| 2014 | 14-CA01699 | Turkey_caecum_content  | EUCAMP2             | 0,5     | 2      | 64  | 16      | >64   | 2    | <i>C. coli</i>   |
| 2014 | 14-CA01700 | Turkey_caecum_content  | EUCAMP2             | 0,5     | 2      | 64  | 16      | >64   | 2    | <i>C. coli</i>   |
| 2014 | 14-CA01701 | Turkey_caecum_content  | EUCAMP2             | 0,5     | 2      | 64  | 8       | 32    | <=1  | <i>C. coli</i>   |
| 2014 | 14-CA01720 | Broiler_caecum_content | EUCAMP2             | 1       | 4      | 4   | <=0,125 | 64    | <=1  | <i>C. coli</i>   |
| 2014 | 14-CA01727 | Broiler_caecum_content | EUCAMP2             | <=0,125 | <=0,25 | 2   | <=0,125 | <=0,5 | <=1  | <i>C. jejuni</i> |
| 2014 | 14-CA01733 | Turkey_caecum_content  | EUCAMP2             | 0,25    | 1      | 64  | 16      | <=0,5 | <=1  | <i>C. coli</i>   |
| 2014 | 14-CA01734 | Turkey_caecum_content  | EUCAMP2             | 0,25    | 1      | 64  | 16      | 64    | <=1  | <i>C. coli</i>   |
| 2014 | 14-CA01735 | Turkey_caecum_content  | EUCAMP2             | 0,25    | 1      | <=1 | 16      | <=0,5 | <=1  | <i>C. jejuni</i> |
| 2014 | 14-CA01736 | Turkey_caecum_content  | EUCAMP2             | 0,25    | 1      | 32  | >16     | 64    | >128 | <i>C. coli</i>   |
| 2014 | 14-CA01737 | Turkey_caecum_content  | EUCAMP2             | 0,5     | 1      | 64  | 16      | 64    | >128 | <i>C. coli</i>   |
| 2014 | 14-CA01738 | Turkey_caecum_content  | EUCAMP2             | 0,5     | 1      | 64  | 16      | 64    | <=1  | <i>C. jejuni</i> |
| 2014 | 14-CA01739 | Turkey_caecum_content  | EUCAMP2             | 0,25    | 1      | >64 | >16     | >64   | <=1  | <i>C. coli</i>   |
| 2014 | 14-CA01776 | Broiler_caecum_content | EUCAMP2             | 0,5     | 2      | 64  | >16     | >64   | <=1  | <i>C. coli</i>   |
| 2014 | 14-CA01777 | Turkey_caecum_content  | EUCAMP2             | 1       | 2      | >64 | 16      | <=0,5 | <=1  | <i>C. jejuni</i> |
| 2014 | 14-CA01778 | Turkey_caecum_content  | EUCAMP2             | 0,5     | 4      | 64  | 8       | 64    | <=1  | <i>C. coli</i>   |
| 2014 | 14-CA01779 | Turkey_caecum_content  | EUCAMP2             | 0,5     | 2      | 4   | <=0,125 | <=0,5 | <=1  | <i>C. jejuni</i> |
| 2014 | 14-CA01780 | Turkey_caecum_content  | EUCAMP2             | 0,5     | 2      | 32  | >16     | >64   | <=1  | <i>C. coli</i>   |
| 2014 | 14-CA01781 | Turkey_caecum_content  | EUCAMP2             | 0,5     | 1      | 32  | 8       | 32    | <=1  | <i>C. coli</i>   |

Table S5: Minimum inhibitory concentrations of 6 antimicrobials for isolats of *C. jejuni* and *C. coli* from poultry

| Year | Sample No. | Matrix_final           | Antimicrobial panel | GEN     | STR    | NAL | CIP     | TET   | ERY Species          |
|------|------------|------------------------|---------------------|---------|--------|-----|---------|-------|----------------------|
| 2014 | 14-CA01782 | Turkey_caecum_content  | EUCAMP2             | 0,5     | 2      | 64  | 8       | 64    | <=1 <i>C. coli</i>   |
| 2014 | 14-CA01783 | Turkey_caecum_content  | EUCAMP2             | 0,5     | 1      | 4   | <=0,125 | 64    | <=1 <i>C. jejuni</i> |
| 2014 | 14-CA01794 | Turkey_caecum_content  | EUCAMP2             | 0,25    | 1      | 64  | >16     | >64   | <=1 <i>C. jejuni</i> |
| 2014 | 14-CA01795 | Turkey_caecum_content  | EUCAMP2             | 0,5     | 2      | 32  | 16      | <=0,5 | <=1 <i>C. jejuni</i> |
| 2014 | 14-CA01796 | Turkey_caecum_content  | EUCAMP2             | 0,5     | 2      | >64 | >16     | >64   | 2 <i>C. coli</i>     |
| 2014 | 14-CA01797 | Turkey_caecum_content  | EUCAMP2             | 0,25    | 0,5    | 4   | 0,25    | 64    | <=1 <i>C. jejuni</i> |
| 2014 | 14-CA01804 | Broiler_caecum_content | EUCAMP2             | 0,5     | 2      | 2   | 16      | <=0,5 | <=1 <i>C. jejuni</i> |
| 2014 | 14-CA01815 | Turkey_caecum_content  | EUCAMP2             | 0,5     | 1      | 4   | 0,25    | <=0,5 | <=1 <i>C. jejuni</i> |
| 2014 | 14-CA01816 | Broiler_caecum_content | EUCAMP2             | 0,5     | 0,5    | 32  | >16     | >64   | <=1 <i>C. coli</i>   |
| 2014 | 14-CA01828 | Turkey_caecum_content  | EUCAMP2             | 0,5     | 1      | 64  | >16     | >64   | >128 <i>C. coli</i>  |
| 2014 | 14-CA01829 | Turkey_caecum_content  | EUCAMP2             | 0,5     | 2      | 64  | 16      | <=0,5 | <=1 <i>C. jejuni</i> |
| 2014 | 14-CA01830 | Turkey_caecum_content  | EUCAMP2             | 0,5     | 1      | 64  | 16      | <=0,5 | <=1 <i>C. coli</i>   |
| 2014 | 14-CA01831 | Turkey_caecum_content  | EUCAMP2             | 0,25    | 2      | 4   | <=0,125 | <=0,5 | <=1 <i>C. jejuni</i> |
| 2014 | 14-CA01832 | Turkey_caecum_content  | EUCAMP2             | 0,5     | 1      | 8   | 0,25    | <=0,5 | 2 <i>C. coli</i>     |
| 2014 | 14-CA01833 | Turkey_caecum_content  | EUCAMP2             | 0,5     | 1      | 64  | 8       | >64   | >128 <i>C. coli</i>  |
| 2014 | 14-CA01834 | Turkey_caecum_content  | EUCAMP2             | 0,5     | 1      | 64  | >16     | 64    | >128 <i>C. coli</i>  |
| 2014 | 14-CA01835 | Turkey_caecum_content  | EUCAMP2             | 0,5     | 0,5    | 64  | 16      | 64    | <=1 <i>C. jejuni</i> |
| 2014 | 14-CA01836 | Turkey_caecum_content  | EUCAMP2             | 1       | >16    | >64 | >16     | >64   | 4 <i>C. coli</i>     |
| 2014 | 14-CA01837 | Turkey_caecum_content  | EUCAMP2             | 0,5     | >16    | 32  | >16     | 64    | >128 <i>C. coli</i>  |
| 2014 | 14-CA01838 | Turkey_caecum_content  | EUCAMP2             | 0,5     | 2      | 32  | >16     | >64   | <=1 <i>C. jejuni</i> |
| 2014 | 14-CA01839 | Turkey_caecum_content  | EUCAMP2             | 0,25    | 1      | 32  | >16     | 64    | >128 <i>C. coli</i>  |
| 2014 | 14-CA01840 | Turkey_caecum_content  | EUCAMP2             | 0,25    | 2      | 32  | >16     | >64   | >128 <i>C. coli</i>  |
| 2014 | 14-CA01841 | Turkey_caecum_content  | EUCAMP2             | <=0,125 | <=0,25 | 32  | 16      | 64    | <=1 <i>C. jejuni</i> |
| 2014 | 14-CA01842 | Turkey_caecum_content  | EUCAMP2             | 0,5     | 1      | 64  | 16      | 64    | <=1 <i>C. coli</i>   |
| 2014 | 14-CA01843 | Turkey_caecum_content  | EUCAMP2             | 0,5     | 2      | 64  | >16     | 64    | >128 <i>C. coli</i>  |
| 2014 | 14-CA01844 | Turkey_caecum_content  | EUCAMP2             | 0,5     | 2      | 64  | >16     | >64   | >128 <i>C. coli</i>  |
| 2014 | 14-CA01845 | Turkey_caecum_content  | EUCAMP2             | 0,25    | 1      | 32  | >16     | >64   | >128 <i>C. coli</i>  |
| 2014 | 14-CA01846 | Turkey_caecum_content  | EUCAMP2             | 0,25    | >16    | 64  | 16      | 64    | >128 <i>C. coli</i>  |
| 2014 | 14-CA01847 | Turkey_caecum_content  | EUCAMP2             | 1       | 2      | 2   | 16      | >64   | <=1 <i>C. jejuni</i> |
| 2014 | 14-CA01848 | Turkey_caecum_content  | EUCAMP2             | 0,5     | 1      | 64  | >16     | >64   | <=1 <i>C. coli</i>   |
| 2014 | 14-CA01849 | Turkey_caecum_content  | EUCAMP2             | 0,5     | 2      | 64  | >16     | >64   | >128 <i>C. coli</i>  |
| 2014 | 14-CA01850 | Turkey_caecum_content  | EUCAMP2             | 0,5     | 1      | 8   | 0,5     | >64   | <=1 <i>C. coli</i>   |

Table S5: Minimum inhibitory concentrations of 6 antimicrobials for isolats of *C. jejuni* and *C. coli* from poultry

| Year | Sample No. | Matrix_final           | Antimicrobial panel | GEN     | STR | NAL | CIP     | TET   | ERY  | Species          |
|------|------------|------------------------|---------------------|---------|-----|-----|---------|-------|------|------------------|
| 2014 | 14-CA01850 | Turkey_caecum_content  | EUCAMP2             | 1       | 2   | 4   | <=0,125 | <=0,5 | <=1  | <i>C. jejuni</i> |
| 2014 | 14-CA01851 | Turkey_caecum_content  | EUCAMP2             | 0,25    | 1   | 64  | >16     | >64   | <=1  | <i>C. jejuni</i> |
| 2014 | 14-CA01852 | Turkey_caecum_content  | EUCAMP2             | 1       | 2   | 64  | 16      | >64   |      | 2 <i>C. coli</i> |
| 2014 | 14-CA01853 | Turkey_caecum_content  | EUCAMP2             | 0,25    | 1   | 64  | 16      | 32    | <=1  | <i>C. coli</i>   |
| 2014 | 14-CA01854 | Turkey_caecum_content  | EUCAMP2             | 0,5     | 2   | 64  | 16      | >64   | <=1  | <i>C. coli</i>   |
| 2014 | 14-CA01855 | Turkey_caecum_content  | EUCAMP2             | 0,5     | 2   | 64  | 8       | >64   | <=1  | <i>C. coli</i>   |
| 2014 | 14-CA01856 | Turkey_caecum_content  | EUCAMP2             | 0,5     | 1   | 32  | 8       | >64   | >128 | <i>C. coli</i>   |
| 2014 | 14-CA01857 | Turkey_caecum_content  | EUCAMP2             | 0,5     | 2   | 4   | <=0,125 | <=0,5 | <=1  | <i>C. coli</i>   |
| 2014 | 14-CA01858 | Turkey_caecum_content  | EUCAMP2             | 0,5     | 2   | 4   | <=0,125 | <=0,5 | <=1  | <i>C. coli</i>   |
| 2014 | 14-CA01859 | Turkey_caecum_content  | EUCAMP2             | 0,5     | 1   | 64  | >16     | 32    | <=1  | <i>C. jejuni</i> |
| 2014 | 14-CA01860 | Turkey_caecum_content  | EUCAMP2             | 0,5     | 1   | 64  | >16     | >64   | <=1  | <i>C. jejuni</i> |
| 2014 | 14-CA01861 | Turkey_caecum_content  | EUCAMP2             | 0,25    | 1   | 32  | 16      | 32    | <=1  | <i>C. coli</i>   |
| 2014 | 14-CA01862 | Turkey_caecum_content  | EUCAMP2             | <=0,125 | 0,5 | 8   | 4       | 16    | <=1  | <i>C. jejuni</i> |
| 2014 | 14-CA01863 | Turkey_caecum_content  | EUCAMP2             | 1       | 1   | 64  | 16      | <=0,5 | <=1  | <i>C. jejuni</i> |
| 2014 | 14-CA01864 | Turkey_caecum_content  | EUCAMP2             | 0,25    | 0,5 | 64  | 16      | 16    | <=1  | <i>C. jejuni</i> |
| 2014 | 14-CA01865 | Turkey_caecum_content  | EUCAMP2             | 0,5     | 1   | 64  | 16      | 64    | <=1  | <i>C. jejuni</i> |
| 2014 | 14-CA01876 | Broiler_caecum_content | EUCAMP2             | 0,5     | 1   | 64  | 16      | 64    | <=1  | <i>C. jejuni</i> |
| 2014 | 14-CA01881 | Turkey_caecum_content  | EUCAMP2             | 0,5     | 2   | 64  | 16      | <=0,5 | <=1  | <i>C. jejuni</i> |
| 2014 | 14-CA01882 | Turkey_caecum_content  | EUCAMP2             | 1       | 2   | 4   | 0,25    | <=0,5 | <=1  | <i>C. jejuni</i> |
| 2014 | 14-CA01883 | Turkey_caecum_content  | EUCAMP2             | 0,25    | 0,5 | 32  | 16      | 64    | <=1  | <i>C. jejuni</i> |
| 2014 | 15-CA00010 | Turkey_caecum_content  | EUCAMP2             | 0,5     | 2   | 64  | >16     | >64   |      | 2 <i>C. coli</i> |
| 2014 | 15-CA00011 | Broiler_caecum_content | EUCAMP2             | 0,25    | 1   | 32  | >16     | <=0,5 | <=1  | <i>C. jejuni</i> |
| 2014 | 15-CA00012 | Broiler_caecum_content | EUCAMP2             | <=0,125 | 0,5 | 64  | >16     | 32    | <=1  | <i>C. jejuni</i> |
| 2014 | 15-CA00013 | Broiler_caecum_content | EUCAMP2             | 0,5     | 1   | 64  | 16      | 32    | >128 | <i>C. coli</i>   |
| 2014 | 15-CA00014 | Broiler_caecum_content | EUCAMP2             | 0,5     | 1   | 64  | 8       | 64    | <=1  | <i>C. jejuni</i> |
| 2014 | 15-CA00041 | Broiler_caecum_content | EUCAMP2             | 1       | 2   | 4   | <=0,125 | <=0,5 | <=1  | <i>C. jejuni</i> |
| 2014 | 15-CA00042 | Broiler_caecum_content | EUCAMP2             | 0,5     | 2   | 64  | 16      | 16    | <=1  | <i>C. jejuni</i> |
| 2014 | 15-CA00043 | Broiler_caecum_content | EUCAMP2             | 0,5     | 1   | 4   | <=0,125 | <=0,5 | <=1  | <i>C. jejuni</i> |
| 2014 | 15-CA00044 | Broiler_caecum_content | EUCAMP2             | 1       | 2   | 64  | 16      | >64   | <=1  | <i>C. coli</i>   |
| 2014 | 15-CA00045 | Turkey_caecum_content  | EUCAMP2             | 0,5     | 0,5 | 8   | 0,25    | <=0,5 | <=1  | <i>C. jejuni</i> |
| 2014 | 15-CA00046 | Turkey_caecum_content  | EUCAMP2             | 0,25    | 0,5 | 64  | 16      | 64    | <=1  | <i>C. coli</i>   |
| 2014 | 15-CA00047 | Turkey_caecum_content  | EUCAMP2             | 0,25    | 2   | 64  | 8       | 64    | <=1  | <i>C. coli</i>   |

Table S5: Minimum inhibitory concentrations of 6 antimicrobials for isolats of *C. jejuni* and *C. coli* from poultry

| Year | Sample No. | Matrix_final           | Antimicrobial panel | GEN      | STR | NAL       | CIP      | TET     | ERY | Species          |
|------|------------|------------------------|---------------------|----------|-----|-----------|----------|---------|-----|------------------|
| 2014 | 15-CA00048 | Turkey_caecum_content  | EUCAMP2             | 0,25     | 0,5 | 64 >16    |          | 64 <=1  |     | <i>C. jejuni</i> |
| 2014 | 15-CA00049 | Turkey_caecum_content  | EUCAMP2             | 0,5      | 2   | 64        | 8        | 64      | <=1 | <i>C. coli</i>   |
| 2016 | 16-CA00122 | Broiler_caecum_content | EUCAMP2             | 0,25     | 1   | 4 <=0,125 | <=0,5    | <=1     |     | <i>C. jejuni</i> |
| 2016 | 16-CA00132 | Turkey_caecum_content  | EUCAMP2             | 1 >16    | >64 | >16       | >64      | >128    |     | <i>C. coli</i>   |
| 2016 | 16-CA00143 | Turkey_caecum_content  | EUCAMP2             | 0,5      | 2   | 64        | >16      | 8       | <=1 | <i>C. jejuni</i> |
| 2016 | 16-CA00228 | Turkey_caecum_content  | EUCAMP2             | 0,25     | 2   | 32        | 16       | 64 >128 |     | <i>C. coli</i>   |
| 2016 | 16-CA00229 | Turkey_caecum_content  | EUCAMP2             | 1        | 2   | 64        | 8        | 64 <=1  |     | <i>C. coli</i>   |
| 2016 | 16-CA00230 | Broiler_caecum_content | EUCAMP2             | 0,25     | 1   | 64 >16    | <=0,5    | <=1     |     | <i>C. jejuni</i> |
| 2016 | 16-CA00231 | Broiler_caecum_content | EUCAMP2             | 0,5      | 2   | 4         | 0,25     | <=0,5   | <=1 | <i>C. jejuni</i> |
| 2016 | 16-CA00241 | Turkey_caecum_content  | EUCAMP2             | 0,25     | 0,5 | 16        | 8        | 16 <=1  |     | <i>C. jejuni</i> |
| 2016 | 16-CA00242 | Turkey_caecum_content  | EUCAMP2             | 0,25     | 2   | 32 >16    |          | 64      | 2   | <i>C. coli</i>   |
| 2016 | 16-CA00243 | Broiler_caecum_content | EUCAMP2             | 0,5      | 2   | 32        | 16       | 32      | <=1 | <i>C. jejuni</i> |
| 2016 | 16-CA00250 | Broiler_caecum_content | EUCAMP2             | 0,5      | 2   | 64        | 16       | <=0,5   | <=1 | <i>C. jejuni</i> |
| 2016 | 16-CA00251 | Broiler_caecum_content | EUCAMP2             | 0,5      | 2   | 64        | 16       | <=0,5   | <=1 | <i>C. jejuni</i> |
| 2016 | 16-CA00268 | Turkey_caecum_content  | EUCAMP2             | 0,25     | 1   | 32        | 16 <=0,5 | <=1     |     | <i>C. coli</i>   |
| 2016 | 16-CA00276 | Turkey_caecum_content  | EUCAMP2             | 0,5      | 1   | 32        | 16       | 64      | <=1 | <i>C. jejuni</i> |
| 2016 | 16-CA00277 | Turkey_caecum_content  | EUCAMP2             | 0,5      | 2   | 32        | >16      | <=0,5   | <=1 | <i>C. jejuni</i> |
| 2016 | 16-CA00278 | Turkey_caecum_content  | EUCAMP2             | 0,25     | 1   | 64 >16    | >64      |         | 2   | <i>C. jejuni</i> |
| 2016 | 16-CA00279 | Turkey_caecum_content  | EUCAMP2             | 0,5      | 2   | 64        | 16       | 64      | <=1 | <i>C. coli</i>   |
| 2016 | 16-CA00280 | Broiler_caecum_content | EUCAMP2             | 0,5      | 2   | 2 <=0,125 | <=0,5    | <=1     |     | <i>C. jejuni</i> |
| 2016 | 16-CA00282 | Turkey_caecum_content  | EUCAMP2             | 0,5      | 2   | 4         | 0,25     | <=0,5   | <=1 | <i>C. jejuni</i> |
| 2016 | 16-CA00283 | Turkey_caecum_content  | EUCAMP2             | 0,5      | 2   | 64        | >16      | >64     | 2   | <i>C. coli</i>   |
| 2016 | 16-CA00284 | Broiler_caecum_content | EUCAMP2             | 0,5      | 2   | 64        | 16       | <=0,5   | <=1 | <i>C. jejuni</i> |
| 2016 | 16-CA00286 | Turkey_caecum_content  | EUCAMP2             | 0,25 >16 |     | 32 >16    | >64      | >128    |     | <i>C. coli</i>   |
| 2016 | 16-CA00287 | Turkey_caecum_content  | EUCAMP2             | 0,5      | 1   | 64        | 16       | >64     | <=1 | <i>C. jejuni</i> |
| 2016 | 16-CA00288 | Turkey_caecum_content  | EUCAMP2             | 0,5      | 1   | 64        | >16      | >64     | <=1 | <i>C. jejuni</i> |
| 2016 | 16-CA00289 | Turkey_caecum_content  | EUCAMP2             | 0,5      | 1   | 64        | >16      | >64     | <=1 | <i>C. jejuni</i> |
| 2016 | 16-CA00290 | Turkey_caecum_content  | EUCAMP2             | 0,5      | 2   | 32        | 8        | 32      | <=1 | <i>C. coli</i>   |
| 2016 | 16-CA00291 | Turkey_caecum_content  | EUCAMP2             | 0,25     | 2   | 32        | 16 >64   |         | 2   | <i>C. coli</i>   |
| 2016 | 16-CA00292 | Turkey_caecum_content  | EUCAMP2             | 0,25     | 2   | 32 >16    |          | 64 <=1  |     | <i>C. coli</i>   |
| 2016 | 16-CA00293 | Turkey_caecum_content  | EUCAMP2             | 0,25 >16 |     | 64 >16    | >64      | >128    |     | <i>C. coli</i>   |
| 2016 | 16-CA00294 | Turkey_caecum_content  | EUCAMP2             | 0,5      | 1   | 64        | 16       | <=0,5   | <=1 | <i>C. jejuni</i> |

Table S5: Minimum inhibitory concentrations of 6 antimicrobials for isolats of *C. jejuni* and *C. coli* from poultry

| Year | Sample No. | Matrix_final           | Antimicrobial panel | GEN  | STR    | NAL | CIP     | TET   | ERY Species          |
|------|------------|------------------------|---------------------|------|--------|-----|---------|-------|----------------------|
| 2016 | 16-CA00331 | Broiler_caecum_content | EUCAMP2             | 0,5  | 1      | 64  | 16      | <=0,5 | <=1 <i>C. jejuni</i> |
| 2016 | 16-CA00332 | Broiler_caecum_content | EUCAMP2             | 0,5  | 1      | 32  | 8       | <=0,5 | <=1 <i>C. jejuni</i> |
| 2016 | 16-CA00339 | Broiler_caecum_content | EUCAMP2             | 0,5  | 2      | >64 | 16      | 16    | 2 <i>C. jejuni</i>   |
| 2016 | 16-CA00340 | Broiler_caecum_content | EUCAMP2             | 1    | 8      | 32  | 16      | <=0,5 | <=1 <i>C. jejuni</i> |
| 2016 | 16-CA00341 | Broiler_caecum_content | EUCAMP2             | 0,5  | 2      | 64  | 16      | 64    | <=1 <i>C. jejuni</i> |
| 2016 | 16-CA00344 | Turkey_caecum_content  | EUCAMP2             | 0,5  | 1      | 2   | 16      | <=0,5 | <=1 <i>C. jejuni</i> |
| 2016 | 16-CA00345 | Broiler_caecum_content | EUCAMP2             | 0,5  | 1      | 32  | 16      | 32    | <=1 <i>C. jejuni</i> |
| 2016 | 16-CA00346 | Broiler_caecum_content | EUCAMP2             | 0,5  | 1      | 32  | 16      | 32    | <=1 <i>C. jejuni</i> |
| 2016 | 16-CA00368 | Turkey_caecum_content  | EUCAMP2             | 0,25 | 1      | 32  | >16     | <=0,5 | <=1 <i>C. coli</i>   |
| 2016 | 16-CA00370 | Broiler_caecum_content | EUCAMP2             | 0,25 | 1      | 32  | 16      | <=0,5 | <=1 <i>C. jejuni</i> |
| 2016 | 16-CA00371 | Broiler_caecum_content | EUCAMP2             | 1    | 2      | >64 | 16      | <=0,5 | <=1 <i>C. jejuni</i> |
| 2016 | 16-CA00372 | Turkey_caecum_content  | EUCAMP2             | 0,5  | 2      | 64  | 16      | <=0,5 | <=1 <i>C. jejuni</i> |
| 2016 | 16-CA00373 | Broiler_caecum_content | EUCAMP2             | 0,25 | 1      | 64  | >16     | <=0,5 | <=1 <i>C. jejuni</i> |
| 2016 | 16-CA00377 | Broiler_caecum_content | EUCAMP2             | 0,25 | 1      | 4   | 0,25    | <=0,5 | 2 <i>C. jejuni</i>   |
| 2016 | 16-CA00390 | Broiler_caecum_content | EUCAMP2             | 0,25 | <=0,25 | 4   | 0,25    | <=0,5 | <=1 <i>C. jejuni</i> |
| 2016 | 16-CA00403 | Turkey_caecum_content  | EUCAMP2             | 0,5  | 1      | 32  | 8       | <=0,5 | <=1 <i>C. coli</i>   |
| 2016 | 16-CA00410 | Turkey_caecum_content  | EUCAMP2             | 0,5  | 1      | 64  | >16     | >64   | <=1 <i>C. jejuni</i> |
| 2016 | 16-CA00411 | Turkey_caecum_content  | EUCAMP2             | 0,5  | 2      | 64  | >16     | 64    | 2 <i>C. coli</i>     |
| 2016 | 16-CA00412 | Turkey_caecum_content  | EUCAMP2             | 0,25 | 0,5    | 4   | <=0,125 | <=0,5 | <=1 <i>C. jejuni</i> |
| 2016 | 16-CA00413 | Turkey_caecum_content  | EUCAMP2             | 1    | 2      | 64  | 16      | 64    | 2 <i>C. coli</i>     |
| 2016 | 16-CA00414 | Turkey_caecum_content  | EUCAMP2             | 0,25 | 2      | 32  | 16      | 64    | <=1 <i>C. coli</i>   |
| 2016 | 16-CA00415 | Turkey_caecum_content  | EUCAMP2             | 1    | 8      | 2   | >16     | >64   | <=1 <i>C. jejuni</i> |
| 2016 | 16-CA00416 | Turkey_caecum_content  | EUCAMP2             | 0,25 | 1      | 32  | >16     | >64   | <=1 <i>C. jejuni</i> |
| 2016 | 16-CA00417 | Turkey_caecum_content  | EUCAMP2             | 0,5  | 2      | 64  | 16      | >64   | <=1 <i>C. coli</i>   |
| 2016 | 16-CA00418 | Turkey_caecum_content  | EUCAMP2             | 0,5  | 1      | >64 | 16      | <=0,5 | <=1 <i>C. jejuni</i> |
| 2016 | 16-CA00419 | Turkey_caecum_content  | EUCAMP2             | 1    | >16    | 64  | 16      | <=0,5 | <=1 <i>C. jejuni</i> |
| 2016 | 16-CA00420 | Turkey_caecum_content  | EUCAMP2             | 0,5  | 2      | 4   | 0,25    | <=0,5 | <=1 <i>C. jejuni</i> |
| 2016 | 16-CA00421 | Turkey_caecum_content  | EUCAMP2             | 0,5  | 2      | 64  | 16      | 64    | <=1 <i>C. coli</i>   |
| 2016 | 16-CA00422 | Turkey_caecum_content  | EUCAMP2             | 0,5  | 1      | >64 | >16     | >64   | <=1 <i>C. coli</i>   |
| 2016 | 16-CA00423 | Turkey_caecum_content  | EUCAMP2             | 0,5  | 1      | >64 | 16      | <=0,5 | <=1 <i>C. jejuni</i> |
| 2016 | 16-CA00424 | Turkey_caecum_content  | EUCAMP2             | 0,5  | 2      | >64 | >16     | 64    | <=1 <i>C. coli</i>   |
| 2016 | 16-CA00425 | Turkey_caecum_content  | EUCAMP2             | 0,5  | 2      | 64  | 16      | <=0,5 | <=1 <i>C. jejuni</i> |



Table S5: Minimum inhibitory concentrations of 6 antimicrobials for isolats of *C. jejuni* and *C. coli* from poultry

| Year | Sample No. | Matrix_final           | Antimicrobial panel | GEN  | STR | NAL | CIP     | TET   | ERY  | Species            |
|------|------------|------------------------|---------------------|------|-----|-----|---------|-------|------|--------------------|
| 2016 | 16-CA00426 | Turkey_caecum_content  | EUCAMP2             | 0,25 | 1   | 32  | 16      | 64    | <=1  | <i>C. coli</i>     |
| 2016 | 16-CA00427 | Turkey_caecum_content  | EUCAMP2             | 1    | 2   | 64  | 16      | 64    | <=1  | <i>C. coli</i>     |
| 2016 | 16-CA00428 | Turkey_caecum_content  | EUCAMP2             | 0,25 | 1   | 64  | 16      | 32    | <=1  | <i>C. coli</i>     |
| 2016 | 16-CA00429 | Broiler_caecum_content | EUCAMP2             | 0,5  | 2   | >64 | >16     | >64   |      | 2 <i>C. jejuni</i> |
| 2016 | 16-CA00430 | Broiler_caecum_content | EUCAMP2             | 1    | 2   | 4   | 0,25    | <=0,5 | <=1  | <i>C. jejuni</i>   |
| 2016 | 16-CA00431 | Turkey_caecum_content  | EUCAMP2             | 0,5  | 0,5 | 4   | 0,25    | <=0,5 | <=1  | <i>C. jejuni</i>   |
| 2016 | 16-CA00432 | Turkey_caecum_content  | EUCAMP2             | 0,5  | 2   | 64  | >16     | >64   |      | 2 <i>C. coli</i>   |
| 2016 | 16-CA00433 | Turkey_caecum_content  | EUCAMP2             | 0,5  | 2   | 64  | 16      | 64    |      | 2 <i>C. coli</i>   |
| 2016 | 16-CA00434 | Turkey_caecum_content  | EUCAMP2             | 0,5  | 2   | 64  | 16      | <=0,5 | <=1  | <i>C. jejuni</i>   |
| 2016 | 16-CA00435 | Turkey_caecum_content  | EUCAMP2             | 0,5  | 1   | 32  | 8       | <=0,5 | <=1  | <i>C. jejuni</i>   |
| 2016 | 16-CA00436 | Turkey_caecum_content  | EUCAMP2             | 0,5  | 2   | 32  | 8       | 64    | >128 | <i>C. coli</i>     |
| 2016 | 16-CA00437 | Turkey_caecum_content  | EUCAMP2             | 0,5  | 1   | 32  | 4       | <=0,5 | <=1  | <i>C. coli</i>     |
| 2016 | 16-CA00438 | Turkey_caecum_content  | EUCAMP2             | 0,5  | 1   | >64 | 16      | <=0,5 |      | 2 <i>C. jejuni</i> |
| 2016 | 16-CA00439 | Broiler_caecum_content | EUCAMP2             | 0,5  | 1   | 64  | >16     | >64   | <=1  | <i>C. jejuni</i>   |
| 2016 | 16-CA00440 | Turkey_caecum_content  | EUCAMP2             | 0,25 | 1   | 16  | 8       | 32    | >128 | <i>C. coli</i>     |
| 2016 | 16-CA00440 | Turkey_caecum_content  | EUCAMP2             | 0,5  | >16 | 64  | 16      | 64    | <=1  | <i>C. jejuni</i>   |
| 2016 | 16-CA00441 | Turkey_caecum_content  | EUCAMP2             | 1    | 2   | 4   | 0,25    | <=0,5 | <=1  | <i>C. jejuni</i>   |
| 2016 | 16-CA00442 | Turkey_caecum_content  | EUCAMP2             | 0,5  | 0,5 | 4   | <=0,125 | <=0,5 | <=1  | <i>C. jejuni</i>   |
| 2016 | 16-CA00443 | Turkey_caecum_content  | EUCAMP2             | 0,5  | 1   | 32  | 16      | <=0,5 | <=1  | <i>C. coli</i>     |
| 2016 | 16-CA00444 | Turkey_caecum_content  | EUCAMP2             | 0,25 | 1   | 32  | 16      | 32    | <=1  | <i>C. coli</i>     |
| 2016 | 16-CA00445 | Turkey_caecum_content  | EUCAMP2             | 0,5  | 2   | 32  | 8       | 16    | <=1  | <i>C. coli</i>     |
| 2016 | 16-CA00446 | Turkey_caecum_content  | EUCAMP2             | 0,5  | 1   | 32  | 8       | <=0,5 | <=1  | <i>C. jejuni</i>   |
| 2016 | 16-CA00447 | Turkey_caecum_content  | EUCAMP2             | 0,5  | 1   | 32  | 16      | 32    | <=1  | <i>C. jejuni</i>   |
| 2016 | 16-CA00448 | Turkey_caecum_content  | EUCAMP2             | 1    | 2   | 64  | 16      | <=0,5 | <=1  | <i>C. jejuni</i>   |
| 2016 | 16-CA00452 | Broiler_caecum_content | EUCAMP2             | 0,5  | 1   | 8   | 0,25    | <=0,5 |      | 2 <i>C. jejuni</i> |
| 2016 | 16-CA00453 | Broiler_caecum_content | EUCAMP2             | 0,5  | 2   | 64  | 16      | <=0,5 | <=1  | <i>C. jejuni</i>   |
| 2016 | 16-CA00461 | Broiler_caecum_content | EUCAMP2             | 0,25 | 1   | 8   | 0,5     | <=0,5 | <=1  | <i>C. jejuni</i>   |
| 2016 | 16-CA00469 | Turkey_caecum_content  | EUCAMP2             | 0,25 | 1   | 64  | >16     | >64   | <=1  | <i>C. jejuni</i>   |
| 2016 | 16-CA00476 | Broiler_caecum_content | EUCAMP2             | 0,5  | 1   | 64  | 16      | 64    | <=1  | <i>C. jejuni</i>   |
| 2016 | 16-CA00477 | Broiler_caecum_content | EUCAMP2             | 0,25 | >16 | 32  | >16     | 32    | <=1  | <i>C. coli</i>     |
| 2016 | 16-CA00482 | Broiler_caecum_content | EUCAMP2             | 0,5  | 2   | 64  | 16      | 32    | <=1  | <i>C. coli</i>     |
| 2016 | 16-CA00496 | Broiler_caecum_content | EUCAMP2             | 0,5  | 1   | 2   | 0,25    | <=0,5 | <=1  | <i>C. jejuni</i>   |

Table S5: Minimum inhibitory concentrations of 6 antimicrobials for isolats of *C. jejuni* and *C. coli* from poultry

| Year | Sample No. | Matrix_final           | Antimicrobial panel | GEN     | STR | NAL | CIP     | TET   | ERY  | Species          |
|------|------------|------------------------|---------------------|---------|-----|-----|---------|-------|------|------------------|
| 2016 | 16-CA00502 | Turkey_caecum_content  | EUCAMP2             | <=0,125 | >16 | 2   | <=0,125 | 4     | <=1  | <i>C. coli</i>   |
| 2016 | 16-CA00529 | Turkey_caecum_content  | EUCAMP2             | 0,5     | 1   | 32  | 16      | <=0,5 | <=1  | <i>C. jejuni</i> |
| 2016 | 16-CA00530 | Turkey_caecum_content  | EUCAMP2             | 0,5     | 1   | 64  | >16     | <=0,5 | 2    | <i>C. coli</i>   |
| 2016 | 16-CA00531 | Turkey_caecum_content  | EUCAMP2             | 0,5     | 2   | 64  | >16     | 32    | 4    | <i>C. coli</i>   |
| 2016 | 16-CA00532 | Turkey_caecum_content  | EUCAMP2             | 0,5     | 1   | 64  | 16      | 32    | <=1  | <i>C. coli</i>   |
| 2016 | 16-CA00533 | Turkey_caecum_content  | EUCAMP2             | 0,5     | 1   | 32  | >16     | 64    | <=1  | <i>C. coli</i>   |
| 2016 | 16-CA00534 | Turkey_caecum_content  | EUCAMP2             | 0,5     | 1   | 4   | 0,25    | <=0,5 | <=1  | <i>C. jejuni</i> |
| 2016 | 16-CA00535 | Turkey_caecum_content  | EUCAMP2             | 0,25    | 1   | 32  | 16      | 16    | <=1  | <i>C. coli</i>   |
| 2016 | 16-CA00536 | Turkey_caecum_content  | EUCAMP2             | 0,5     | 2   | 64  | 16      | 64    | <=1  | <i>C. coli</i>   |
| 2016 | 16-CA00537 | Turkey_caecum_content  | EUCAMP2             | 0,5     | 1   | 32  | 16      | 64    | >128 | <i>C. coli</i>   |
| 2016 | 16-CA00538 | Turkey_caecum_content  | EUCAMP2             | 0,5     | 1   | 32  | 16      | 32    | <=1  | <i>C. jejuni</i> |
| 2016 | 16-CA00539 | Turkey_caecum_content  | EUCAMP2             | 0,5     | 1   | 64  | >16     | <=0,5 | <=1  | <i>C. jejuni</i> |
| 2016 | 16-CA00540 | Turkey_caecum_content  | EUCAMP2             | 0,25    | 1   | 32  | >16     | 64    | >128 | <i>C. coli</i>   |
| 2016 | 16-CA00541 | Turkey_caecum_content  | EUCAMP2             | 0,5     | 2   | 64  | 16      | <=0,5 | <=1  | <i>C. jejuni</i> |
| 2016 | 16-CA00542 | Turkey_caecum_content  | EUCAMP2             | 0,5     | 1   | 64  | >16     | >64   | <=1  | <i>C. jejuni</i> |
| 2016 | 16-CA00543 | Turkey_caecum_content  | EUCAMP2             | 0,5     | 1   | 32  | 16      | 64    | 2    | <i>C. coli</i>   |
| 2016 | 16-CA00544 | Turkey_caecum_content  | EUCAMP2             | 0,25    | 2   | 16  | >16     | 64    | 4    | <i>C. coli</i>   |
| 2016 | 16-CA00545 | Turkey_caecum_content  | EUCAMP2             | 0,25    | 2   | 8   | 16      | 32    | 2    | <i>C. coli</i>   |
| 2016 | 16-CA00546 | Turkey_caecum_content  | EUCAMP2             | 0,5     | >16 | 64  | 16      | 64    | >128 | <i>C. coli</i>   |
| 2016 | 16-CA00547 | Turkey_caecum_content  | EUCAMP2             | 0,25    | 1   | 64  | >16     | <=0,5 | <=1  | <i>C. jejuni</i> |
| 2016 | 16-CA00548 | Turkey_caecum_content  | EUCAMP2             | 0,25    | 1   | 64  | 16      | 32    | <=1  | <i>C. coli</i>   |
| 2016 | 16-CA00549 | Turkey_caecum_content  | EUCAMP2             | 0,25    | 1   | 64  | 16      | 32    | <=1  | <i>C. coli</i>   |
| 2016 | 16-CA00550 | Turkey_caecum_content  | EUCAMP2             | 0,25    | 1   | 64  | 16      | 32    | <=1  | <i>C. coli</i>   |
| 2016 | 16-CA00551 | Turkey_caecum_content  | EUCAMP2             | 0,5     | 1   | 64  | >16     | >64   | <=1  | <i>C. jejuni</i> |
| 2016 | 16-CA00552 | Turkey_caecum_content  | EUCAMP2             | <=0,125 | 1   | 32  | 4       | 8     | <=1  | <i>C. coli</i>   |
| 2016 | 16-CA00553 | Turkey_caecum_content  | EUCAMP2             | 0,5     | 1   | 32  | 16      | 32    | <=1  | <i>C. coli</i>   |
| 2016 | 16-CA00554 | Turkey_caecum_content  | EUCAMP2             | 0,5     | 1   | >64 | >16     | <=0,5 | 2    | <i>C. jejuni</i> |
| 2016 | 16-CA00555 | Turkey_caecum_content  | EUCAMP2             | 0,5     | 2   | >64 | >16     | <=0,5 | <=1  | <i>C. jejuni</i> |
| 2016 | 16-CA00557 | Turkey_caecum_content  | EUCAMP2             | 0,5     | 1   | 64  | >16     | <=0,5 | <=1  | <i>C. jejuni</i> |
| 2016 | 16-CA00558 | Broiler_caecum_content | EUCAMP2             | 0,5     | >16 | 4   | <=0,125 | 8     | <=1  | <i>C. coli</i>   |
| 2016 | 16-CA00559 | Broiler_caecum_content | EUCAMP2             | 0,25    | 1   | 32  | >16     | 64    | <=1  | <i>C. jejuni</i> |
| 2016 | 16-CA00560 | Turkey_caecum_content  | EUCAMP2             | 0,25    | 1   | 16  | 4       | 16    | >128 | <i>C. coli</i>   |

Table S5: Minimum inhibitory concentrations of 6 antimicrobials for isolats of *C. jejuni* and *C. coli* from poultry

| Year | Sample No. | Matrix_final           | Antimicrobial panel | GEN     | STR | NAL | CIP     | TET   | ERY  | Species          |
|------|------------|------------------------|---------------------|---------|-----|-----|---------|-------|------|------------------|
| 2016 | 16-CA00561 | Turkey_caecum_content  | EUCAMP2             | 0,5     | 2   | 32  | 16      | 64    | 2    | <i>C. coli</i>   |
| 2016 | 16-CA00581 | Turkey_caecum_content  | EUCAMP2             | <=0,125 | 1   | 4   | 0,25    | <=0,5 | <=1  | <i>C. coli</i>   |
| 2016 | 16-CA00588 | Turkey_caecum_content  | EUCAMP2             | 0,25    | 2   | 32  | 8       | 64    | <=1  | <i>C. coli</i>   |
| 2016 | 16-CA00590 | Broiler_caecum_content | EUCAMP2             | 1       | 4   | 32  | 16      | <=0,5 | <=1  | <i>C. jejuni</i> |
| 2016 | 16-CA00598 | Turkey_caecum_content  | EUCAMP2             | 0,25    | 0,5 | <=1 | 8       | <=0,5 | <=1  | <i>C. jejuni</i> |
| 2016 | 16-CA00609 | Turkey_caecum_content  | EUCAMP2             | 0,5     | 1   | 64  | 16      | 64    | <=1  | <i>C. jejuni</i> |
| 2016 | 16-CA00610 | Turkey_caecum_content  | EUCAMP2             | 0,5     | 1   | 64  | 16      | >64   | <=1  | <i>C. jejuni</i> |
| 2016 | 16-CA00619 | Broiler_caecum_content | EUCAMP2             | 0,5     | 2   | 64  | >16     | >64   | 2    | <i>C. jejuni</i> |
| 2016 | 16-CA00620 | Broiler_caecum_content | EUCAMP2             | 0,5     | 1   | 4   | <=0,125 | <=0,5 | <=1  | <i>C. jejuni</i> |
| 2016 | 16-CA00621 | Broiler_caecum_content | EUCAMP2             | 0,5     | 1   | 4   | 0,25    | <=0,5 | <=1  | <i>C. jejuni</i> |
| 2016 | 16-CA00639 | Turkey_caecum_content  | EUCAMP2             | 0,5     | 1   | 32  | 16      | >64   | >128 | <i>C. coli</i>   |
| 2016 | 16-CA00640 | Turkey_caecum_content  | EUCAMP2             | 0,25    | 1   | 32  | >16     | 16    | 2    | <i>C. coli</i>   |
| 2016 | 16-CA00641 | Turkey_caecum_content  | EUCAMP2             | 0,5     | 1   | 32  | 16      | 64    | 2    | <i>C. coli</i>   |
| 2016 | 16-CA00641 | Turkey_caecum_content  | EUCAMP2             | 0,5     | 1   | >64 | >16     | <=0,5 | <=1  | <i>C. jejuni</i> |
| 2016 | 16-CA00642 | Turkey_caecum_content  | EUCAMP2             | 0,5     | 1   | 32  | 16      | 64    | 4    | <i>C. coli</i>   |
| 2016 | 16-CA00643 | Turkey_caecum_content  | EUCAMP2             | 0,5     | 2   | 4   | 0,25    | <=0,5 | <=1  | <i>C. jejuni</i> |
| 2016 | 16-CA00644 | Broiler_caecum_content | EUCAMP2             | 0,25    | 1   | 16  | 16      | 32    | <=1  | <i>C. jejuni</i> |
| 2016 | 16-CA00645 | Turkey_caecum_content  | EUCAMP2             | 0,25    | 1   | 64  | >16     | <=0,5 | <=1  | <i>C. jejuni</i> |
| 2016 | 16-CA00646 | Turkey_caecum_content  | EUCAMP2             | 0,5     | 1   | 64  | 16      | <=0,5 | <=1  | <i>C. coli</i>   |
| 2016 | 16-CA00647 | Turkey_caecum_content  | EUCAMP2             | 0,5     | 1   | 64  | 16      | <=0,5 | <=1  | <i>C. coli</i>   |
| 2016 | 16-CA00648 | Turkey_caecum_content  | EUCAMP2             | 0,25    | 0,5 | 64  | >16     | <=0,5 | <=1  | <i>C. jejuni</i> |
| 2016 | 16-CA00649 | Turkey_caecum_content  | EUCAMP2             | 0,5     | 2   | 64  | 8       | <=0,5 | <=1  | <i>C. coli</i>   |
| 2016 | 16-CA00650 | Turkey_caecum_content  | EUCAMP2             | 0,5     | 2   | 64  | >16     | 64    | 4    | <i>C. coli</i>   |
| 2016 | 16-CA00651 | Turkey_caecum_content  | EUCAMP2             | 0,5     | 2   | 32  | 0,5     | <=0,5 | <=1  | <i>C. jejuni</i> |
| 2016 | 16-CA00652 | Turkey_caecum_content  | EUCAMP2             | 0,5     | 2   | 32  | 8       | <=0,5 | <=1  | <i>C. coli</i>   |
| 2016 | 16-CA00653 | Turkey_caecum_content  | EUCAMP2             | 0,25    | 1   | 32  | 16      | 32    | <=1  | <i>C. coli</i>   |
| 2016 | 16-CA00654 | Turkey_caecum_content  | EUCAMP2             | 0,25    | 1   | 64  | 16      | 32    | <=1  | <i>C. coli</i>   |
| 2016 | 16-CA00655 | Broiler_caecum_content | EUCAMP2             | 0,5     | 1   | 32  | >16     | 64    | 4    | <i>C. coli</i>   |
| 2016 | 16-CA00656 | Broiler_caecum_content | EUCAMP2             | 0,5     | 2   | 4   | 0,25    | <=0,5 | <=1  | <i>C. jejuni</i> |
| 2016 | 16-CA00662 | Turkey_caecum_content  | EUCAMP2             | 0,5     | >16 | 4   | 0,25    | <=0,5 | 2    | <i>C. coli</i>   |
| 2016 | 16-CA00662 | Turkey_caecum_content  | EUCAMP2             | 0,5     | 1   | 64  | >16     | <=0,5 | 2    | <i>C. jejuni</i> |
| 2016 | 16-CA00663 | Turkey_caecum_content  | EUCAMP2             | 0,5     | 2   | 2   | >16     | <=0,5 | <=1  | <i>C. jejuni</i> |

Table S5: Minimum inhibitory concentrations of 6 antimicrobials for isolats of *C. jejuni* and *C. coli* from poultry

| Year | Sample No. | Matrix_final           | Antimicrobial panel | GEN     | STR    | NAL | CIP     | TET   | ERY Species          |
|------|------------|------------------------|---------------------|---------|--------|-----|---------|-------|----------------------|
| 2016 | 16-CA00664 | Turkey_caecum_content  | EUCAMP2             | 0,5     | 2      | 64  | >16     | <=0,5 | 2 <i>C. coli</i>     |
| 2016 | 16-CA00665 | Turkey_caecum_content  | EUCAMP2             | 0,5     | 1      | 32  | 16      | <=0,5 | <=1 <i>C. coli</i>   |
| 2016 | 16-CA00700 | Turkey_caecum_content  | EUCAMP2             | <=0,125 | 16     | 32  | 8       | <=0,5 | <=1 <i>C. jejuni</i> |
| 2016 | 16-CA00701 | Broiler_caecum_content | EUCAMP2             | 0,25    | 1      | 4   | 0,5     | <=0,5 | <=1 <i>C. jejuni</i> |
| 2016 | 16-CA00703 | Turkey_caecum_content  | EUCAMP2             | <=0,125 | 0,5    | 4   | <=0,125 | <=0,5 | <=1 <i>C. jejuni</i> |
| 2016 | 16-CA00704 | Turkey_caecum_content  | EUCAMP2             | 0,25    | 1      | 32  | 16      | 64    | <=1 <i>C. jejuni</i> |
| 2016 | 16-CA00713 | Broiler_caecum_content | EUCAMP2             | 0,5     | 1      | 64  | 16      | <=0,5 | <=1 <i>C. jejuni</i> |
| 2016 | 16-CA00714 | Broiler_caecum_content | EUCAMP2             | <=0,125 | <=0,25 | 32  | 16      | 32    | <=1 <i>C. jejuni</i> |
| 2016 | 16-CA00732 | Broiler_caecum_content | EUCAMP2             | 0,25    | 1      | 32  | 16      | 64    | 2 <i>C. coli</i>     |
| 2016 | 16-CA00743 | Broiler_caecum_content | EUCAMP2             | 0,25    | 1      | 32  | 16      | 64    | <=1 <i>C. jejuni</i> |
| 2016 | 16-CA00744 | Broiler_caecum_content | EUCAMP2             | 0,25    | 1      | 32  | >16     | 64    | <=1 <i>C. coli</i>   |
| 2016 | 16-CA00774 | Broiler_caecum_content | EUCAMP2             | 1       | 2      | 4   | 0,25    | <=0,5 | <=1 <i>C. jejuni</i> |
| 2016 | 16-CA00775 | Broiler_caecum_content | EUCAMP2             | 0,5     | 1      | 64  | 16      | >64   | <=1 <i>C. jejuni</i> |
| 2016 | 16-CA00777 | Broiler_caecum_content | EUCAMP2             | 0,5     | 1      | 64  | 16      | <=0,5 | <=1 <i>C. jejuni</i> |
| 2016 | 16-CA00780 | Broiler_caecum_content | EUCAMP2             | 1       | 2      | 4   | <=0,125 | <=0,5 | <=1 <i>C. coli</i>   |
| 2016 | 16-CA00781 | Broiler_caecum_content | EUCAMP2             | 0,25    | 0,5    | 64  | >16     | <=0,5 | <=1 <i>C. jejuni</i> |
| 2016 | 16-CA00783 | Broiler_caecum_content | EUCAMP2             | 0,5     | 1      | 32  | >16     | 32    | <=1 <i>C. jejuni</i> |
| 2016 | 16-CA00794 | Broiler_caecum_content | EUCAMP2             | 0,5     | 2      | 64  | >16     | >64   | <=1 <i>C. jejuni</i> |
| 2016 | 16-CA00795 | Broiler_caecum_content | EUCAMP2             | 0,5     | 2      | 64  | >16     | >64   | 2 <i>C. coli</i>     |
| 2016 | 16-CA00797 | Turkey_caecum_content  | EUCAMP2             | <=0,125 | 0,5    | 32  | >16     | 64    | 2 <i>C. jejuni</i>   |
| 2016 | 16-CA00798 | Turkey_caecum_content  | EUCAMP2             | 0,25    | 0,5    | 32  | 16      | 64    | <=1 <i>C. coli</i>   |
| 2016 | 16-CA00799 | Turkey_caecum_content  | EUCAMP2             | 0,5     | 2      | 64  | 16      | <=0,5 | <=1 <i>C. jejuni</i> |
| 2016 | 16-CA00800 | Turkey_caecum_content  | EUCAMP2             | 0,25    | 1      | 64  | >16     | <=0,5 | <=1 <i>C. jejuni</i> |
| 2016 | 16-CA00801 | Turkey_caecum_content  | EUCAMP2             | 0,5     | 2      | 64  | 16      | <=0,5 | <=1 <i>C. jejuni</i> |
| 2016 | 16-CA00802 | Turkey_caecum_content  | EUCAMP2             | 0,25    | 1      | 32  | 16      | 16    | <=1 <i>C. jejuni</i> |
| 2016 | 16-CA00803 | Turkey_caecum_content  | EUCAMP2             | 0,25    | 0,5    | 32  | >16     | >64   | <=1 <i>C. jejuni</i> |
| 2016 | 16-CA00804 | Turkey_caecum_content  | EUCAMP2             | <=0,125 | <=0,25 | 32  | 8       | 32    | <=1 <i>C. jejuni</i> |
| 2016 | 16-CA00805 | Turkey_caecum_content  | EUCAMP2             | 1       | 2      | 64  | 16      | <=0,5 | <=1 <i>C. jejuni</i> |
| 2016 | 16-CA00806 | Turkey_caecum_content  | EUCAMP2             | 0,5     | 2      | 4   | <=0,125 | <=0,5 | <=1 <i>C. jejuni</i> |
| 2016 | 16-CA00807 | Turkey_caecum_content  | EUCAMP2             | 0,25    | 0,5    | 32  | 16      | 64    | <=1 <i>C. coli</i>   |
| 2016 | 16-CA00808 | Broiler_caecum_content | EUCAMP2             | 0,25    | 1      | 64  | >16     | >64   | <=1 <i>C. jejuni</i> |
| 2016 | 16-CA00809 | Broiler_caecum_content | EUCAMP2             | 0,5     | 2      | 64  | 16      | <=0,5 | <=1 <i>C. jejuni</i> |

Table S5: Minimum inhibitory concentrations of 6 antimicrobials for isolats of *C. jejuni* and *C. coli* from poultry

| Year | Sample No. | Matrix_final           | Antimicrobial panel | GEN     | STR    | NAL | CIP  | TET   | ERY | Species          |
|------|------------|------------------------|---------------------|---------|--------|-----|------|-------|-----|------------------|
| 2016 | 16-CA00810 | Broiler_caecum_content | EUCAMP2             | <=0,125 | <=0,25 | 16  | 16   | 16    | <=1 | <i>C. jejuni</i> |
| 2016 | 16-CA00811 | Broiler_caecum_content | EUCAMP2             | 0,5     | 1      | 64  | >16  | >64   | <=1 | <i>C. jejuni</i> |
| 2016 | 16-CA00812 | Broiler_caecum_content | EUCAMP2             | 0,25    | 1      | 32  | 8    | 8     | <=1 | <i>C. coli</i>   |
| 2016 | 16-CA00813 | Turkey_caecum_content  | EUCAMP2             | 0,5     | 1      | 64  | >16  | 2     | 2   | <i>C. coli</i>   |
| 2016 | 16-CA00814 | Turkey_caecum_content  | EUCAMP2             | 0,25    | 0,5    | 32  | 16   | 64    | <=1 | <i>C. jejuni</i> |
| 2016 | 16-CA00815 | Turkey_caecum_content  | EUCAMP2             | 0,5     | 2      | 4   | 0,25 | <=0,5 | <=1 | <i>C. jejuni</i> |
| 2016 | 16-CA00816 | Turkey_caecum_content  | EUCAMP2             | 0,5     | 2      | 64  | >16  | 2     | 2   | <i>C. coli</i>   |
| 2016 | 16-CA00817 | Turkey_caecum_content  | EUCAMP2             | 0,5     | 1      | 32  | >16  | >64   | <=1 | <i>C. jejuni</i> |
| 2016 | 16-CA00818 | Turkey_caecum_content  | EUCAMP2             | 0,25    | 2      | 32  | 16   | 32    | <=1 | <i>C. coli</i>   |
| 2016 | 16-CA00819 | Turkey_caecum_content  | EUCAMP2             | 0,5     | 1      | 4   | 0,25 | <=0,5 | <=1 | <i>C. jejuni</i> |
| 2016 | 16-CA00820 | Turkey_caecum_content  | EUCAMP2             | 0,5     | 1      | 64  | >16  | <=0,5 | <=1 | <i>C. jejuni</i> |
| 2016 | 16-CA00821 | Turkey_caecum_content  | EUCAMP2             | 0,25    | 1      | 32  | 8    | 16    | <=1 | <i>C. coli</i>   |
| 2016 | 16-CA00822 | Turkey_caecum_content  | EUCAMP2             | <=0,125 | 0,5    | 16  | >16  | 16    | <=1 | <i>C. jejuni</i> |
| 2016 | 16-CA00823 | Turkey_caecum_content  | EUCAMP2             | 0,5     | 1      | 4   | 0,25 | <=0,5 | <=1 | <i>C. jejuni</i> |
| 2016 | 16-CA00824 | Turkey_caecum_content  | EUCAMP2             | <=0,125 | 0,5    | 32  | >16  | <=0,5 | <=1 | <i>C. jejuni</i> |
| 2016 | 16-CA00825 | Turkey_caecum_content  | EUCAMP2             | <=0,125 | 0,5    | 32  | >16  | 16    | <=1 | <i>C. jejuni</i> |
| 2016 | 16-CA00826 | Turkey_caecum_content  | EUCAMP2             | 0,5     | 1      | 4   | 0,25 | 4     | <=1 | <i>C. jejuni</i> |
| 2016 | 16-CA00827 | Turkey_caecum_content  | EUCAMP2             | 0,25    | 1      | 32  | >16  | >64   | <=1 | <i>C. jejuni</i> |
| 2016 | 16-CA00828 | Broiler_caecum_content | EUCAMP2             | 0,25    | 0,5    | 32  | >16  | 64    | <=1 | <i>C. jejuni</i> |
| 2016 | 16-CA00829 | Broiler_caecum_content | EUCAMP2             | 0,5     | 1      | 64  | >16  | >64   | 2   | <i>C. jejuni</i> |
| 2016 | 16-CA00830 | Turkey_caecum_content  | EUCAMP2             | 0,25    | 2      | >64 | >16  | >64   | 4   | <i>C. jejuni</i> |
| 2016 | 16-CA00831 | Turkey_caecum_content  | EUCAMP2             | 0,25    | 0,5    | 32  | 16   | 64    | 2   | <i>C. coli</i>   |
| 2016 | 16-CA00832 | Turkey_caecum_content  | EUCAMP2             | 0,5     | 1      | 4   | 0,25 | <=0,5 | <=1 | <i>C. jejuni</i> |
| 2016 | 16-CA00833 | Turkey_caecum_content  | EUCAMP2             | 0,5     | 1      | 32  | >16  | 32    | 4   | <i>C. coli</i>   |
| 2016 | 16-CA00834 | Turkey_caecum_content  | EUCAMP2             | 0,5     | 2      | 64  | >16  | 32    | 4   | <i>C. coli</i>   |
| 2016 | 16-CA00835 | Turkey_caecum_content  | EUCAMP2             | 0,25    | 0,5    | 32  | 8    | 16    | <=1 | <i>C. jejuni</i> |
| 2016 | 16-CA00836 | Turkey_caecum_content  | EUCAMP2             | <=0,125 | 0,5    | 32  | 16   | 64    | <=1 | <i>C. jejuni</i> |
| 2016 | 16-CA00837 | Turkey_caecum_content  | EUCAMP2             | 0,25    | 1      | 32  | >16  | 8     | <=1 | <i>C. jejuni</i> |
| 2016 | 16-CA00838 | Turkey_caecum_content  | EUCAMP2             | 0,25    | 0,5    | 32  | >16  | >64   | <=1 | <i>C. jejuni</i> |
| 2016 | 16-CA00839 | Turkey_caecum_content  | EUCAMP2             | 0,5     | 1      | 32  | >16  | 8     | <=1 | <i>C. jejuni</i> |
| 2016 | 16-CA00840 | Turkey_caecum_content  | EUCAMP2             | 0,5     | 2      | 32  | >16  | 32    | 4   | <i>C. coli</i>   |
| 2016 | 16-CA00841 | Broiler_caecum_content | EUCAMP2             | 0,25    | 0,5    | 32  | 16   | 16    | <=1 | <i>C. jejuni</i> |

Table S5: Minimum inhibitory concentrations of 6 antimicrobials for isolats of *C. jejuni* and *C. coli* from poultry

| Year | Sample No. | Matrix_final           | Antimicrobial panel | GEN     | STR    | NAL | CIP     | TET   | ERY | Species          |
|------|------------|------------------------|---------------------|---------|--------|-----|---------|-------|-----|------------------|
| 2016 | 16-CA00842 | Broiler_caecum_content | EUCAMP2             | 0,25    | 0,5    | 32  | 16      | 32    | <=1 | <i>C. jejuni</i> |
| 2016 | 16-CA00843 | Broiler_caecum_content | EUCAMP2             | 0,5     | 1      | 64  | 16      | 64    | <=1 | <i>C. jejuni</i> |
| 2016 | 16-CA00844 | Turkey_caecum_content  | EUCAMP2             | 0,5     | 2      | 8   | 0,5     | <=0,5 | 2   | <i>C. jejuni</i> |
| 2016 | 16-CA00845 | Turkey_caecum_content  | EUCAMP2             | <=0,125 | 1      | 32  | 16      | 32    | <=1 | <i>C. jejuni</i> |
| 2016 | 16-CA00846 | Turkey_caecum_content  | EUCAMP2             | 0,25    | 0,5    | 4   | <=0,125 | 16    | <=1 | <i>C. jejuni</i> |
| 2016 | 16-CA00847 | Turkey_caecum_content  | EUCAMP2             | 0,5     | 1      | 4   | 0,25    | <=0,5 | <=1 | <i>C. jejuni</i> |
| 2016 | 16-CA00848 | Turkey_caecum_content  | EUCAMP2             | 0,5     | 2      | 32  | 16      | <=0,5 | <=1 | <i>C. jejuni</i> |
| 2016 | 16-CA00849 | Turkey_caecum_content  | EUCAMP2             | 0,5     | 2      | 64  | >16     | >64   | 2   | <i>C. jejuni</i> |
| 2016 | 16-CA00850 | Turkey_caecum_content  | EUCAMP2             | 1       | 8      | 32  | >16     | 64    | 2   | <i>C. coli</i>   |
| 2016 | 16-CA00851 | Turkey_caecum_content  | EUCAMP2             | 0,25    | 0,5    | 2   | <=0,125 | <=0,5 | <=1 | <i>C. jejuni</i> |
| 2016 | 16-CA00852 | Turkey_caecum_content  | EUCAMP2             | 0,25    | 1      | 64  | >16     | >64   | 4   | <i>C. coli</i>   |
| 2016 | 16-CA00853 | Turkey_caecum_content  | EUCAMP2             | 0,5     | 2      | 64  | 16      | <=0,5 | <=1 | <i>C. jejuni</i> |
| 2016 | 16-CA00854 | Turkey_caecum_content  | EUCAMP2             | 0,5     | 1      | 32  | 16      | <=0,5 | <=1 | <i>C. coli</i>   |
| 2016 | 16-CA00855 | Broiler_caecum_content | EUCAMP2             | <=0,125 | 1      | 2   | <=0,125 | <=0,5 | <=1 | <i>C. jejuni</i> |
| 2016 | 16-CA00856 | Broiler_caecum_content | EUCAMP2             | 0,5     | 2      | 4   | 0,25    | <=0,5 | <=1 | <i>C. jejuni</i> |
| 2016 | 16-CA00857 | Broiler_caecum_content | EUCAMP2             | 1       | 2      | 4   | 0,5     | >64   | <=1 | <i>C. jejuni</i> |
| 2016 | 16-CA00858 | Turkey_caecum_content  | EUCAMP2             | <=0,125 | <=0,25 | 4   | 2       | 16    | 64  | <i>C. coli</i>   |
| 2016 | 16-CA00859 | Turkey_caecum_content  | EUCAMP2             | 1       | 2      | 8   | 0,25    | <=0,5 | <=1 | <i>C. jejuni</i> |
| 2016 | 16-CA00860 | Turkey_caecum_content  | EUCAMP2             | 0,5     | 1      | 64  | >16     | >64   | <=1 | <i>C. jejuni</i> |
| 2016 | 16-CA00861 | Turkey_caecum_content  | EUCAMP2             | 0,5     | 1      | 4   | <=0,125 | <=0,5 | <=1 | <i>C. jejuni</i> |
| 2016 | 16-CA00862 | Turkey_caecum_content  | EUCAMP2             | 0,25    | 2      | 64  | 16      | 64    | <=1 | <i>C. coli</i>   |
| 2016 | 16-CA00863 | Turkey_caecum_content  | EUCAMP2             | 0,25    | 1      | >64 | >16     | 1     | <=1 | <i>C. jejuni</i> |
| 2016 | 16-CA00864 | Turkey_caecum_content  | EUCAMP2             | 0,5     | >16    | 16  | 8       | 16    | 128 | <i>C. coli</i>   |
| 2016 | 16-CA00865 | Turkey_caecum_content  | EUCAMP2             | 0,5     | 0,5    | 4   | 0,25    | <=0,5 | <=1 | <i>C. jejuni</i> |
| 2016 | 16-CA00866 | Turkey_caecum_content  | EUCAMP2             | 0,25    | 1      | 16  | 8       | <=0,5 | <=1 | <i>C. coli</i>   |
| 2016 | 16-CA00867 | Turkey_caecum_content  | EUCAMP2             | 0,5     | 1      | 32  | 16      | 1     | <=1 | <i>C. coli</i>   |
| 2016 | 16-CA00868 | Turkey_caecum_content  | EUCAMP2             | 0,5     | 1      | 32  | 16      | 16    | <=1 | <i>C. coli</i>   |
| 2016 | 16-CA00869 | Turkey_caecum_content  | EUCAMP2             | 0,5     | 1      | 32  | >16     | >64   | <=1 | <i>C. jejuni</i> |
| 2016 | 16-CA00870 | Turkey_caecum_content  | EUCAMP2             | 0,5     | 1      | 4   | 1       | 32    | 2   | <i>C. jejuni</i> |
| 2016 | 16-CA00871 | Turkey_caecum_content  | EUCAMP2             | 0,5     | 1      | 32  | >16     | >64   | <=1 | <i>C. jejuni</i> |
| 2016 | 16-CA00872 | Turkey_caecum_content  | EUCAMP2             | 0,25    | 0,5    | 32  | >16     | <=0,5 | <=1 | <i>C. jejuni</i> |
| 2016 | 16-CA00896 | Broiler_caecum_content | EUCAMP2             | 0,5     | 1      | 64  | 8       | <=0,5 | <=1 | <i>C. jejuni</i> |

Table S5: Minimum inhibitory concentrations of 6 antimicrobials for isolats of *C. jejuni* and *C. coli* from poultry

| Year | Sample No. | Matrix_final           | Antimicrobial panel | GEN  | STR | NAL | CIP     | TET   | ERY  | Species          |
|------|------------|------------------------|---------------------|------|-----|-----|---------|-------|------|------------------|
| 2016 | 16-CA00897 | Broiler_caecum_content | EUCAMP2             | 0,25 | 0,5 | 32  | 16      | 64    | <=1  | <i>C. jejuni</i> |
| 2016 | 16-CA00901 | Broiler_caecum_content | EUCAMP2             | 0,5  | 2   | 64  | 16      | <=0,5 | <=1  | <i>C. jejuni</i> |
| 2016 | 16-CA00923 | Broiler_caecum_content | EUCAMP2             | 0,5  | 1   | 32  | 16      | 64    | <=1  | <i>C. jejuni</i> |
| 2016 | 16-CA00952 | Broiler_caecum_content | EUCAMP2             | 0,5  | 2   | 32  | >16     | 32    | 2    | <i>C. coli</i>   |
| 2016 | 16-CA00953 | Broiler_caecum_content | EUCAMP2             | 1    | 4   | 64  | 16      | 4     | <=1  | <i>C. coli</i>   |
| 2016 | 16-CA00954 | Broiler_caecum_content | EUCAMP2             | 0,5  | 2   | 4   | 0,25    | <=0,5 | <=1  | <i>C. jejuni</i> |
| 2016 | 16-CA00965 | Broiler_caecum_content | EUCAMP2             | 0,5  | 2   | 64  | >16     | >64   | <=1  | <i>C. jejuni</i> |
| 2016 | 16-CA00967 | Broiler_caecum_content | EUCAMP2             | 0,25 | 1   | 64  | 16      | >64   | <=1  | <i>C. jejuni</i> |
| 2016 | 16-CA00975 | Broiler_caecum_content | EUCAMP2             | 0,5  | 1   | 32  | 16      | >64   | <=1  | <i>C. jejuni</i> |
| 2016 | 16-CA00976 | Broiler_caecum_content | EUCAMP2             | 0,25 | 1   | 32  | 16      | 32    | <=1  | <i>C. jejuni</i> |
| 2016 | 16-CA00986 | Broiler_caecum_content | EUCAMP2             | 0,5  | 1   | 4   | <=0,125 | <=0,5 | <=1  | <i>C. jejuni</i> |
| 2016 | 16-CA00987 | Broiler_caecum_content | EUCAMP2             | 0,5  | 2   | 64  | 16      | <=0,5 | <=1  | <i>C. jejuni</i> |
| 2016 | 16-CA00991 | Turkey_caecum_content  | EUCAMP2             | 0,25 | 1   | 32  | 16      | 32    | <=1  | <i>C. jejuni</i> |
| 2016 | 16-CA01008 | Broiler_caecum_content | EUCAMP2             | 1    | 1   | >64 | >16     | <=0,5 | <=1  | <i>C. jejuni</i> |
| 2016 | 16-CA01010 | Broiler_caecum_content | EUCAMP2             | 0,5  | 1   | 4   | <=0,125 | 1     | <=1  | <i>C. jejuni</i> |
| 2016 | 16-CA01011 | Turkey_caecum_content  | EUCAMP2             | 0,25 | 1   | 32  | 16      | 64    | <=1  | <i>C. jejuni</i> |
| 2016 | 16-CA01012 | Broiler_caecum_content | EUCAMP2             | 8    | 16  | 32  | 8       | 32    | <=1  | <i>C. jejuni</i> |
| 2016 | 16-CA01013 | Broiler_caecum_content | EUCAMP2             | 0,5  | 2   | 32  | 16      | 64    | <=1  | <i>C. jejuni</i> |
| 2016 | 16-CA01014 | Broiler_caecum_content | EUCAMP2             | 1    | 2   | 2   | <=0,125 | <=0,5 | <=1  | <i>C. jejuni</i> |
| 2016 | 16-CA01021 | Turkey_caecum_content  | EUCAMP2             | 0,5  | 1   | 4   | 0,25    | <=0,5 | <=1  | <i>C. jejuni</i> |
| 2016 | 16-CA01022 | Turkey_caecum_content  | EUCAMP2             | 0,25 | 1   | 32  | 16      | 64    | <=1  | <i>C. jejuni</i> |
| 2016 | 16-CA01023 | Turkey_caecum_content  | EUCAMP2             | 1    | 2   | 4   | 0,25    | <=0,5 | <=1  | <i>C. jejuni</i> |
| 2016 | 16-CA01024 | Turkey_caecum_content  | EUCAMP2             | 0,5  | 1   | 4   | 0,25    | <=0,5 | <=1  | <i>C. coli</i>   |
| 2016 | 16-CA01025 | Turkey_caecum_content  | EUCAMP2             | 0,5  | >16 | 32  | 16      | 64    | >128 | <i>C. coli</i>   |
| 2016 | 16-CA01026 | Broiler_caecum_content | EUCAMP2             | 1    | 2   | 4   | 0,5     | <=0,5 | <=1  | <i>C. jejuni</i> |
| 2016 | 16-CA01027 | Broiler_caecum_content | EUCAMP2             | 0,5  | 1   | 64  | 8       | <=0,5 | <=1  | <i>C. jejuni</i> |
| 2016 | 16-CA01028 | Turkey_caecum_content  | EUCAMP2             | 0,5  | 1   | 8   | 0,5     | >64   | <=1  | <i>C. jejuni</i> |
| 2016 | 16-CA01029 | Turkey_caecum_content  | EUCAMP2             | 0,5  | 1   | 64  | >16     | >64   | <=1  | <i>C. jejuni</i> |
| 2016 | 16-CA01030 | Turkey_caecum_content  | EUCAMP2             | 0,5  | 2   | 64  | >16     | <=0,5 | <=1  | <i>C. coli</i>   |
| 2016 | 16-CA01031 | Turkey_caecum_content  | EUCAMP2             | 0,5  | 1   | 32  | 16      | <=0,5 | <=1  | <i>C. jejuni</i> |
| 2016 | 16-CA01032 | Turkey_caecum_content  | EUCAMP2             | 0,25 | 1   | 64  | >16     | >64   | 4    | <i>C. coli</i>   |
| 2016 | 16-CA01033 | Turkey_caecum_content  | EUCAMP2             | 0,25 | 0,5 | 32  | >16     | 64    | <=1  | <i>C. jejuni</i> |

Table S5: Minimum inhibitory concentrations of 6 antimicrobials for isolats of *C. jejuni* and *C. coli* from poultry

| Year | Sample No. | Matrix_final           | Antimicrobial panel | GEN     | STR    | NAL    | CIP        | TET    | ERY Species   |
|------|------------|------------------------|---------------------|---------|--------|--------|------------|--------|---------------|
| 2016 | 16-CA01034 | Turkey_caecum_content  | EUCAMP2             | 0,5     | 1      | 4      | 0,25       | <=0,5  | <=1 C. jejuni |
| 2016 | 16-CA01035 | Turkey_caecum_content  | EUCAMP2             | 1       | 1      | 64     | 16 >64     | <=1    | C. jejuni     |
| 2016 | 16-CA01036 | Turkey_caecum_content  | EUCAMP2             | 0,5     | 1      | 64     | 16         | 32     | 2 C. jejuni   |
| 2016 | 16-CA01037 | Turkey_caecum_content  | EUCAMP2             | 0,5     | 1      | 32     | >16        | >64    | <=1 C. jejuni |
| 2016 | 16-CA01038 | Turkey_caecum_content  | EUCAMP2             | 0,5     | 1      | >64    | >16        | <=0,5  | 2 C. jejuni   |
| 2016 | 16-CA01039 | Turkey_caecum_content  | EUCAMP2             | 1       | 2 >64  |        | 16 >64     | <=1    | C. jejuni     |
| 2016 | 16-CA01040 | Turkey_caecum_content  | EUCAMP2             | 1       | 2      | 4      | 0,25 <=0,5 | <=1    | C. jejuni     |
| 2016 | 16-CA01041 | Turkey_caecum_content  | EUCAMP2             | 0,5     | 1      | 4      | 0,5        | >64    | <=1 C. jejuni |
| 2016 | 16-CA01042 | Turkey_caecum_content  | EUCAMP2             | 0,5     | 1      | >64    | >16        | >64    | 2 C. jejuni   |
| 2016 | 16-CA01043 | Broiler_caecum_content | EUCAMP2             | 0,25    | 0,5    | 64     | 16 <=0,5   | <=1    | C. jejuni     |
| 2016 | 16-CA01044 | Broiler_caecum_content | EUCAMP2             | 0,5     | 1      | 4      | 0,25       | <=0,5  | <=1 C. jejuni |
| 2016 | 16-CA01045 | Broiler_caecum_content | EUCAMP2             | 0,5     | 1      | 4      | 0,25       | <=0,5  | <=1 C. jejuni |
| 2016 | 16-CA01046 | Broiler_caecum_content | EUCAMP2             | <=0,125 | <=0,25 | 32     | 16 <=0,5   | <=1    | C. jejuni     |
| 2016 | 16-CA01060 | Broiler_caecum_content | EUCAMP2             | 0,25    | 1      | 64 >16 |            | 64     | 2 C. coli     |
| 2016 | 16-CA01061 | Broiler_caecum_content | EUCAMP2             | 0,5     | 1      | 4      | 0,25       | <=0,5  | <=1 C. jejuni |
| 2016 | 16-CA01083 | Broiler_caecum_content | EUCAMP2             | 1       | 2      | 4      | 0,25 <=0,5 | <=1    | C. jejuni     |
| 2016 | 16-CA01107 | Broiler_caecum_content | EUCAMP2             | 0,5     | 1      | 64     | 16         | 64     | <=1 C. jejuni |
| 2016 | 16-CA01124 | Broiler_caecum_content | EUCAMP2             | 0,5     | 1      | 64     | 16         | 64     | <=1 C. jejuni |
| 2016 | 16-CA01125 | Broiler_caecum_content | EUCAMP2             | 0,25    | 0,5    | 32     | 16         | 16 <=1 | C. jejuni     |
| 2016 | 16-CA01126 | Broiler_caecum_content | EUCAMP2             | 0,25    | 2      | 32     | 16         | 32 <=1 | C. coli       |
| 2016 | 16-CA01127 | Broiler_caecum_content | EUCAMP2             | 0,5     | 1      | 32     | 16         | 32     | <=1 C. coli   |
| 2016 | 16-CA01128 | Turkey_caecum_content  | EUCAMP2             | 0,25    | 1      | 32     | 16         | 16 <=1 | C. coli       |
| 2016 | 16-CA01129 | Turkey_caecum_content  | EUCAMP2             | 0,5     | 1      | <=1    | 16         | <=0,5  | <=1 C. jejuni |
| 2016 | 16-CA01130 | Turkey_caecum_content  | EUCAMP2             | 0,25    | 0,5    | 32     | 16         | 32 <=1 | C. jejuni     |
| 2016 | 16-CA01131 | Turkey_caecum_content  | EUCAMP2             | 0,25    | 1      | 32     | 16         | 32     | 2 C. coli     |
| 2016 | 16-CA01132 | Turkey_caecum_content  | EUCAMP2             | 0,5     | 2      | 64     | 16         | 64     | <=1 C. jejuni |
| 2016 | 16-CA01133 | Turkey_caecum_content  | EUCAMP2             | 0,25    | 4      | 32     | 4          | 8 <=1  | C. coli       |
| 2016 | 16-CA01134 | Turkey_caecum_content  | EUCAMP2             | 0,25    | 1      | 32 >16 | <=0,5      | <=1    | C. jejuni     |
| 2016 | 16-CA01135 | Broiler_caecum_content | EUCAMP2             | 0,5     | 2      | 4      | 0,25       | <=0,5  | <=1 C. jejuni |
| 2016 | 16-CA01136 | Broiler_caecum_content | EUCAMP2             | 0,5     | 2      | 64     | >16        | >64    | <=1 C. jejuni |
| 2016 | 16-CA01137 | Broiler_caecum_content | EUCAMP2             | 0,5     | 1      | 64     | >16        | 64     | <=1 C. jejuni |
| 2016 | 16-CA01138 | Broiler_caecum_content | EUCAMP2             | 0,25    | 1      | 16     | 8          | 16 <=1 | C. coli       |



Table S5: Minimum inhibitory concentrations of 6 antimicrobials for isolats of *C. jejuni* and *C. coli* from poultry

| Year | Sample No. | Matrix_final           | Antimicrobial panel | GEN     | STR    | NAL | CIP     | TET   | ERY Species          |
|------|------------|------------------------|---------------------|---------|--------|-----|---------|-------|----------------------|
| 2016 | 16-CA01139 | Turkey_caecum_content  | EUCAMP2             | 0,5     | 1      | 64  | >16     | 64    | <=1 <i>C. jejuni</i> |
| 2016 | 16-CA01140 | Turkey_caecum_content  | EUCAMP2             | 0,25    | 2      | 32  | 16      | 16    | <=1 <i>C. coli</i>   |
| 2016 | 16-CA01141 | Turkey_caecum_content  | EUCAMP2             | 0,25    | 0,5    | 32  | 16      | 64    | <=1 <i>C. jejuni</i> |
| 2016 | 16-CA01142 | Turkey_caecum_content  | EUCAMP2             | 0,25    | 1      | 32  | 16      | 16    | <=1 <i>C. coli</i>   |
| 2016 | 16-CA01143 | Turkey_caecum_content  | EUCAMP2             | 0,5     | 2      | 64  | >16     | >64   | <=1 <i>C. jejuni</i> |
| 2016 | 16-CA01144 | Turkey_caecum_content  | EUCAMP2             | 0,25    | 1      | 32  | >16     | >64   | <=1 <i>C. jejuni</i> |
| 2016 | 16-CA01145 | Turkey_caecum_content  | EUCAMP2             | 0,5     | 1      | 64  | >16     | >64   | 2 <i>C. jejuni</i>   |
| 2016 | 16-CA01146 | Turkey_caecum_content  | EUCAMP2             | 0,5     | 1      | 64  | >16     | >64   | 2 <i>C. jejuni</i>   |
| 2016 | 16-CA01147 | Broiler_caecum_content | EUCAMP2             | 0,25    | 1      | 2   | <=0,125 | <=0,5 | <=1 <i>C. jejuni</i> |
| 2016 | 16-CA01148 | Broiler_caecum_content | EUCAMP2             | <=0,125 | 0,5    | 16  | 8       | 32    | <=1 <i>C. jejuni</i> |
| 2016 | 16-CA01149 | Broiler_caecum_content | EUCAMP2             | 0,25    | 1      | 4   | <=0,125 | <=0,5 | <=1 <i>C. jejuni</i> |
| 2016 | 16-CA01150 | Turkey_caecum_content  | EUCAMP2             | 0,5     | 1      | 64  | >16     | >64   | 2 <i>C. jejuni</i>   |
| 2016 | 16-CA01151 | Turkey_caecum_content  | EUCAMP2             | 0,5     | 1      | 32  | >16     | >64   | 2 <i>C. jejuni</i>   |
| 2016 | 16-CA01152 | Turkey_caecum_content  | EUCAMP2             | <=0,125 | <=0,25 | 32  | 16      | 32    | <=1 <i>C. jejuni</i> |
| 2016 | 16-CA01153 | Turkey_caecum_content  | EUCAMP2             | 0,5     | 2      | 64  | >16     | >64   | <=1 <i>C. jejuni</i> |
| 2016 | 16-CA01154 | Turkey_caecum_content  | EUCAMP2             | 0,5     | 8      | 32  | 16      | 64    | >128 <i>C. coli</i>  |
| 2016 | 16-CA01155 | Turkey_caecum_content  | EUCAMP2             | 0,25    | 0,5    | 64  | 16      | 64    | <=1 <i>C. jejuni</i> |
| 2016 | 16-CA01156 | Turkey_caecum_content  | EUCAMP2             | 0,5     | 2      | 64  | >16     | >64   | <=1 <i>C. coli</i>   |
| 2016 | 16-CA01157 | Turkey_caecum_content  | EUCAMP2             | 0,5     | 2      | 64  | 16      | 64    | <=1 <i>C. coli</i>   |
| 2016 | 16-CA01158 | Turkey_caecum_content  | EUCAMP2             | 0,5     | 1      | 32  | 8       | <=0,5 | <=1 <i>C. jejuni</i> |
| 2016 | 16-CA01159 | Turkey_caecum_content  | EUCAMP2             | 0,25    | 1      | 32  | 16      | 64    | 2 <i>C. coli</i>     |
| 2016 | 16-CA01160 | Turkey_caecum_content  | EUCAMP2             | 0,5     | 1      | 32  | >16     | 16    | 2 <i>C. coli</i>     |
| 2016 | 16-CA01161 | Broiler_caecum_content | EUCAMP2             | 0,25    | 1      | 32  | 16      | 32    | <=1 <i>C. coli</i>   |
| 2016 | 16-CA01162 | Broiler_caecum_content | EUCAMP2             | 1       | 2      | 64  | 16      | 64    | <=1 <i>C. coli</i>   |
| 2016 | 16-CA01163 | Turkey_caecum_content  | EUCAMP2             | 0,5     | 2      | 32  | 16      | 64    | >128 <i>C. coli</i>  |
| 2016 | 16-CA01164 | Turkey_caecum_content  | EUCAMP2             | 0,5     | 1      | 4   | 0,25    | 64    | <=1 <i>C. jejuni</i> |
| 2016 | 16-CA01165 | Turkey_caecum_content  | EUCAMP2             | 0,5     | 1      | 64  | >16     | >64   | <=1 <i>C. jejuni</i> |
| 2016 | 16-CA01166 | Turkey_caecum_content  | EUCAMP2             | <=0,125 | <=0,25 | 32  | 16      | 8     | <=1 <i>C. jejuni</i> |
| 2016 | 16-CA01167 | Turkey_caecum_content  | EUCAMP2             | <=0,125 | 2      | 32  | 16      | 64    | 2 <i>C. coli</i>     |
| 2016 | 16-CA01168 | Turkey_caecum_content  | EUCAMP2             | 1       | 2      | 64  | 16      | <=0,5 | <=1 <i>C. jejuni</i> |
| 2016 | 16-CA01169 | Turkey_caecum_content  | EUCAMP2             | 0,5     | 1      | 32  | 16      | 32    | <=1 <i>C. jejuni</i> |
| 2016 | 16-CA01170 | Turkey_caecum_content  | EUCAMP2             | 0,25    | 1      | 4   | 0,25    | <=0,5 | <=1 <i>C. jejuni</i> |

Table S5: Minimum inhibitory concentrations of 6 antimicrobials for isolats of *C. jejuni* and *C. coli* from poultry

| Year | Sample No. | Matrix_final           | Antimicrobial panel | GEN     | STR | NAL | CIP     | TET   | ERY Species   |
|------|------------|------------------------|---------------------|---------|-----|-----|---------|-------|---------------|
| 2016 | 16-CA01171 | Turkey_caecum_content  | EUCAMP2             | 0,5     | 1   | 32  | 16      | 32    | <=1 C. coli   |
| 2016 | 16-CA01172 | Turkey_caecum_content  | EUCAMP2             | 1       | 8   | 8   | 0,5     | <=0,5 | 4 C. coli     |
| 2016 | 16-CA01173 | Broiler_caecum_content | EUCAMP2             | 0,5     | 1   | 32  | 16      | <=0,5 | <=1 C. jejuni |
| 2016 | 16-CA01174 | Broiler_caecum_content | EUCAMP2             | 0,5     | 1   | 64  | >16     | >64   | 2 C. jejuni   |
| 2016 | 16-CA01175 | Broiler_caecum_content | EUCAMP2             | 0,5     | 2   | 32  | 8       | 16    | <=1 C. coli   |
| 2016 | 16-CA01176 | Broiler_caecum_content | EUCAMP2             | 0,5     | 2   | 2   | <=0,125 | 8     | <=1 C. coli   |
| 2016 | 16-CA01177 | Broiler_caecum_content | EUCAMP2             | 0,5     | 1   | 64  | >16     | 64    | <=1 C. jejuni |
| 2016 | 16-CA01178 | Broiler_caecum_content | EUCAMP2             | 0,25    | 1   | 64  | 16      | >64   | <=1 C. jejuni |
| 2016 | 16-CA01179 | Broiler_caecum_content | EUCAMP2             | 0,25    | 0,5 | 32  | 8       | <=0,5 | <=1 C. jejuni |
| 2016 | 16-CA01180 | Broiler_caecum_content | EUCAMP2             | 0,25    | 1   | 32  | 16      | 32    | 2 C. coli     |
| 2016 | 16-CA01181 | Turkey_caecum_content  | EUCAMP2             | 0,5     | 2   | 32  | 16      | 16    | <=1 C. coli   |
| 2016 | 16-CA01182 | Turkey_caecum_content  | EUCAMP2             | 0,5     | 1   | 32  | 16      | 16    | >128 C. coli  |
| 2016 | 16-CA01183 | Turkey_caecum_content  | EUCAMP2             | 0,25    | 1   | 64  | >16     | >64   | 2 C. jejuni   |
| 2016 | 16-CA01184 | Turkey_caecum_content  | EUCAMP2             | 0,25    | 0,5 | 8   | 4       | 4     | <=1 C. jejuni |
| 2016 | 16-CA01185 | Turkey_caecum_content  | EUCAMP2             | 0,25    | 1   | 32  | 16      | 32    | 2 C. coli     |
| 2016 | 16-CA01186 | Turkey_caecum_content  | EUCAMP2             | 0,25    | 1   | 4   | 0,25    | <=0,5 | <=1 C. coli   |
| 2016 | 16-CA01187 | Turkey_caecum_content  | EUCAMP2             | 0,25    | 1   | 32  | 16      | 16    | <=1 C. coli   |
| 2016 | 16-CA01188 | Turkey_caecum_content  | EUCAMP2             | 0,5     | >16 | 64  | 8       | 32    | <=1 C. coli   |
| 2016 | 16-CA01189 | Turkey_caecum_content  | EUCAMP2             | 0,25    | 0,5 | 32  | 16      | 32    | <=1 C. jejuni |
| 2016 | 16-CA01190 | Turkey_caecum_content  | EUCAMP2             | 0,5     | 1   | 32  | 16      | 64    | <=1 C. jejuni |
| 2016 | 16-CA01191 | Turkey_caecum_content  | EUCAMP2             | 0,25    | 1   | 32  | 4       | 8     | <=1 C. coli   |
| 2016 | 16-CA01192 | Turkey_caecum_content  | EUCAMP2             | 0,5     | 2   | 4   | 0,25    | <=0,5 | <=1 C. jejuni |
| 2016 | 16-CA01207 | Broiler_caecum_content | EUCAMP2             | <=0,125 | >16 | 2   | >16     | 64    | <=1 C. jejuni |
| 2016 | 16-CA01208 | Broiler_caecum_content | EUCAMP2             | 0,5     | 2   | 64  | 16      | 64    | <=1 C. coli   |
| 2016 | 16-CA01208 | Broiler_caecum_content | EUCAMP2             | 0,25    | 0,5 | 32  | 16      | 32    | <=1 C. jejuni |
| 2016 | 16-CA01209 | Broiler_caecum_content | EUCAMP2             | 0,5     | 2   | 64  | >16     | >64   | <=1 C. jejuni |
| 2016 | 16-CA01210 | Broiler_caecum_content | EUCAMP2             | 0,5     | 1   | 2   | <=0,125 | <=0,5 | <=1 C. jejuni |
| 2016 | 16-CA01211 | Broiler_caecum_content | EUCAMP2             | 0,5     | 1   | 32  | 16      | 32    | <=1 C. jejuni |
| 2016 | 16-CA01216 | Broiler_caecum_content | EUCAMP2             | 0,5     | 2   | 4   | <=0,125 | <=0,5 | <=1 C. jejuni |
| 2016 | 16-CA01220 | Turkey_caecum_content  | EUCAMP2             | 0,5     | 1   | 32  | >16     | 64    | 2 C. coli     |
| 2016 | 16-CA01221 | Turkey_caecum_content  | EUCAMP2             | 0,25    | 1   | 64  | >16     | <=0,5 | <=1 C. jejuni |
| 2016 | 16-CA01222 | Turkey_caecum_content  | EUCAMP2             | 0,5     | 2   | 32  | 16      | <=0,5 | <=1 C. jejuni |

Table S5: Minimum inhibitory concentrations of 6 antimicrobials for isolats of *C. jejuni* and *C. coli* from poultry

| Year | Sample No. | Matrix_final           | Antimicrobial panel | GEN  | STR | NAL    | CIP     | TET   | ERY Species          |
|------|------------|------------------------|---------------------|------|-----|--------|---------|-------|----------------------|
| 2016 | 16-CA01223 | Turkey_caecum_content  | EUCAMP2             | 1    | 8   | 64 >16 |         | 64    | 2 <i>C. coli</i>     |
| 2016 | 16-CA01240 | Turkey_caecum_content  | EUCAMP2             | 0,5  | 1   | 32     | >16     | >64   | <=1 <i>C. jejuni</i> |
| 2016 | 16-CA01241 | Turkey_caecum_content  | EUCAMP2             | 0,25 | >16 | 32     | 16      | <=0,5 | <=1 <i>C. jejuni</i> |
| 2016 | 16-CA01268 | Broiler_caecum_content | EUCAMP2             | 0,5  | >16 | 16     | 8       | 4     | <=1 <i>C. coli</i>   |
| 2016 | 16-CA01269 | Broiler_caecum_content | EUCAMP2             | 0,25 | 1   | 64     | 8       | <=0,5 | <=1 <i>C. jejuni</i> |
| 2016 | 16-CA01270 | Broiler_caecum_content | EUCAMP2             | 0,5  | 1   | 4      | <=0,125 | <=0,5 | <=1 <i>C. jejuni</i> |
| 2016 | 16-CA01276 | Broiler_caecum_content | EUCAMP2             | 0,5  | 1   | 64     | 8       | <=0,5 | <=1 <i>C. jejuni</i> |
| 2016 | 16-CA01277 | Broiler_caecum_content | EUCAMP2             | 0,5  | 2   | 64     | 16      | 32    | <=1 <i>C. jejuni</i> |
| 2016 | 16-CA01279 | Broiler_caecum_content | EUCAMP2             | 0,5  | 1   | 64     | 16      | <=0,5 | <=1 <i>C. jejuni</i> |
| 2016 | 16-CA01280 | Broiler_caecum_content | EUCAMP2             | 0,5  | 2   | 64     | >16     | >64   | 2 <i>C. jejuni</i>   |
| 2016 | 16-CA01281 | Broiler_caecum_content | EUCAMP2             | 1    | 8   | >64    | 16      | <=0,5 | <=1 <i>C. jejuni</i> |
| 2016 | 16-CA01282 | Turkey_caecum_content  | EUCAMP2             | 0,5  | 1   | 32     | 4       | <=0,5 | <=1 <i>C. coli</i>   |
| 2016 | 16-CA01292 | Broiler_caecum_content | EUCAMP2             | 0,5  | >16 | 64     | 8       | <=0,5 | <=1 <i>C. jejuni</i> |
| 2016 | 16-CA01293 | Broiler_caecum_content | EUCAMP2             | 0,5  | 1   | 4      | <=0,125 | <=0,5 | <=1 <i>C. jejuni</i> |
| 2016 | 16-CA01294 | Turkey_caecum_content  | EUCAMP2             | 0,5  | 2   | 16     | 8       | 64    | <=1 <i>C. coli</i>   |
| 2016 | 16-CA01295 | Broiler_caecum_content | EUCAMP2             | 0,5  | >16 | 64     | 16      | >64   | <=1 <i>C. jejuni</i> |
| 2016 | 16-CA01297 | Turkey_caecum_content  | EUCAMP2             | 0,5  | 1   | 32     | 16      | 32    | <=1 <i>C. jejuni</i> |
| 2016 | 16-CA01298 | Turkey_caecum_content  | EUCAMP2             | 0,5  | >16 | 32     | 8       | 8     | <=1 <i>C. coli</i>   |
| 2016 | 16-CA01299 | Turkey_caecum_content  | EUCAMP2             | 0,5  | 1   | 64     | >16     | <=0,5 | <=1 <i>C. jejuni</i> |
| 2016 | 16-CA01300 | Turkey_caecum_content  | EUCAMP2             | 1    | 2   | 4      | 0,25    | <=0,5 | <=1 <i>C. jejuni</i> |
| 2016 | 16-CA01301 | Turkey_caecum_content  | EUCAMP2             | 0,25 | 1   | 32     | 8       | 16    | 2 <i>C. coli</i>     |
| 2016 | 16-CA01302 | Turkey_caecum_content  | EUCAMP2             | 0,5  | 1   | 32     | 16      | 64    | <=1 <i>C. jejuni</i> |
| 2016 | 16-CA01303 | Turkey_caecum_content  | EUCAMP2             | 0,5  | 1   | 32     | 16      | 32    | <=1 <i>C. jejuni</i> |
| 2016 | 16-CA01304 | Turkey_caecum_content  | EUCAMP2             | 0,5  | 1   | 32     | 16      | 32    | <=1 <i>C. jejuni</i> |
| 2016 | 16-CA01305 | Turkey_caecum_content  | EUCAMP2             | 0,25 | 0,5 | 32     | 16      | 32    | <=1 <i>C. jejuni</i> |
| 2016 | 16-CA01306 | Broiler_caecum_content | EUCAMP2             | 0,5  | 1   | 64     | >16     | >64   | 2 <i>C. jejuni</i>   |
| 2016 | 16-CA01307 | Broiler_caecum_content | EUCAMP2             | 0,25 | 1   | 64     | >16     | >64   | <=1 <i>C. jejuni</i> |
| 2016 | 16-CA01308 | Broiler_caecum_content | EUCAMP2             | 0,25 | 1   | 16     | 16      | 8     | >128 <i>C. coli</i>  |
| 2016 | 16-CA01309 | Turkey_caecum_content  | EUCAMP2             | 0,5  | 1   | 32     | 8       | <=0,5 | <=1 <i>C. coli</i>   |
| 2016 | 16-CA01310 | Turkey_caecum_content  | EUCAMP2             | 1    | 2   | 4      | 0,25    | <=0,5 | <=1 <i>C. jejuni</i> |
| 2016 | 16-CA01311 | Turkey_caecum_content  | EUCAMP2             | 0,25 | 1   | 32     | 16      | 32    | <=1 <i>C. coli</i>   |
| 2016 | 16-CA01312 | Turkey_caecum_content  | EUCAMP2             | 0,5  | 1   | 4      | <=0,125 | <=0,5 | <=1 <i>C. jejuni</i> |

Table S5: Minimum inhibitory concentrations of 6 antimicrobials for isolats of *C. jejuni* and *C. coli* from poultry

| Year | Sample No. | Matrix_final           | Antimicrobial panel | GEN     | STR | NAL | CIP  | TET   | ERY Species          |
|------|------------|------------------------|---------------------|---------|-----|-----|------|-------|----------------------|
| 2016 | 16-CA01313 | Turkey_caecum_content  | EUCAMP2             | 0,5     | 2   | 4   | 0,25 | <=0,5 | <=1 <i>C. jejuni</i> |
| 2016 | 16-CA01314 | Broiler_caecum_content | EUCAMP2             | 0,5     | 1   | 32  | 16   | 32    | 2 <i>C. jejuni</i>   |
| 2016 | 16-CA01315 | Broiler_caecum_content | EUCAMP2             | 0,5     | 2   | 32  | 16   | 64    | 2 <i>C. coli</i>     |
| 2016 | 16-CA01316 | Broiler_caecum_content | EUCAMP2             | 0,5     | 1   | 32  | 16   | 32    | <=1 <i>C. jejuni</i> |
| 2016 | 16-CA01317 | Turkey_caecum_content  | EUCAMP2             | 0,5     | >16 | 16  | 4    | 8     | <=1 <i>C. coli</i>   |
| 2016 | 16-CA01318 | Turkey_caecum_content  | EUCAMP2             | 0,5     | 1   | 16  | 8    | <=0,5 | >128 <i>C. coli</i>  |
| 2016 | 16-CA01319 | Turkey_caecum_content  | EUCAMP2             | 0,25    | >16 | 32  | 16   | 64    | >128 <i>C. coli</i>  |
| 2016 | 16-CA01320 | Turkey_caecum_content  | EUCAMP2             | 0,5     | 2   | 16  | 8    | <=0,5 | <=1 <i>C. coli</i>   |
| 2016 | 16-CA01321 | Turkey_caecum_content  | EUCAMP2             | 0,25    | 1   | 64  | >16  | >64   | <=1 <i>C. jejuni</i> |
| 2016 | 16-CA01322 | Turkey_caecum_content  | EUCAMP2             | 0,5     | 1   | 64  | 16   | >64   | <=1 <i>C. jejuni</i> |
| 2016 | 16-CA01323 | Turkey_caecum_content  | EUCAMP2             | 0,5     | 2   | 32  | 16   | 64    | <=1 <i>C. coli</i>   |
| 2016 | 16-CA01324 | Turkey_caecum_content  | EUCAMP2             | 0,5     | 2   | 64  | 16   | <=0,5 | <=1 <i>C. jejuni</i> |
| 2016 | 16-CA01325 | Broiler_caecum_content | EUCAMP2             | 0,5     | 1   | 32  | 16   | 64    | <=1 <i>C. jejuni</i> |
| 2016 | 16-CA01326 | Broiler_caecum_content | EUCAMP2             | 0,5     | 1   | 64  | 16   | 64    | <=1 <i>C. jejuni</i> |
| 2016 | 16-CA01327 | Broiler_caecum_content | EUCAMP2             | <=0,125 | 0,5 | 32  | >16  | 64    | <=1 <i>C. jejuni</i> |
| 2016 | 16-CA01328 | Broiler_caecum_content | EUCAMP2             | 0,5     | 1   | 64  | >16  | 64    | 2 <i>C. jejuni</i>   |
| 2016 | 16-CA01329 | Turkey_caecum_content  | EUCAMP2             | 0,25    | 1   | 32  | >16  | >64   | <=1 <i>C. jejuni</i> |
| 2016 | 16-CA01330 | Turkey_caecum_content  | EUCAMP2             | 0,5     | 1   | >64 | >16  | >64   | 2 <i>C. jejuni</i>   |
| 2016 | 16-CA01331 | Turkey_caecum_content  | EUCAMP2             | 0,5     | 1   | 32  | 16   | >64   | >128 <i>C. coli</i>  |
| 2016 | 16-CA01332 | Turkey_caecum_content  | EUCAMP2             | 0,5     | 1   | 64  | 16   | <=0,5 | <=1 <i>C. jejuni</i> |
| 2016 | 16-CA01333 | Turkey_caecum_content  | EUCAMP2             | 0,5     | 1   | 64  | >16  | <=0,5 | <=1 <i>C. jejuni</i> |
| 2016 | 16-CA01334 | Turkey_caecum_content  | EUCAMP2             | 0,5     | 1   | 64  | 16   | <=0,5 | 2 <i>C. coli</i>     |
| 2016 | 16-CA01335 | Turkey_caecum_content  | EUCAMP2             | <=0,125 | 0,5 | 64  | >16  | >64   | <=1 <i>C. jejuni</i> |
| 2016 | 16-CA01336 | Broiler_caecum_content | EUCAMP2             | 0,25    | 1   | 64  | >16  | >64   | <=1 <i>C. jejuni</i> |
| 2016 | 16-CA01337 | Broiler_caecum_content | EUCAMP2             | 0,5     | 2   | >64 | >16  | >64   | 2 <i>C. jejuni</i>   |
| 2016 | 16-CA01338 | Broiler_caecum_content | EUCAMP2             | 0,5     | 1   | 64  | >16  | >64   | <=1 <i>C. jejuni</i> |
| 2016 | 16-CA01339 | Broiler_caecum_content | EUCAMP2             | 0,5     | 1   | 64  | >16  | >64   | 2 <i>C. jejuni</i>   |
| 2016 | 16-CA01340 | Broiler_caecum_content | EUCAMP2             | 0,5     | 1   | 32  | 16   | 32    | <=1 <i>C. jejuni</i> |
| 2016 | 16-CA01341 | Broiler_caecum_content | EUCAMP2             | 0,5     | 1   | 64  | >16  | >64   | 2 <i>C. jejuni</i>   |
| 2016 | 16-CA01342 | Turkey_caecum_content  | EUCAMP2             | 0,5     | 1   | 32  | 8    | <=0,5 | <=1 <i>C. coli</i>   |
| 2016 | 16-CA01343 | Turkey_caecum_content  | EUCAMP2             | 0,5     | 1   | 32  | 16   | 32    | <=1 <i>C. jejuni</i> |
| 2016 | 16-CA01344 | Turkey_caecum_content  | EUCAMP2             | 0,5     | 1   | 64  | >16  | >64   | <=1 <i>C. jejuni</i> |

Table S5: Minimum inhibitory concentrations of 6 antimicrobials for isolats of *C. jejuni* and *C. coli* from poultry

| Year | Sample No. | Matrix_final           | Antimicrobial panel | GEN  | STR | NAL | CIP     | TET   | ERY | Species          |
|------|------------|------------------------|---------------------|------|-----|-----|---------|-------|-----|------------------|
| 2016 | 16-CA01345 | Turkey_caecum_content  | EUCAMP2             | 0,25 | 1   | 4   | 0,25    | <=0,5 | <=1 | <i>C. jejuni</i> |
| 2016 | 16-CA01346 | Turkey_caecum_content  | EUCAMP2             | 0,5  | 2   | 32  | 16      | 32    | <=1 | <i>C. coli</i>   |
| 2016 | 16-CA01347 | Turkey_caecum_content  | EUCAMP2             | 0,5  | 1   | 64  | >16     | >64   | <=1 | <i>C. jejuni</i> |
| 2016 | 16-CA01348 | Turkey_caecum_content  | EUCAMP2             | 0,5  | 2   | 64  | >16     | >64   | 4   | <i>C. coli</i>   |
| 2016 | 16-CA01349 | Turkey_caecum_content  | EUCAMP2             | 0,5  | 2   | >64 | 16      | 4     | <=1 | <i>C. coli</i>   |
| 2016 | 16-CA01350 | Broiler_caecum_content | EUCAMP2             | 0,5  | 1   | 64  | >16     | >64   | <=1 | <i>C. jejuni</i> |
| 2016 | 16-CA01351 | Broiler_caecum_content | EUCAMP2             | 0,5  | 1   | 32  | 16      | 32    | <=1 | <i>C. jejuni</i> |
| 2016 | 16-CA01352 | Broiler_caecum_content | EUCAMP2             | 0,25 | 0,5 | 32  | 16      | 16    | <=1 | <i>C. jejuni</i> |
| 2016 | 16-CA01353 | Broiler_caecum_content | EUCAMP2             | 0,5  | 2   | 4   | 0,25    | <=0,5 | <=1 | <i>C. jejuni</i> |
| 2016 | 16-CA01468 | Broiler_caecum_content | EUCAMP2             | 0,5  | 2   | 64  | 16      | 64    | <=1 | <i>C. coli</i>   |
| 2016 | 16-CA01469 | Broiler_caecum_content | EUCAMP2             | 0,5  | 2   | 64  | 16      | 64    | <=1 | <i>C. coli</i>   |
| 2016 | 16-CA01484 | Broiler_caecum_content | EUCAMP2             | 0,5  | 1   | 32  | 16      | 64    | <=1 | <i>C. jejuni</i> |
| 2016 | 16-CA01517 | Broiler_caecum_content | EUCAMP2             | 0,25 | 1   | 32  | 16      | 64    | <=1 | <i>C. jejuni</i> |
| 2016 | 16-CA01518 | Broiler_caecum_content | EUCAMP2             | 0,25 | 1   | 64  | 16      | 64    | <=1 | <i>C. jejuni</i> |
| 2016 | 16-CA01528 | Turkey_caecum_content  | EUCAMP2             | 0,25 | 1   | 32  | 16      | <=0,5 | <=1 | <i>C. jejuni</i> |
| 2016 | 16-CA01529 | Turkey_caecum_content  | EUCAMP2             | 0,25 | 1   | 64  | 8       | <=0,5 | <=1 | <i>C. coli</i>   |
| 2016 | 16-CA01530 | Turkey_caecum_content  | EUCAMP2             | 0,25 | 1   | 64  | >16     | <=0,5 | 2   | <i>C. jejuni</i> |
| 2016 | 16-CA01531 | Turkey_caecum_content  | EUCAMP2             | 0,5  | 1   | 4   | 0,25    | <=0,5 | <=1 | <i>C. jejuni</i> |
| 2016 | 16-CA01532 | Turkey_caecum_content  | EUCAMP2             | 0,5  | 1   | 32  | 16      | 64    | 2   | <i>C. coli</i>   |
| 2016 | 16-CA01533 | Turkey_caecum_content  | EUCAMP2             | 0,5  | 1   | 64  | 16      | >64   | 2   | <i>C. coli</i>   |
| 2016 | 16-CA01534 | Turkey_caecum_content  | EUCAMP2             | 0,5  | 1   | 32  | 8       | 32    | <=1 | <i>C. coli</i>   |
| 2016 | 16-CA01535 | Turkey_caecum_content  | EUCAMP2             | 0,5  | 2   | 32  | 8       | <=0,5 | <=1 | <i>C. coli</i>   |
| 2016 | 16-CA01536 | Turkey_caecum_content  | EUCAMP2             | 0,25 | 1   | 32  | 8       | 32    | <=1 | <i>C. coli</i>   |
| 2016 | 16-CA01537 | Broiler_caecum_content | EUCAMP2             | 0,5  | 1   | 32  | 8       | <=0,5 | <=1 | <i>C. coli</i>   |
| 2016 | 16-CA01538 | Turkey_caecum_content  | EUCAMP2             | 0,25 | 0,5 | 2   | <=0,125 | 16    | <=1 | <i>C. coli</i>   |
| 2016 | 16-CA01539 | Turkey_caecum_content  | EUCAMP2             | 0,5  | 1   | 64  | 16      | 64    | <=1 | <i>C. jejuni</i> |
| 2016 | 16-CA01540 | Turkey_caecum_content  | EUCAMP2             | 0,25 | 0,5 | 32  | 16      | 16    | <=1 | <i>C. coli</i>   |
| 2016 | 16-CA01541 | Turkey_caecum_content  | EUCAMP2             | 0,5  | 2   | 64  | 16      | 32    | <=1 | <i>C. coli</i>   |
| 2016 | 16-CA01542 | Turkey_caecum_content  | EUCAMP2             | 0,5  | 0,5 | 32  | 16      | 32    | <=1 | <i>C. jejuni</i> |
| 2016 | 16-CA01543 | Turkey_caecum_content  | EUCAMP2             | 0,5  | 1   | 64  | >16     | <=0,5 | 2   | <i>C. coli</i>   |
| 2016 | 16-CA01544 | Turkey_caecum_content  | EUCAMP2             | 0,5  | 1   | 64  | >16     | 32    | 4   | <i>C. coli</i>   |
| 2016 | 16-CA01545 | Broiler_caecum_content | EUCAMP2             | 0,5  | 1   | 64  | >16     | >64   | <=1 | <i>C. jejuni</i> |

Table S5: Minimum inhibitory concentrations of 6 antimicrobials for isolats of *C. jejuni* and *C. coli* from poultry

| Year | Sample No. | Matrix_final           | Antimicrobial panel | GEN     | STR    | NAL | CIP     | TET   | ERY  | Species          |
|------|------------|------------------------|---------------------|---------|--------|-----|---------|-------|------|------------------|
| 2016 | 16-CA01546 | Broiler_caecum_content | EUCAMP2             | 0,25    | 1      | 32  | 16      | 16    | <=1  | <i>C. jejuni</i> |
| 2016 | 16-CA01547 | Broiler_caecum_content | EUCAMP2             | 0,5     | 1      | 8   | 0,25    | <=0,5 | <=1  | <i>C. jejuni</i> |
| 2016 | 16-CA01548 | Turkey_caecum_content  | EUCAMP2             | 0,25    | 1      | 4   | 0,25    | 2     | <=1  | <i>C. coli</i>   |
| 2016 | 16-CA01549 | Turkey_caecum_content  | EUCAMP2             | 0,25    | 1      | 32  | 16      | 64    | <=1  | <i>C. coli</i>   |
| 2016 | 16-CA01550 | Turkey_caecum_content  | EUCAMP2             | 0,5     | 1      | 64  | 16      | 32    | 2    | <i>C. jejuni</i> |
| 2016 | 16-CA01551 | Broiler_caecum_content | EUCAMP2             | 1       | 16     | 64  | 16      | 32    | <=1  | <i>C. coli</i>   |
| 2016 | 16-CA01552 | Broiler_caecum_content | EUCAMP2             | 0,5     | >16    | 64  | >16     | >64   | >128 | <i>C. coli</i>   |
| 2016 | 16-CA01553 | Broiler_caecum_content | EUCAMP2             | 1       | 2      | 64  | 16      | 64    | <=1  | <i>C. coli</i>   |
| 2016 | 16-CA01553 | Broiler_caecum_content | EUCAMP2             | 0,5     | 1      | 64  | 16      | 64    | <=1  | <i>C. jejuni</i> |
| 2016 | 16-CA01554 | Turkey_caecum_content  | EUCAMP2             | 0,5     | 2      | 32  | 16      | 64    | 2    | <i>C. coli</i>   |
| 2016 | 16-CA01555 | Turkey_caecum_content  | EUCAMP2             | 0,5     | 2      | 64  | 16      | <=0,5 | 4    | <i>C. coli</i>   |
| 2016 | 16-CA01556 | Turkey_caecum_content  | EUCAMP2             | 0,25    | 1      | 64  | >16     | >64   | <=1  | <i>C. jejuni</i> |
| 2016 | 16-CA01557 | Turkey_caecum_content  | EUCAMP2             | 0,5     | 1      | 4   | <=0,125 | <=0,5 | <=1  | <i>C. jejuni</i> |
| 2016 | 16-CA01558 | Turkey_caecum_content  | EUCAMP2             | 0,5     | 1      | 64  | >16     | 64    | 2    | <i>C. coli</i>   |
| 2016 | 16-CA01558 | Turkey_caecum_content  | EUCAMP2             | 0,25    | 1      | 64  | >16     | >64   | <=1  | <i>C. jejuni</i> |
| 2016 | 16-CA01559 | Turkey_caecum_content  | EUCAMP2             | <=0,125 | <=0,25 | 2   | <=0,125 | <=0,5 | <=1  | <i>C. jejuni</i> |
| 2016 | 16-CA01560 | Turkey_caecum_content  | EUCAMP2             | <=0,125 | 0,5    | 32  | 8       | 32    | <=1  | <i>C. coli</i>   |
| 2016 | 16-CA01561 | Broiler_caecum_content | EUCAMP2             | 0,5     | 1      | 32  | 16      | 32    | <=1  | <i>C. jejuni</i> |
| 2016 | 16-CA01562 | Broiler_caecum_content | EUCAMP2             | 0,5     | 1      | 2   | 16      | <=0,5 | <=1  | <i>C. jejuni</i> |
| 2016 | 16-CA01576 | Broiler_caecum_content | EUCAMP2             | 0,25    | 1      | 32  | 8       | <=0,5 | <=1  | <i>C. coli</i>   |
| 2016 | 16-CA01577 | Broiler_caecum_content | EUCAMP2             | 0,25    | 0,5    | 64  | 8       | <=0,5 | <=1  | <i>C. coli</i>   |
| 2016 | 16-CA01578 | Broiler_caecum_content | EUCAMP2             | 0,5     | 1      | 4   | <=0,125 | <=0,5 | <=1  | <i>C. jejuni</i> |
| 2016 | 16-CA01579 | Broiler_caecum_content | EUCAMP2             | 0,25    | 0,5    | 4   | <=0,125 | <=0,5 | <=1  | <i>C. jejuni</i> |
| 2016 | 16-CA01588 | Broiler_caecum_content | EUCAMP2             | 0,5     | 1      | 32  | 8       | 16    | 2    | <i>C. coli</i>   |
| 2016 | 16-CA01597 | Turkey_caecum_content  | EUCAMP2             | 0,5     | 1      | 4   | 0,25    | <=0,5 | <=1  | <i>C. jejuni</i> |
| 2016 | 16-CA01598 | Broiler_caecum_content | EUCAMP2             | <=0,125 | 1      | 32  | 16      | 64    | <=1  | <i>C. jejuni</i> |
| 2016 | 16-CA01599 | Broiler_caecum_content | EUCAMP2             | 0,25    | 0,5    | 32  | >16     | >64   | <=1  | <i>C. jejuni</i> |
| 2016 | 16-CA01609 | Turkey_caecum_content  | EUCAMP2             | <=0,125 | 0,5    | 32  | 8       | <=0,5 | <=1  | <i>C. coli</i>   |
| 2016 | 16-CA01647 | Broiler_caecum_content | EUCAMP2             | 0,25    | 1      | 64  | >16     | >64   | <=1  | <i>C. jejuni</i> |
| 2016 | 16-CA01663 | Turkey_caecum_content  | EUCAMP2             | 1       | 2      | 64  | 16      | <=0,5 | <=1  | <i>C. jejuni</i> |
| 2016 | 16-CA01664 | Turkey_caecum_content  | EUCAMP2             | 1       | >16    | 64  | 16      | 64    | 2    | <i>C. coli</i>   |
| 2016 | 16-CA01665 | Turkey_caecum_content  | EUCAMP2             | 0,5     | 2      | 64  | 16      | 64    | 2    | <i>C. coli</i>   |

Table S5: Minimum inhibitory concentrations of 6 antimicrobials for isolats of *C. jejuni* and *C. coli* from poultry

| Year | Sample No. | Matrix_final           | Antimicrobial panel | GEN   | STR   | NAL       | CIP        | TET    | ERY Species          |
|------|------------|------------------------|---------------------|-------|-------|-----------|------------|--------|----------------------|
| 2016 | 16-CA01666 | Turkey_caecum_content  | EUCAMP2             | 0,5   | 2     | 64        | 16         | <=0,5  | <=1 <i>C. jejuni</i> |
| 2016 | 16-CA01678 | Broiler_caecum_content | EUCAMP2             | 0,25  | 1 <=1 | >16       | <=0,5      | <=1    | <i>C. jejuni</i>     |
| 2016 | 16-CA01679 | Turkey_caecum_content  | EUCAMP2             | 0,5   | 2     | 64        | 16         | 32     | <=1 <i>C. jejuni</i> |
| 2016 | 16-CA01680 | Turkey_caecum_content  | EUCAMP2             | 0,5   | 1     | 32        | 16         | 32     | <=1 <i>C. jejuni</i> |
| 2016 | 16-CA01681 | Turkey_caecum_content  | EUCAMP2             | 0,5   | 1     | 64        | >16        | >64    | 2 <i>C. jejuni</i>   |
| 2016 | 16-CA01682 | Turkey_caecum_content  | EUCAMP2             | 0,5   | >16   | 32        | >16        | 64     | >128 <i>C. coli</i>  |
| 2016 | 16-CA01683 | Turkey_caecum_content  | EUCAMP2             | 0,5   | 2     | 4         | 0,25       | <=0,5  | <=1 <i>C. jejuni</i> |
| 2016 | 16-CA01684 | Turkey_caecum_content  | EUCAMP2             | 1 >16 | >64   | >16       | >64        |        | 4 <i>C. coli</i>     |
| 2016 | 16-CA01685 | Turkey_caecum_content  | EUCAMP2             | 0,5   | >16   | 32        | 16         | 64     | >128 <i>C. coli</i>  |
| 2016 | 16-CA01686 | Turkey_caecum_content  | EUCAMP2             | 0,25  | 1 >64 | >16       | <=0,5      | <=1    | <i>C. jejuni</i>     |
| 2016 | 16-CA01687 | Broiler_caecum_content | EUCAMP2             | 0,5   | 1     | 4 <=0,125 | <=0,5      | <=1    | <i>C. jejuni</i>     |
| 2016 | 16-CA01688 | Broiler_caecum_content | EUCAMP2             | 0,5   | 1     | 64        | 8          | <=0,5  | <=1 <i>C. jejuni</i> |
| 2016 | 16-CA01689 | Broiler_caecum_content | EUCAMP2             | 0,25  | 0,5   | 32 >16    | >64        | <=1    | <i>C. jejuni</i>     |
| 2016 | 16-CA01690 | Turkey_caecum_content  | EUCAMP2             | 0,5   | 1     | 32        | 16         | 64     | 2 <i>C. coli</i>     |
| 2016 | 16-CA01691 | Turkey_caecum_content  | EUCAMP2             | 0,5   | >16   | 32        | 16         | 64     | 2 <i>C. coli</i>     |
| 2016 | 16-CA01692 | Turkey_caecum_content  | EUCAMP2             | 0,5   | 1     | 4 <=0,125 | <=0,5      | <=1    | <i>C. jejuni</i>     |
| 2016 | 16-CA01693 | Turkey_caecum_content  | EUCAMP2             | 0,5   | 2     | 64        | 8          | 32     | <=1 <i>C. coli</i>   |
| 2016 | 16-CA01695 | Turkey_caecum_content  | EUCAMP2             | 0,5   | 2     | 64        | 8          | 64     | <=1 <i>C. coli</i>   |
| 2016 | 16-CA01696 | Turkey_caecum_content  | EUCAMP2             | 1 >16 |       | 64 >16    | >64        | >128   | <i>C. coli</i>       |
| 2016 | 16-CA01697 | Turkey_caecum_content  | EUCAMP2             | 0,5   | 1     | 64        | 16         | >64    | 2 <i>C. coli</i>     |
| 2016 | 16-CA01698 | Turkey_caecum_content  | EUCAMP2             | 0,25  | 1 <=1 |           | 16         | 64 <=1 | <i>C. jejuni</i>     |
| 2016 | 16-CA01699 | Turkey_caecum_content  | EUCAMP2             | 0,5   | 1     | 8         | 0,5        | >64    | <=1 <i>C. jejuni</i> |
| 2016 | 16-CA01700 | Turkey_caecum_content  | EUCAMP2             | 0,5   | 1     | 64        | 16         | 32     | <=1 <i>C. jejuni</i> |
| 2016 | 16-CA01701 | Broiler_caecum_content | EUCAMP2             | 0,5   | 1     | 64        | >16        | >64    | 2 <i>C. jejuni</i>   |
| 2016 | 16-CA01702 | Turkey_caecum_content  | EUCAMP2             | 0,5   | 1     | 64        | >16        | >64    | 4 <i>C. coli</i>     |
| 2016 | 16-CA01703 | Turkey_caecum_content  | EUCAMP2             | 0,5   | 1     | 32        | 16         | 32     | <=1 <i>C. coli</i>   |
| 2016 | 16-CA01704 | Turkey_caecum_content  | EUCAMP2             | 0,5   | 1     | 64        | >16        | >64    | 4 <i>C. coli</i>     |
| 2016 | 16-CA01705 | Broiler_caecum_content | EUCAMP2             | 0,5   | >16   | 32        | 8          | 32     | <=1 <i>C. coli</i>   |
| 2016 | 16-CA01706 | Broiler_caecum_content | EUCAMP2             | 0,5   | >16   | 32        | 8          | 32     | <=1 <i>C. coli</i>   |
| 2016 | 16-CA01707 | Broiler_caecum_content | EUCAMP2             | 0,25  | 1     | 4         | 0,25 <=0,5 | <=1    | <i>C. jejuni</i>     |
| 2016 | 16-CA01708 | Broiler_caecum_content | EUCAMP2             | 0,5   | 2     | 4         | 0,25 <=0,5 | <=1    | <i>C. jejuni</i>     |
| 2016 | 16-CA01709 | Turkey_caecum_content  | EUCAMP2             | 0,5   | 1     | 64        | 16         | 32     | <=1 <i>C. jejuni</i> |

Table S5: Minimum inhibitory concentrations of 6 antimicrobials for isolats of *C. jejuni* and *C. coli* from poultry

| Year | Sample No. | Matrix_final           | Antimicrobial panel | GEN     | STR    | NAL | CIP     | TET   | ERY  | Species          |
|------|------------|------------------------|---------------------|---------|--------|-----|---------|-------|------|------------------|
| 2016 | 16-CA01710 | Turkey_caecum_content  | EUCAMP2             | 0,25    | 0,5    | 4   | <=0,125 | 8     | <=1  | <i>C. jejuni</i> |
| 2016 | 16-CA01711 | Turkey_caecum_content  | EUCAMP2             | 0,5     | 1      | 64  | >16     | >64   | <=1  | <i>C. jejuni</i> |
| 2016 | 16-CA01712 | Turkey_caecum_content  | EUCAMP2             | 1       | 2      | 64  | 8       | 64    | <=1  | <i>C. coli</i>   |
| 2016 | 16-CA01713 | Turkey_caecum_content  | EUCAMP2             | 0,5     | >16    | 32  | 16      | >64   | >128 | <i>C. coli</i>   |
| 2016 | 16-CA01714 | Turkey_caecum_content  | EUCAMP2             | 0,25    | 1      | 32  | 8       | 64    | <=1  | <i>C. coli</i>   |
| 2016 | 16-CA01715 | Turkey_caecum_content  | EUCAMP2             | 0,5     | 2      | >64 | 8       | <=0,5 | <=1  | <i>C. jejuni</i> |
| 2016 | 16-CA01716 | Turkey_caecum_content  | EUCAMP2             | 0,5     | 2      | 64  | 16      | >64   | 2    | <i>C. coli</i>   |
| 2016 | 16-CA01732 | Turkey_caecum_content  | EUCAMP2             | 0,5     | 2      | 64  | 16      | 64    | 2    | <i>C. jejuni</i> |
| 2016 | 16-CA01733 | Turkey_caecum_content  | EUCAMP2             | <=0,125 | >16    | 32  | 16      | <=0,5 | <=1  | <i>C. jejuni</i> |
| 2016 | 16-CA01735 | Turkey_caecum_content  | EUCAMP2             | 0,5     | >16    | 32  | 16      | 32    | <=1  | <i>C. jejuni</i> |
| 2016 | 16-CA01751 | Broiler_caecum_content | EUCAMP2             | 1       | 2      | 4   | <=0,125 | <=0,5 | <=1  | <i>C. jejuni</i> |
| 2016 | 16-CA01752 | Broiler_caecum_content | EUCAMP2             | 0,5     | 1      | 4   | <=0,125 | <=0,5 | <=1  | <i>C. jejuni</i> |
| 2016 | 16-CA01753 | Broiler_caecum_content | EUCAMP2             | 0,5     | 1      | 64  | 16      | 32    | 4    | <i>C. coli</i>   |
| 2016 | 16-CA01780 | Turkey_caecum_content  | EUCAMP2             | 0,5     | 1      | 32  | >16     | <=0,5 | <=1  | <i>C. coli</i>   |
| 2016 | 16-CA01784 | Broiler_caecum_content | EUCAMP2             | 0,5     | 2      | 64  | 16      | <=0,5 | 2    | <i>C. coli</i>   |
| 2016 | 16-CA01784 | Broiler_caecum_content | EUCAMP2             | 0,5     | 1      | 64  | 16      | 64    | <=1  | <i>C. jejuni</i> |
| 2016 | 16-CA01785 | Broiler_caecum_content | EUCAMP2             | 1       | 1      | 64  | 16      | >64   | <=1  | <i>C. jejuni</i> |
| 2016 | 16-CA01792 | Broiler_caecum_content | EUCAMP2             | 0,5     | 0,5    | 8   | 0,25    | <=0,5 | <=1  | <i>C. jejuni</i> |
| 2016 | 16-CA01793 | Broiler_caecum_content | EUCAMP2             | <=0,125 | <=0,25 | 4   | <=0,125 | <=0,5 | <=1  | <i>C. jejuni</i> |
| 2016 | 16-CA01794 | Broiler_caecum_content | EUCAMP2             | 0,5     | 1      | 8   | 0,25    | <=0,5 | <=1  | <i>C. jejuni</i> |
| 2016 | 16-CA01795 | Broiler_caecum_content | EUCAMP2             | 0,5     | 1      | 8   | 0,25    | <=0,5 | <=1  | <i>C. jejuni</i> |
| 2016 | 16-CA01797 | Broiler_caecum_content | EUCAMP2             | 0,5     | 1      | 64  | 16      | <=0,5 | <=1  | <i>C. jejuni</i> |
| 2016 | 16-CA01798 | Broiler_caecum_content | EUCAMP2             | 0,5     | 1      | 4   | <=0,125 | <=0,5 | <=1  | <i>C. jejuni</i> |
| 2016 | 16-CA01799 | Broiler_caecum_content | EUCAMP2             | 0,5     | 1      | 64  | 8       | <=0,5 | <=1  | <i>C. jejuni</i> |
| 2016 | 17-CA00003 | Turkey_caecum_content  | EUCAMP2             | 0,5     | 1      | 64  | >16     | >64   | 4    | <i>C. coli</i>   |
| 2016 | 17-CA00004 | Turkey_caecum_content  | EUCAMP2             | 0,5     | 2      | >64 | >16     | <=0,5 | 2    | <i>C. jejuni</i> |
| 2016 | 17-CA00006 | Broiler_caecum_content | EUCAMP2             | 0,5     | 1      | 32  | 16      | 32    | <=1  | <i>C. jejuni</i> |
| 2016 | 17-CA00007 | Broiler_caecum_content | EUCAMP2             | 0,5     | 2      | 32  | 4       | 4     | <=1  | <i>C. coli</i>   |
| 2016 | 17-CA00029 | Broiler_caecum_content | EUCAMP2             | 0,5     | 1      | 64  | 16      | >64   | <=1  | <i>C. jejuni</i> |
| 2016 | 17-CA00092 | Broiler_caecum_content | EUCAMP2             | 0,5     | 4      | 32  | 16      | <=0,5 | <=1  | <i>C. jejuni</i> |
| 2016 | 17-CA00093 | Broiler_caecum_content | EUCAMP2             | 0,5     | 1      | 64  | 16      | >64   | <=1  | <i>C. jejuni</i> |
| 2016 | 17-CA00095 | Broiler_caecum_content | EUCAMP2             | 0,5     | 4      | >64 | 16      | >64   | <=1  | <i>C. jejuni</i> |
