# Supplementary material for: Association of Antimicrobial Resistance in Campylobacter spp. in Broilers and Turkeys with Antimicrobial Use
Source: MDPI journal article supplement (doi:10.3390/antibiotics10060673), 2021-06-04
Supplement: s1 [file s1]

**Supplementary Table S1.** Association of year with full susceptibility and resistance to antimicrobials in *C. jejuni* from broilers and turkeys.

|                     | Caecal Samples Broilers |           |          | Caecal Samples Turkeys |           |          |
|---------------------|-------------------------|-----------|----------|------------------------|-----------|----------|
|                     | OR                      | 95%CI     | <i>p</i> | OR                     | 95%CI     | <i>p</i> |
| Full susceptibility | 1.053                   | 0.93–1.2  | 0.434    | 0.982                  | 0.88–1.09 | 0.741    |
| Streptomycin        | 0.985                   | 0.67–1.45 | 0.938    | 0.938                  | 0.76–1.16 | 0.560    |
| Nalidixic acid      | 1.137                   | 1.01–1.28 | 0.028    | 1.141                  | 1.04–1.25 | 0.004    |
| Ciprofloxacin       | 1.106                   | 0.98–1.24 | 0.093    | 1.074                  | 0.98–1.18 | 0.139    |
| Tetracyclin         | 1.034                   | 0.92–1.16 | 0.559    | 0.897                  | 0.82–0.98 | 0.019    |
| Erythromycin        | 0.728                   | 0.5–1.06  | 0.097    | 0.721                  | 0.49–1.05 | 0.089    |

Coding of variables: resistant (1) vs. susceptible (0) for NAL (nalidixic acid), CIP (ciprofloxacin), ERY (erythromycin), TET (tetracycline), STR (streptomycin); fully susceptible (1) vs. resistant to  $\geq 1$  antimicrobial (0).

**Supplementary Table S2.** Association of year with full susceptibility and resistance to antimicrobials in *C. coli* from broilers and turkeys.

|                     | Caecal Samples Broilers |           |          | Caecal Samples Turkeys |           |          |
|---------------------|-------------------------|-----------|----------|------------------------|-----------|----------|
|                     | OR                      | 95%CI     | <i>p</i> | OR                     | 95%CI     | <i>p</i> |
| Full susceptibility | 1.042                   | 0.66–1.64 | 0.859    | 0.957                  | 0.74–1.23 | 0.731    |
| Streptomycin        | 1.150                   | 0.85–1.56 | 0.373    | 0.991                  | 0.88–1.12 | 0.880    |
| Nalidixic acid      | 0.954                   | 0.74–1.24 | 0.720    | 0.963                  | 0.84–1.1  | 0.583    |
| Ciprofloxacin       | 1.016                   | 0.77–1.34 | 0.909    | 1.052                  | 0.9–1.23  | 0.538    |
| Tetracyclin         | 1.128                   | 0.88–1.45 | 0.345    | 0.778                  | 0.67–0.9  | 0.001    |
| Erythromycin        | 0.759                   | 0.59–0.97 | 0.029    | 0.709                  | 0.65–0.78 | 0.000    |

Coding of variables: resistant (1) vs. susceptible (0) for NAL (nalidixic acid), CIP (ciprofloxacin), ERY (erythromycin), TET (tetracycline), STR (streptomycin); fully susceptible (1) vs. resistant to  $\geq 1$  antimicrobial (0).

**Supplementary Table S3.** Association of therapy frequency with full susceptibility and resistance to antimicrobials in *C. jejuni* from broilers and turkeys.

|                     |          | Caecal Samples Broilers |           |          | Caecal Samples Turkeys |           |          |
|---------------------|----------|-------------------------|-----------|----------|------------------------|-----------|----------|
|                     |          | OR                      | 95%CI     | <i>p</i> | OR                     | 95%CI     | <i>p</i> |
| Full susceptibility | TF_total | 0.985                   | 0.93–1.04 | 0.594    | 1.048                  | 1-1.1     | 0.059    |
| Streptomycin        | TH_Amino | No valid result         |           |          | No valid result        |           |          |
| Nalidixic acid      | TH_FQ    | 0.117                   | 0.02–0.61 | 0.011    | 0.458                  | 0.29-0.72 | 0.001    |
| Ciprofloxacin       | TH_FQ    | 0.350                   | 0.06–1.94 | 0.230    | 0.464                  | 0.29-0.74 | 0.001    |
| Tetracyclin         | TH_Tet   | 0.982                   | 0.18–5.44 | 0.984    | 1.278                  | 0.69-2.36 | 0.433    |
| Erythromycin        | TH_Macro | No valid result         |           |          | No valid result        |           |          |

Coding of variables: Resistant (1) vs. susceptible (0) for NAL (nalidixic acid), CIP (ciprofloxacin), ERY (erythromycin), TET (tetracycline), STR (streptomycin); Fully susceptible (1) vs. resistant to  $\geq 1$  antimicrobial (0); TF\_total: Treatment frequency (TF) considering all substances, TF\_FQ: TF with fluoroquinolones, TF\_Macro: TF with macrolides, TF\_TET: TF with tetracyclines, TF\_Amino: TF with aminoglycosides

**Supplementary Table S4.** Association of therapy frequency with full susceptibility and resistance to antimicrobials in *C. coli* from broilers and turkeys.

|                     |          | Caecal samples broilers |            |       | Caecal samples turkeys |           |       |
|---------------------|----------|-------------------------|------------|-------|------------------------|-----------|-------|
|                     |          | OR                      | 95%CI      | p     | OR                     | 95%CI     | p     |
| Full susceptibility | TF_total | 1.111                   | 0.87–1.42  | 0.406 | 1.013                  | 0.89–1.15 | 0.850 |
| Streptomycin        | TH_Amino | 0.744                   | 0.39–1.41  | 0.366 | No valid result        |           |       |
| Nalidixic acid      | TH_FQ    | 0.291                   | 0.01–12.87 | 0.523 | 0.907                  | 0.47–1.75 | 0.771 |
| Ciprofloxacin       | TH_FQ    | 0.028                   | 0–3.75     | 0.152 | 0.516                  | 0.21–1.28 | 0.153 |
| Tetracyclin         | TH_Tet   | 0.222                   | 0–18.22    | 0.503 | 3.066                  | 1.33–7.06 | 0.008 |
| Erythromycin        | TH_Makro | 13.025                  | 1.36–124.5 | 0.026 | 4.365                  | 2.33–8.16 | 0.000 |

Coding of variables: Resistant (1) vs. susceptible (0) for NAL (nalidixic acid), CIP (ciprofloxacin), ERY (erythromycin), TET (tetracycline), STR (streptomycin); Fully susceptible (1) vs. resistant to  $\geq 1$  antimicrobial (0); TF\_total: Treatment frequency (TF) considering all substances, TF\_FQ: TF with fluoroquinolones, TF\_Macro: TF with macrolides, TF\_TET: TF with tetracyclines, TF\_Amino: TF with aminoglycosides
